# Supplementary figures and images for: Herbivore camping reshapes the taxonomy, function and network of pasture soil microbial communities
Source: PeerJ journal article supplement (doi:10.7717/peerj.14314), 2022-11-09

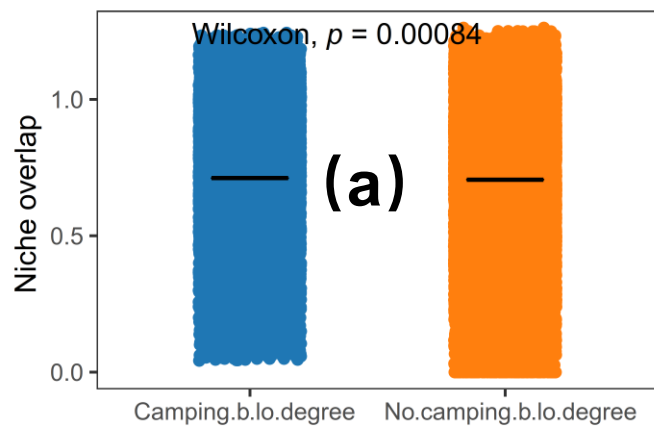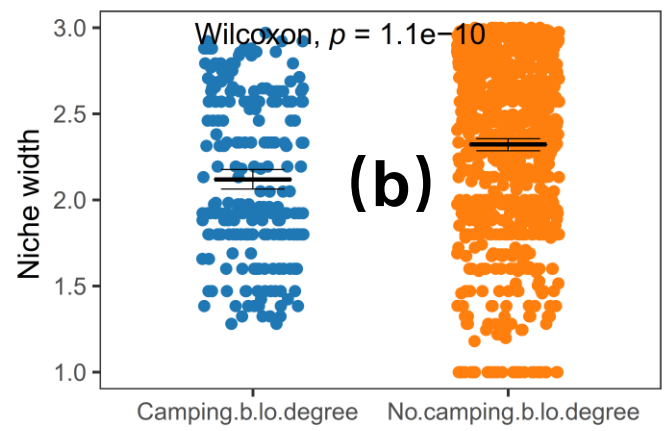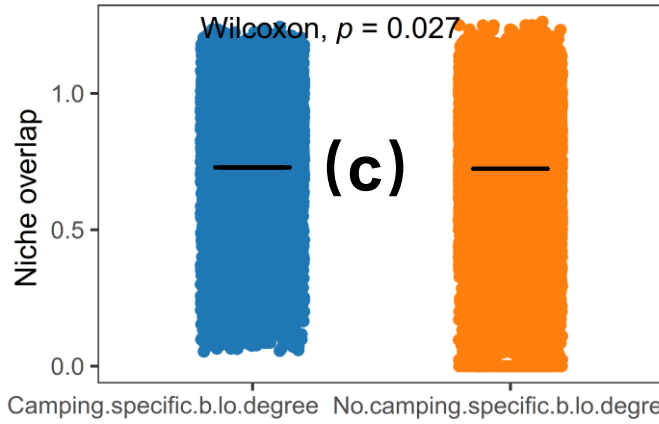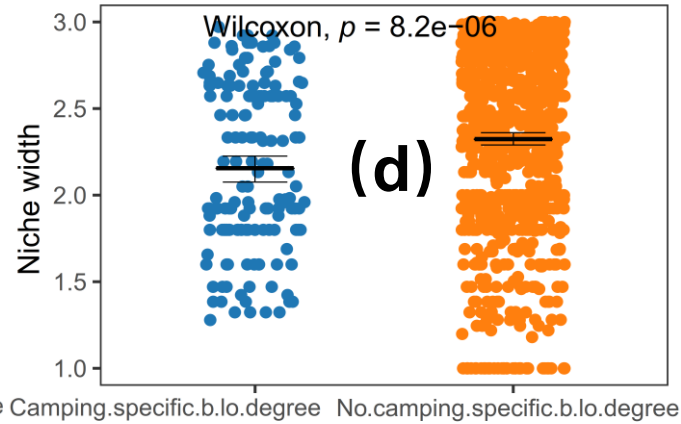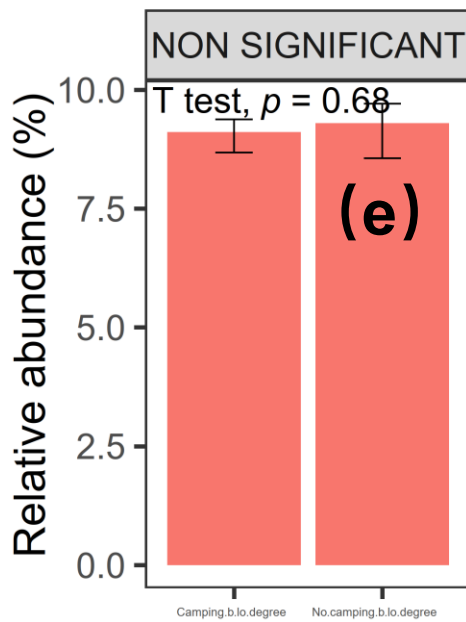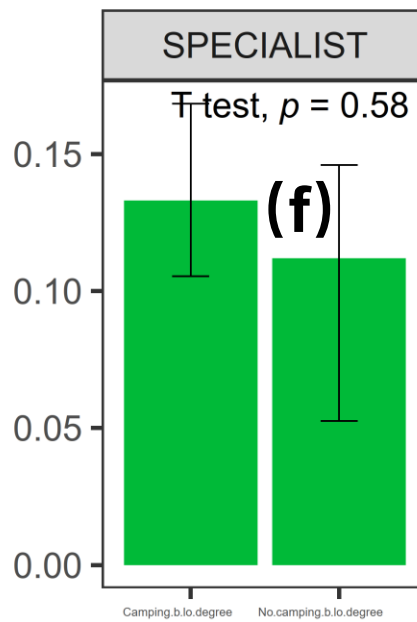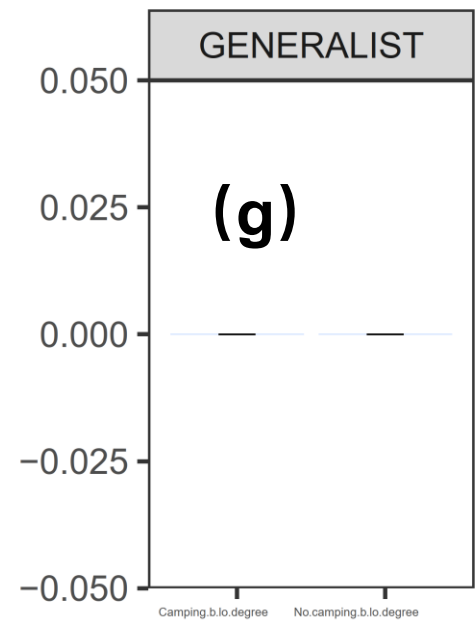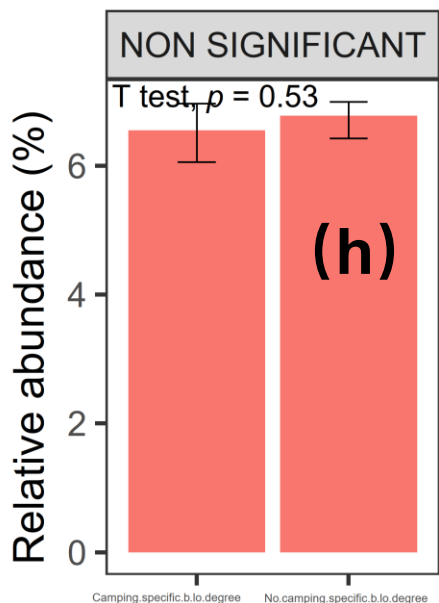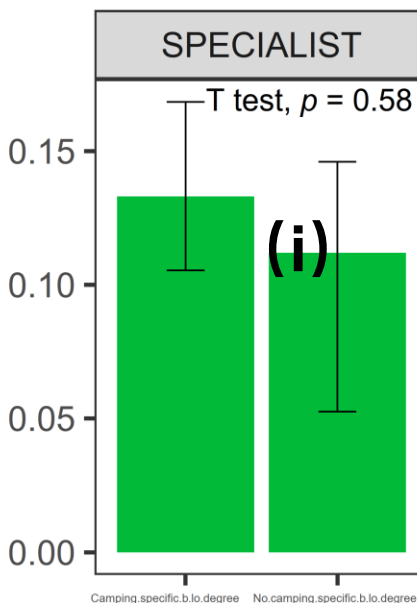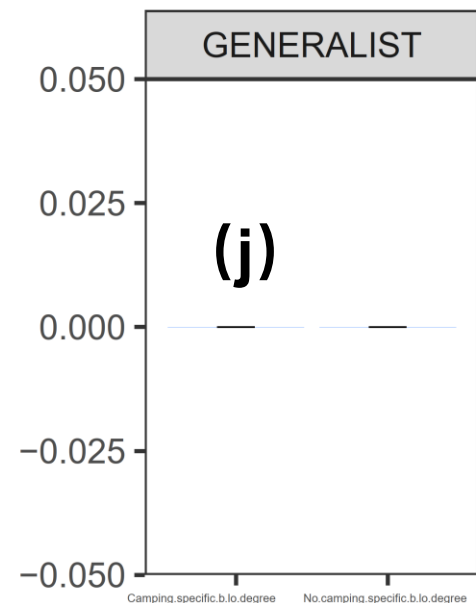

Group

Supplement: Supplementary_Materials_of_Ding_L_et_al_.zip [file Supplementary_Materials_of_Ding_L_et_al_.zip]

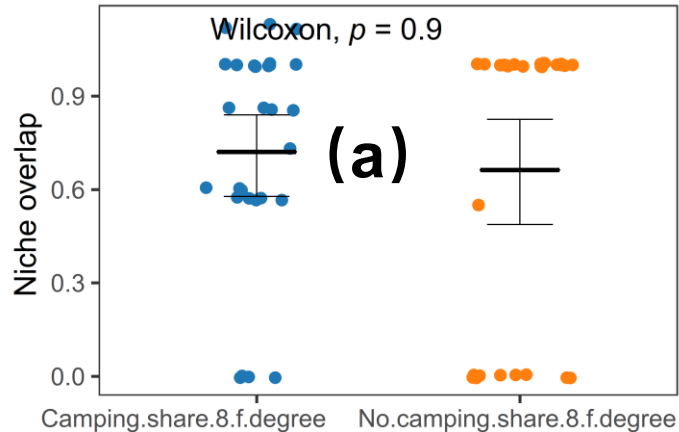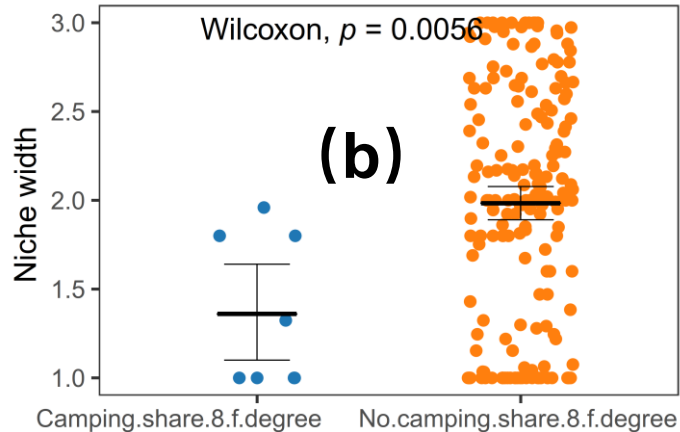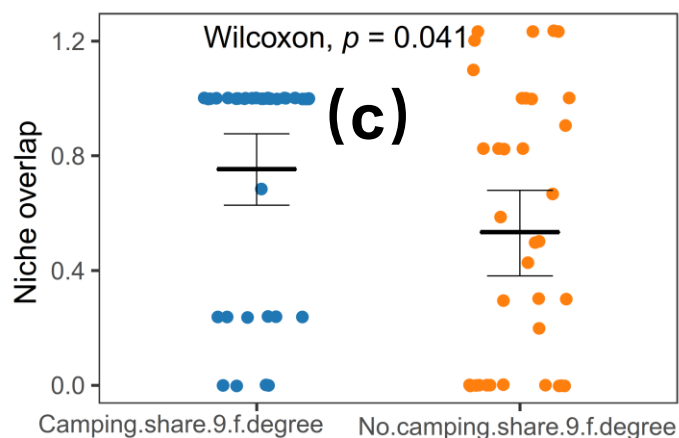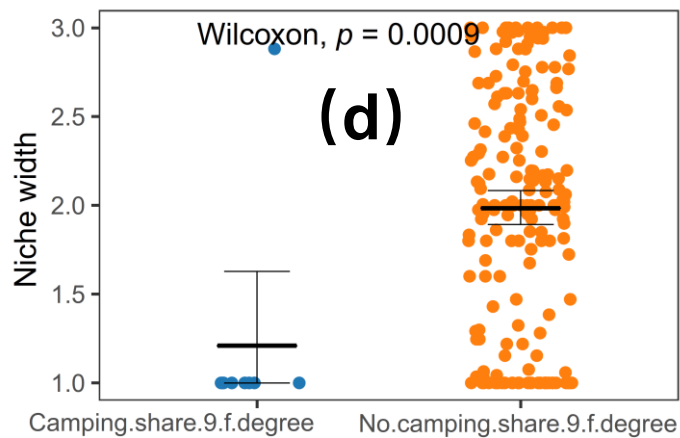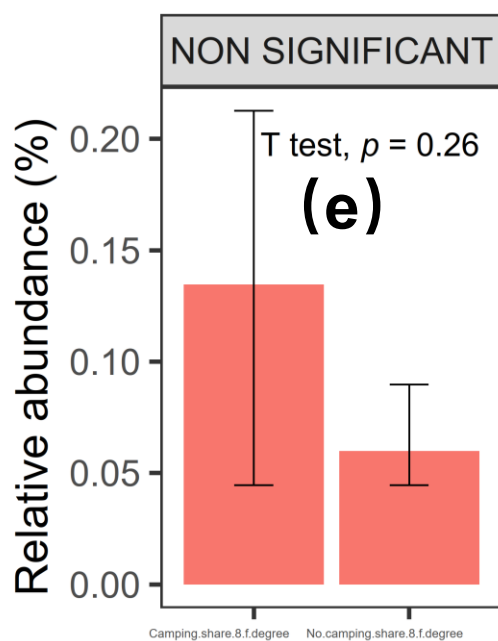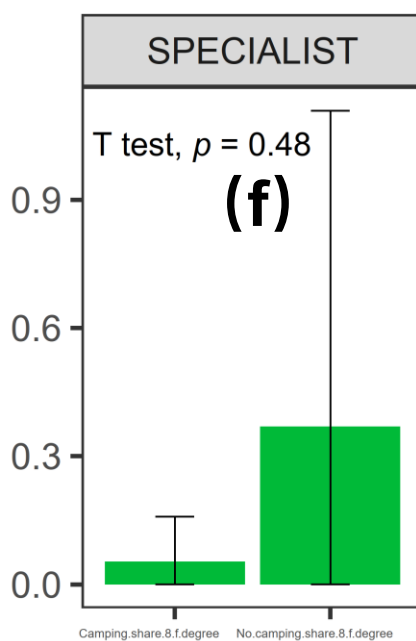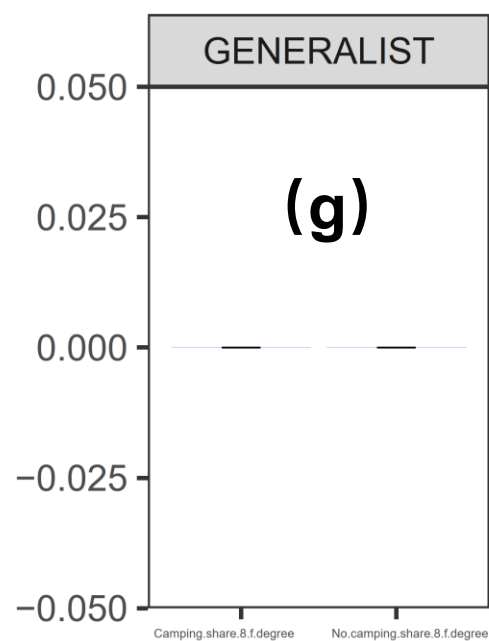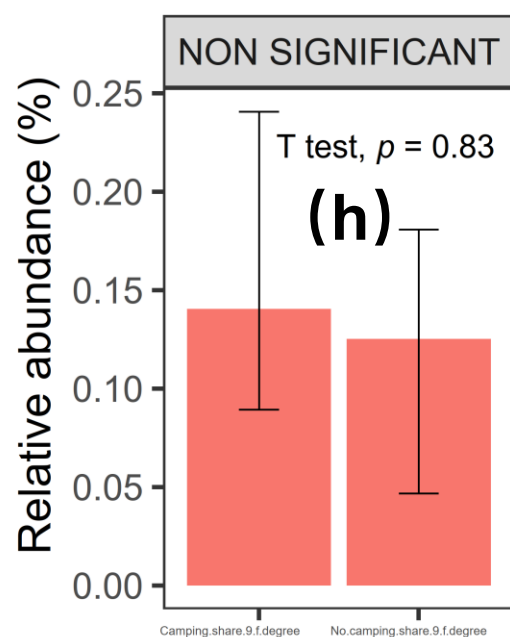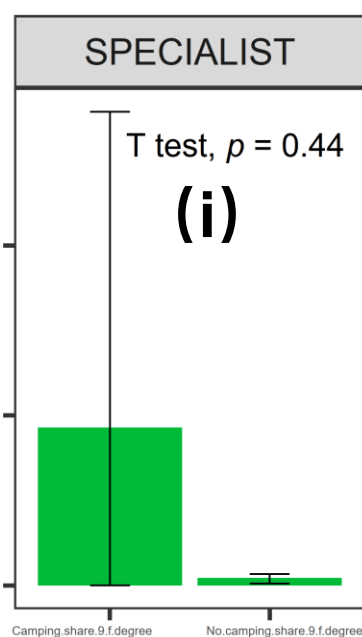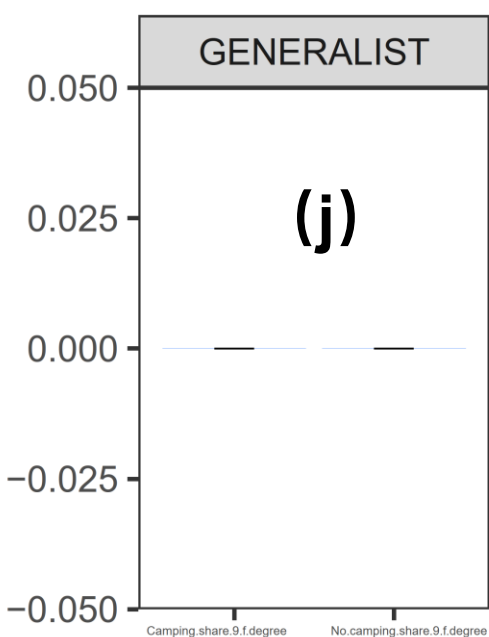

Group

Supplement: Supplementary_Materials_of_Ding_L_et_al_.zip [file Supplementary_Materials_of_Ding_L_et_al_.zip]

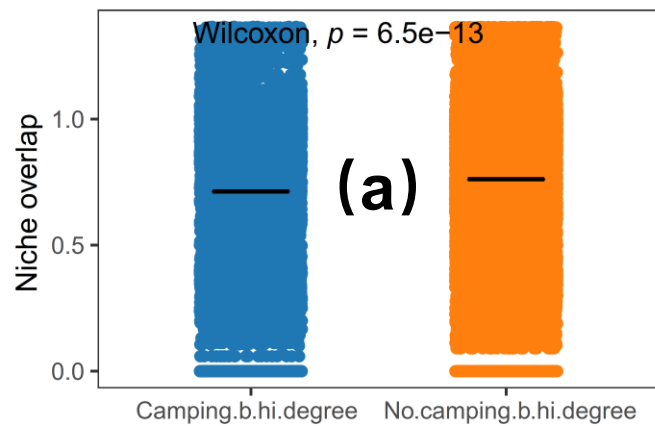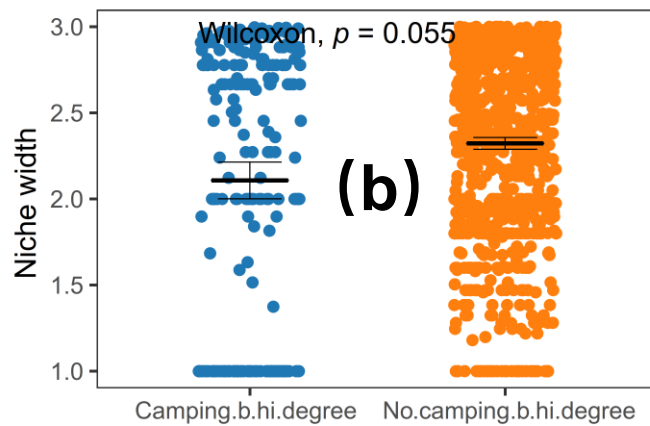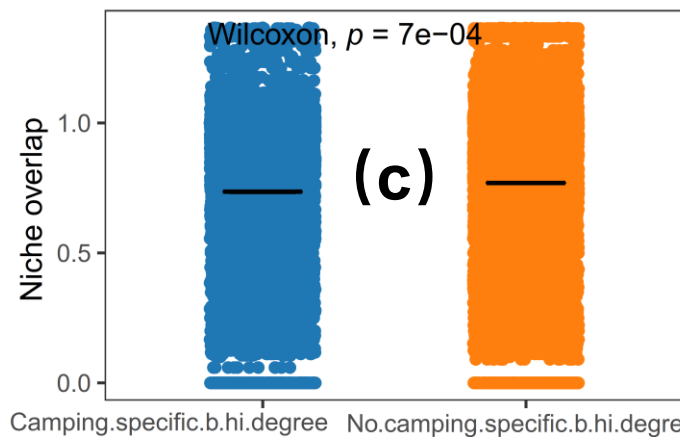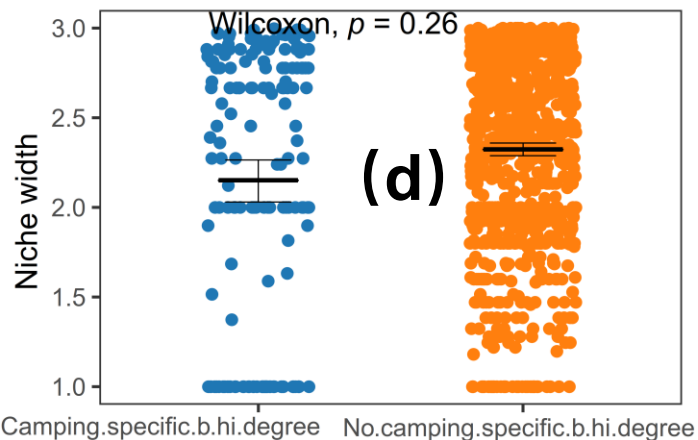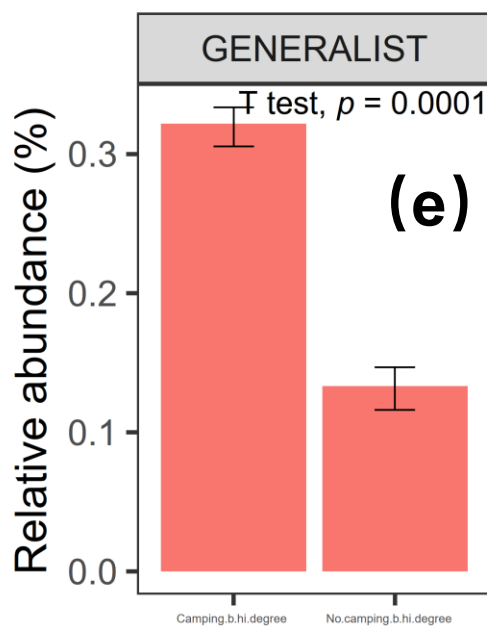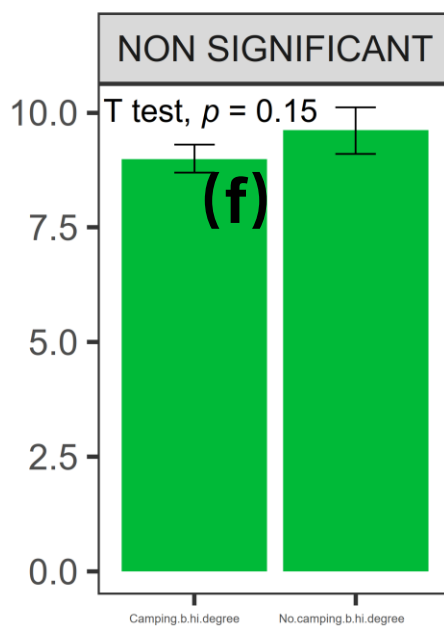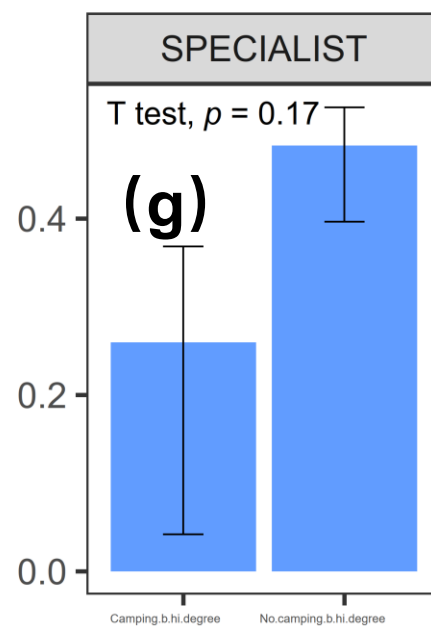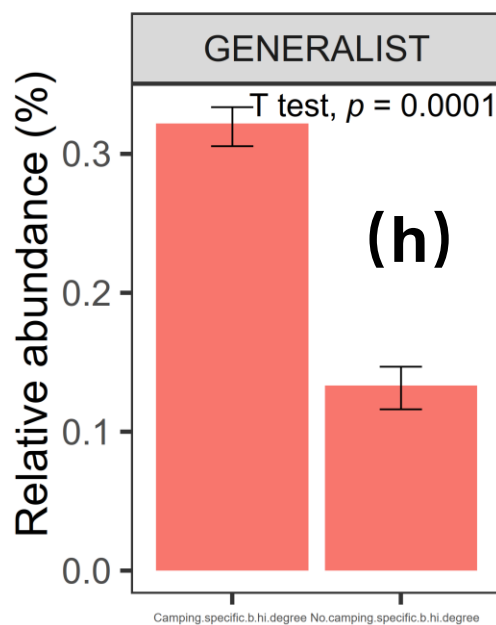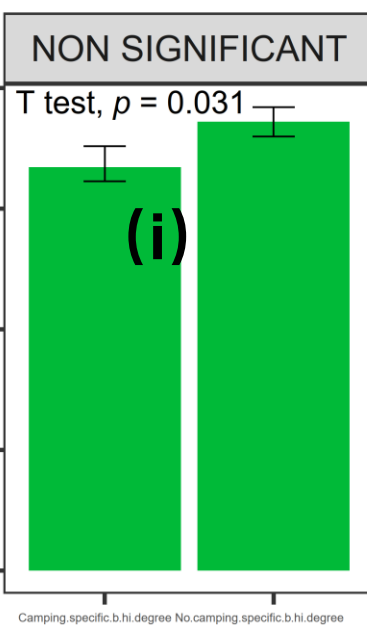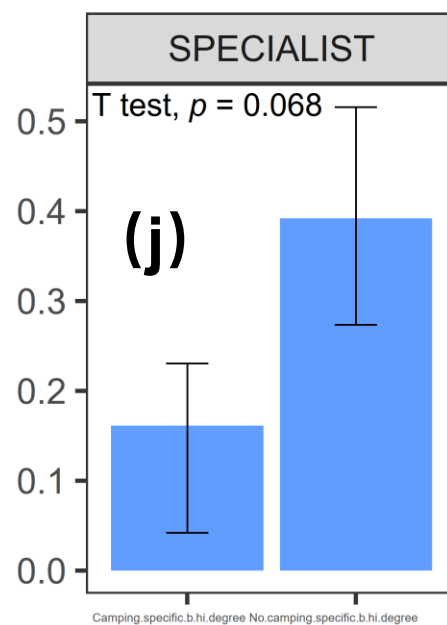

Group

Supplement: Supplementary_Materials_of_Ding_L_et_al_.zip [file Supplementary_Materials_of_Ding_L_et_al_.zip]

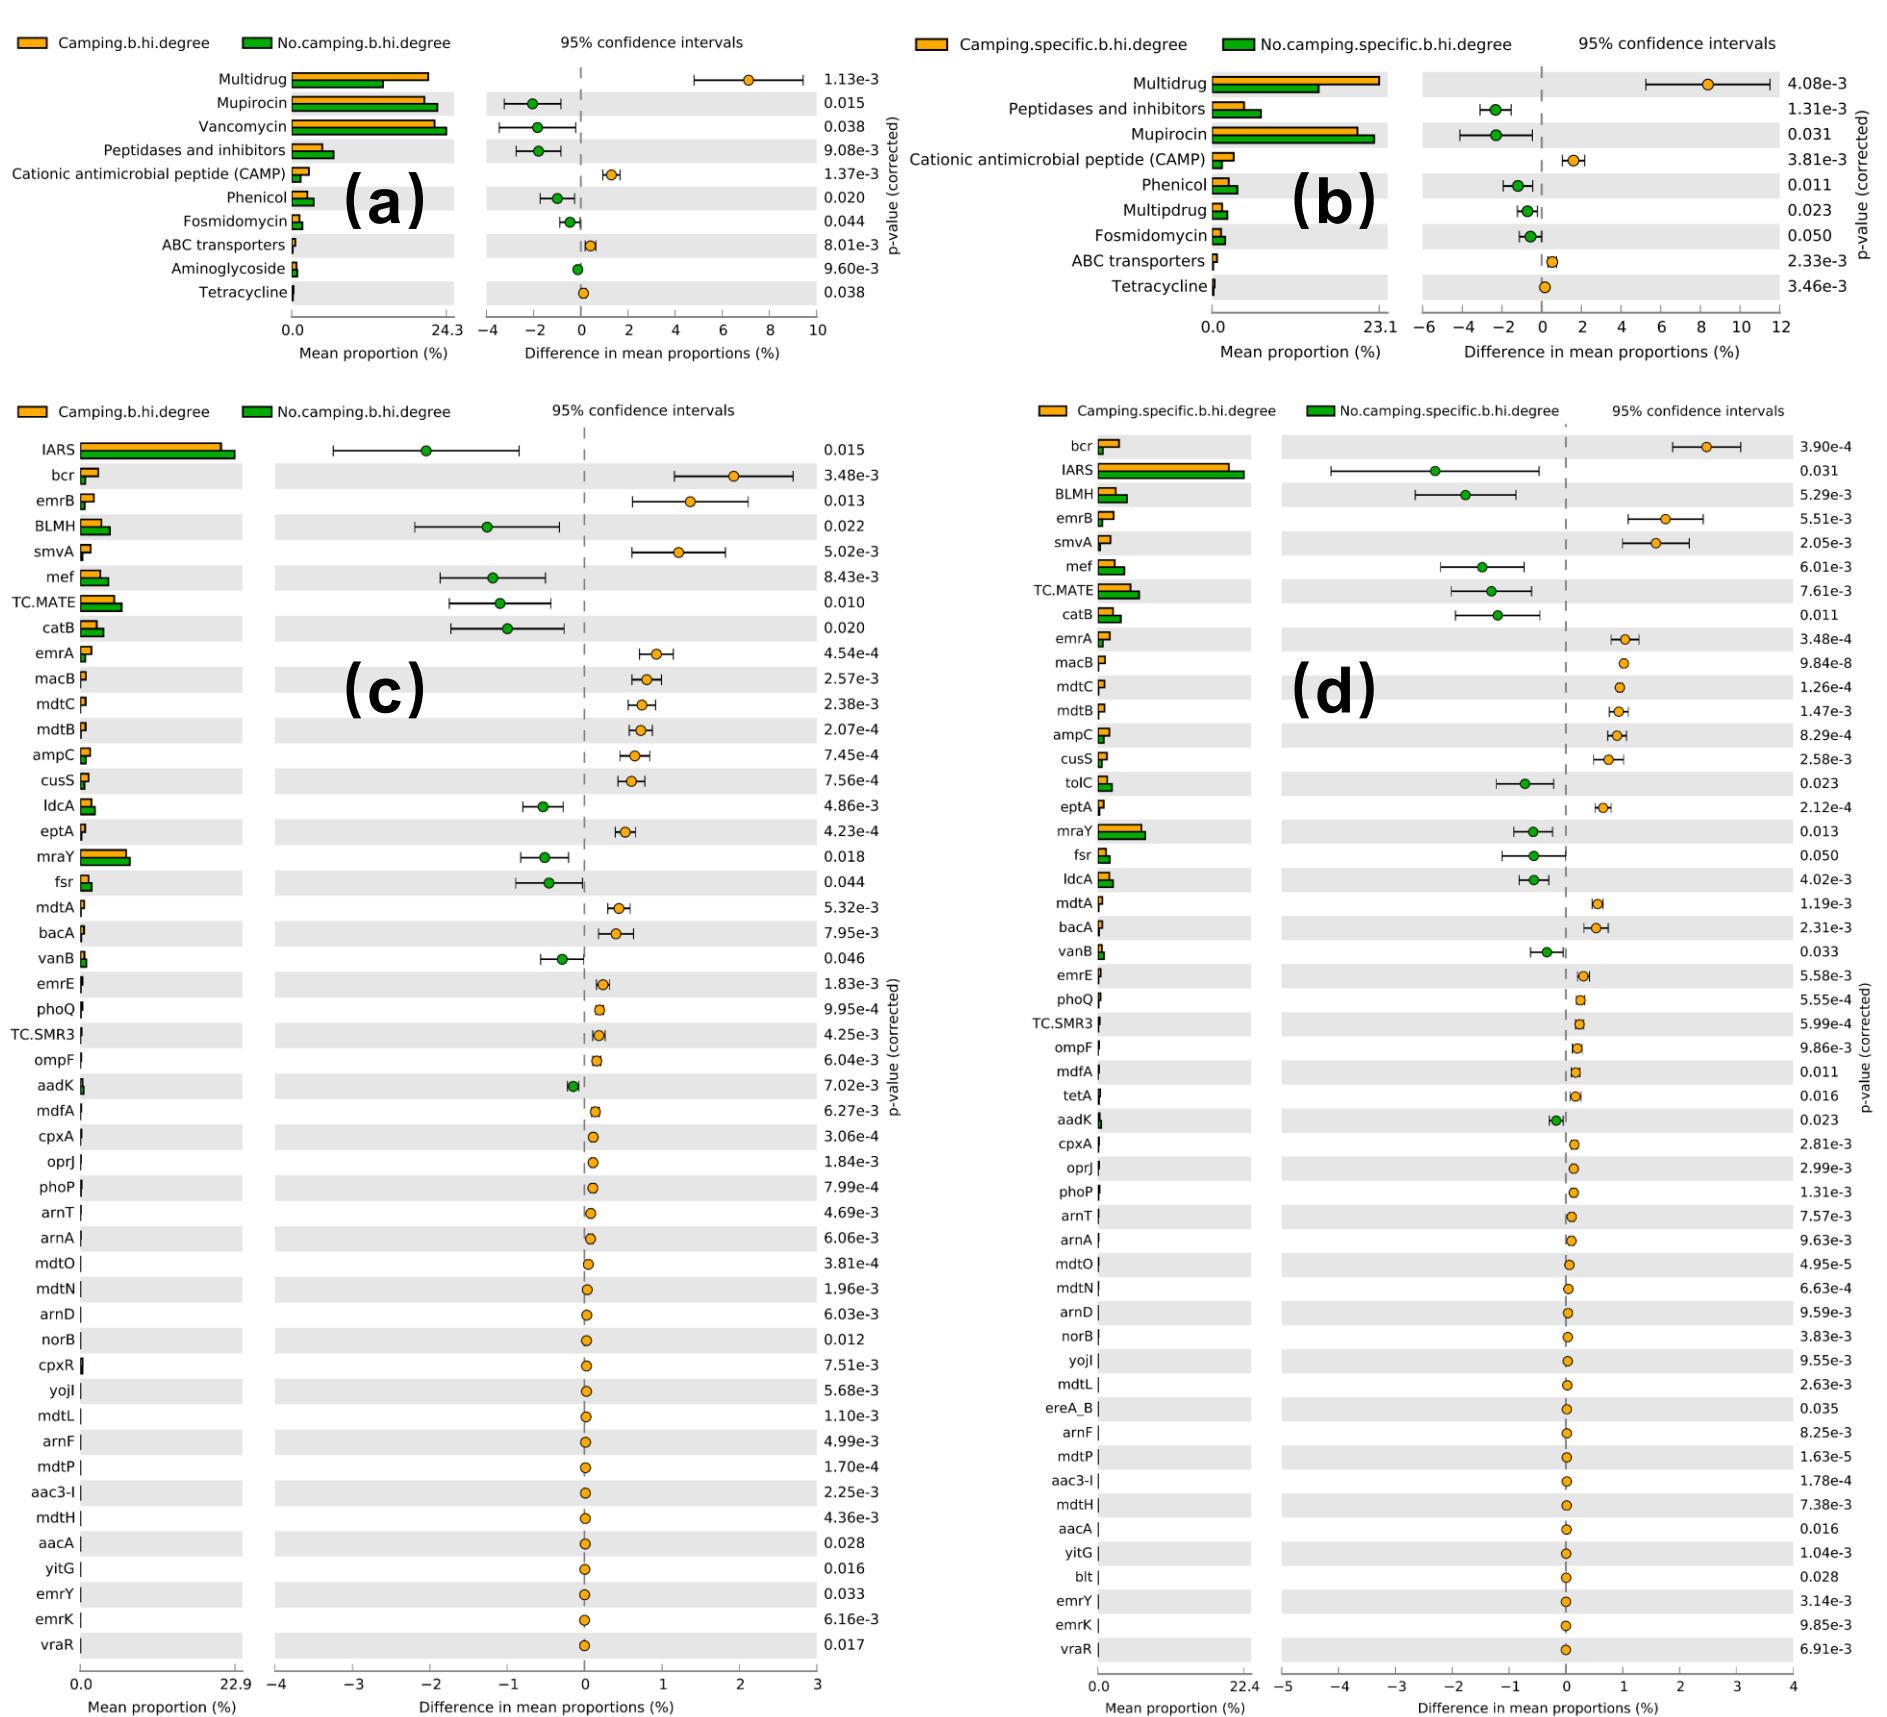

Supplement: Supplementary_Materials_of_Ding_L_et_al_.zip [file Supplementary_Materials_of_Ding_L_et_al_.zip]

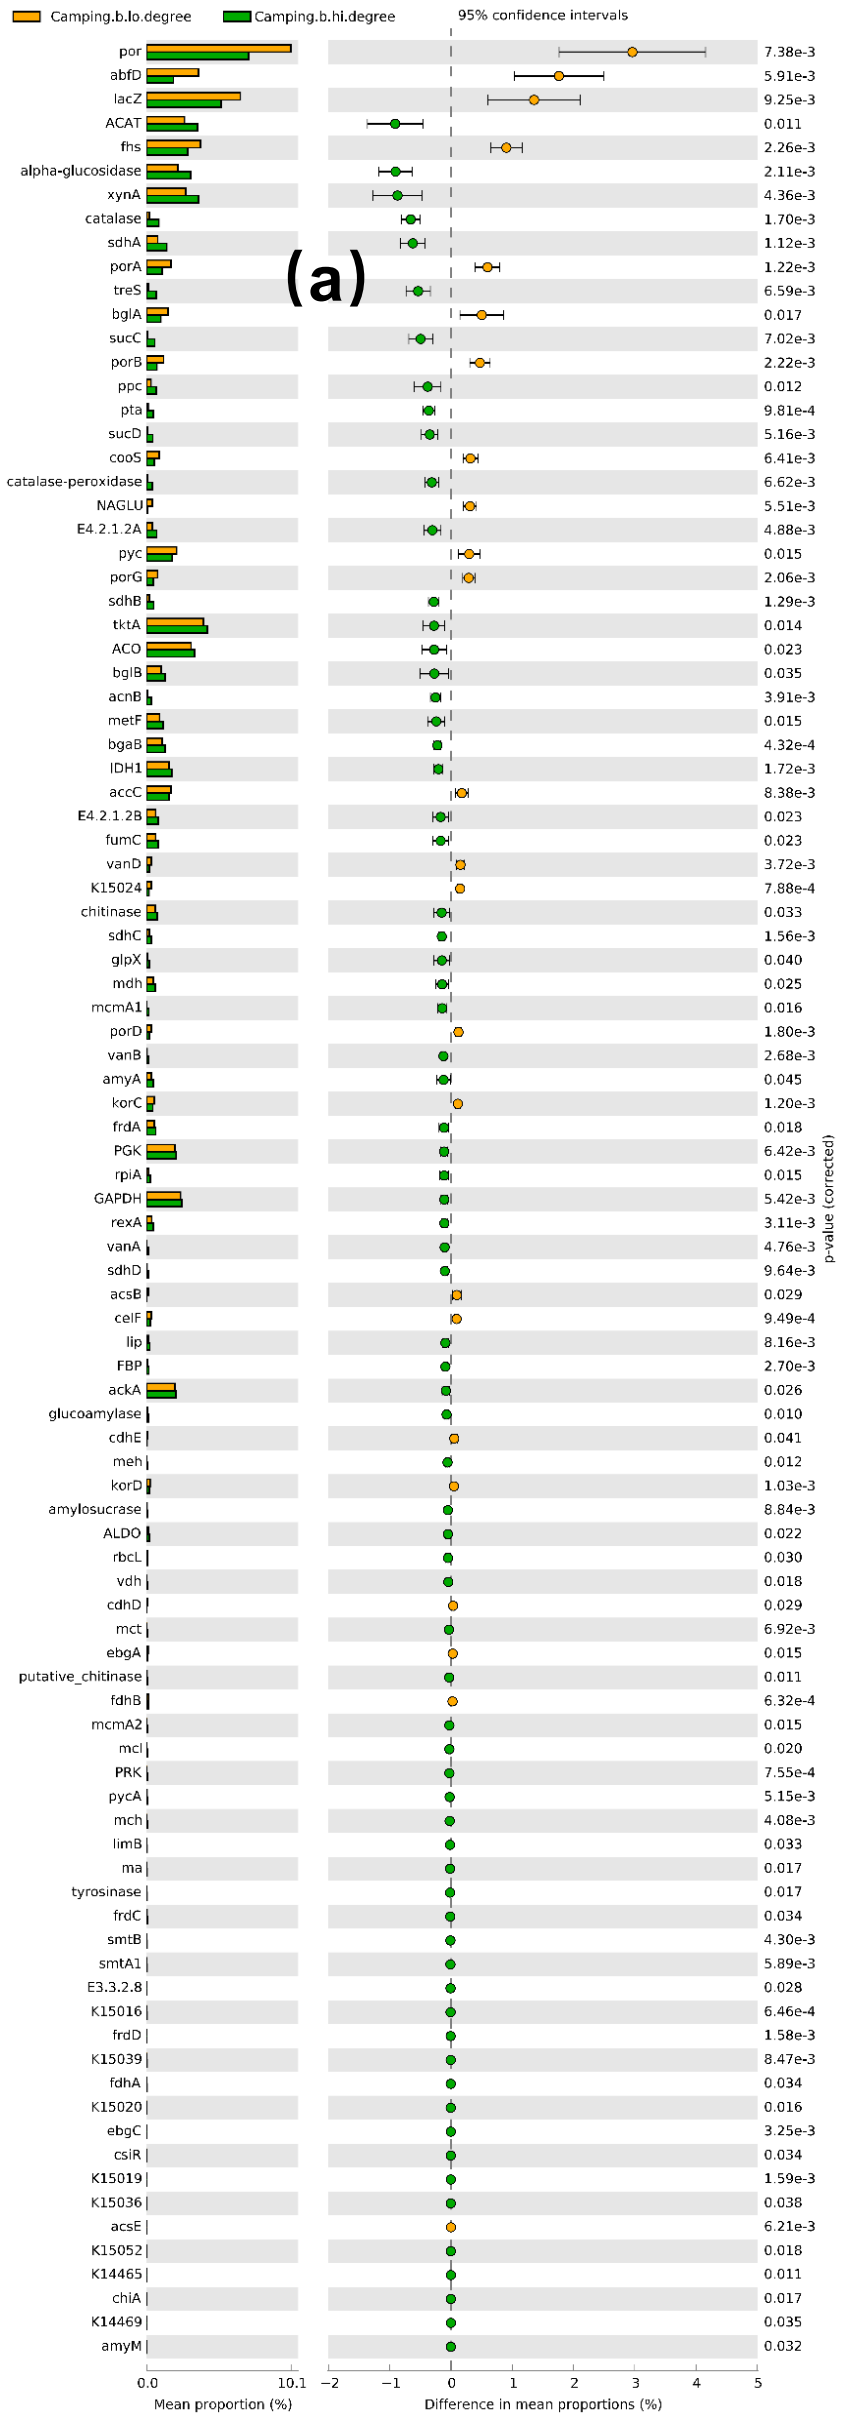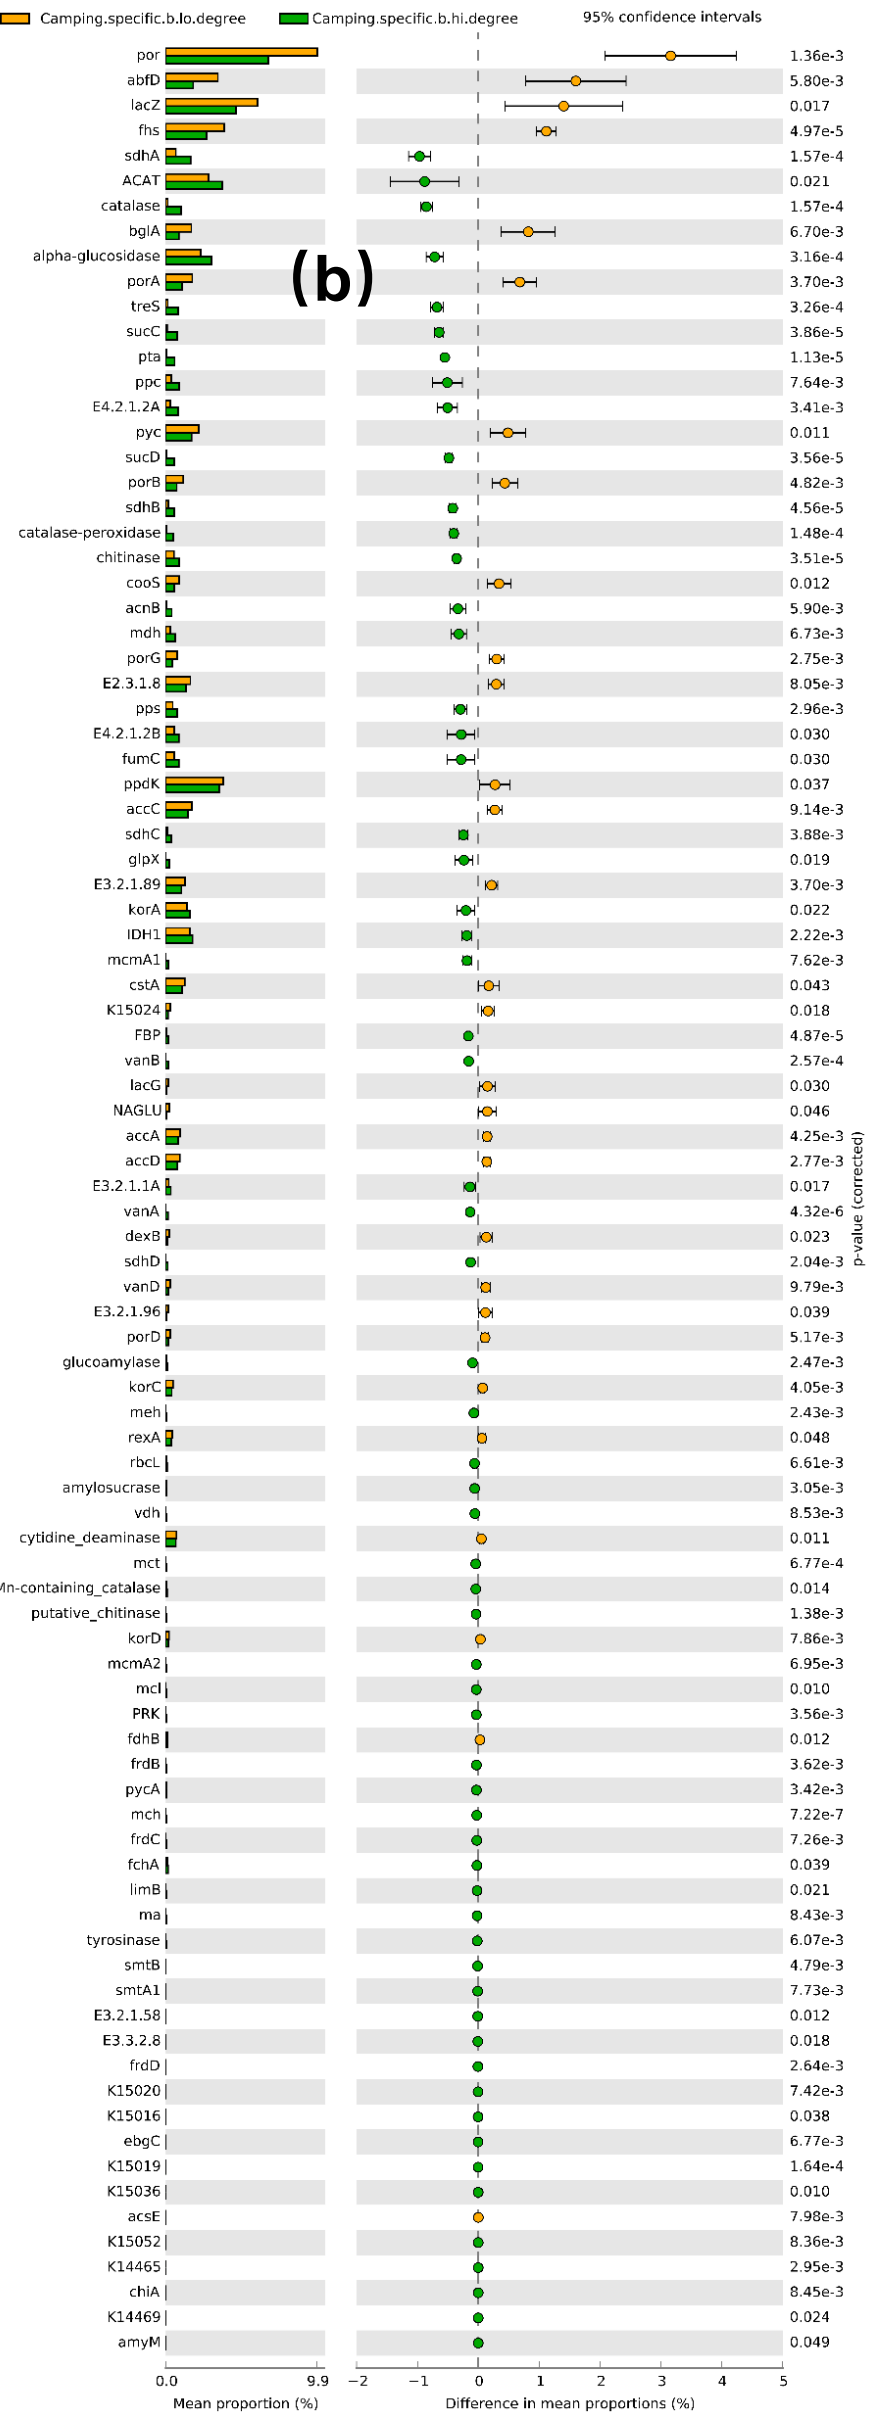

Supplement: Supplementary_Materials_of_Ding_L_et_al_.zip [file Supplementary_Materials_of_Ding_L_et_al_.zip]

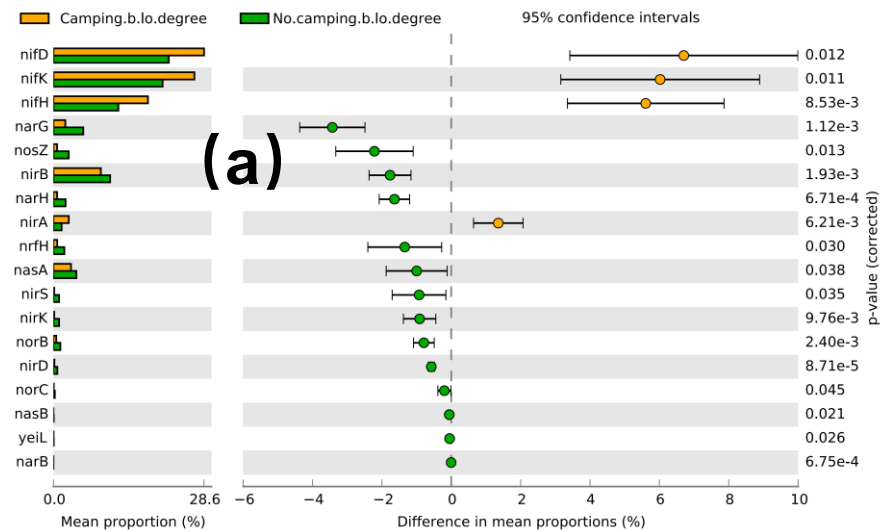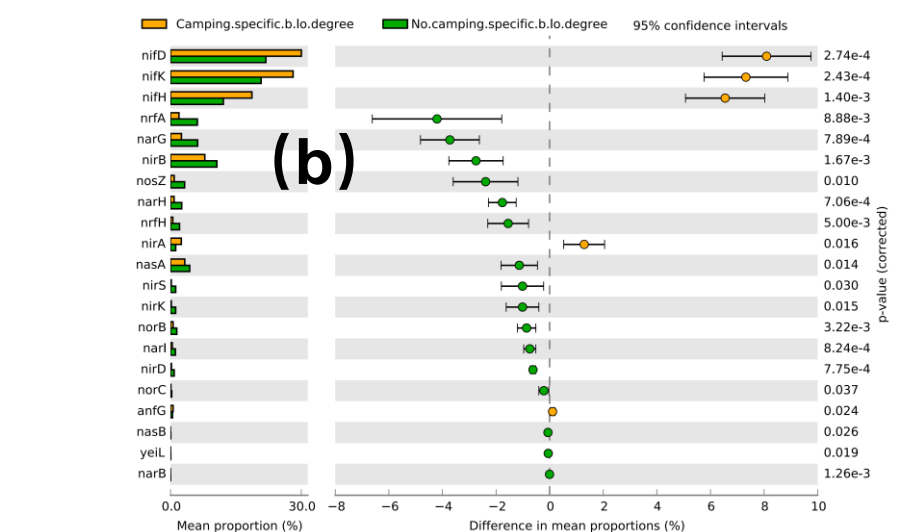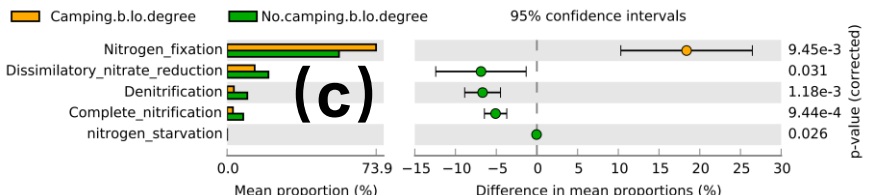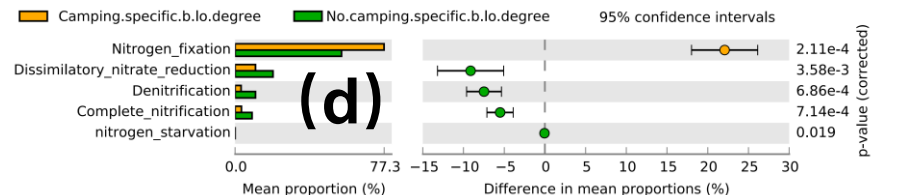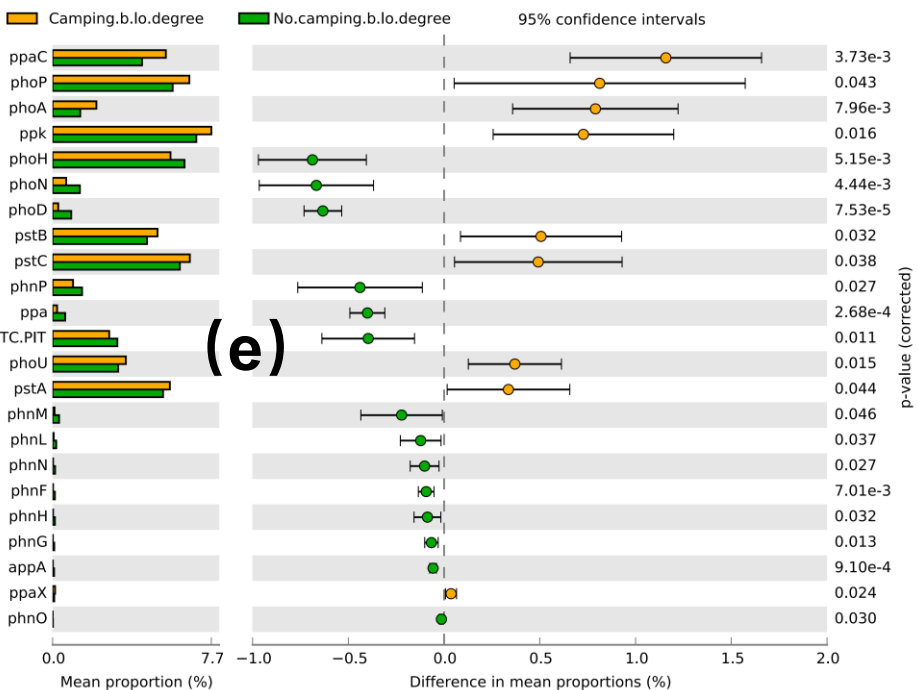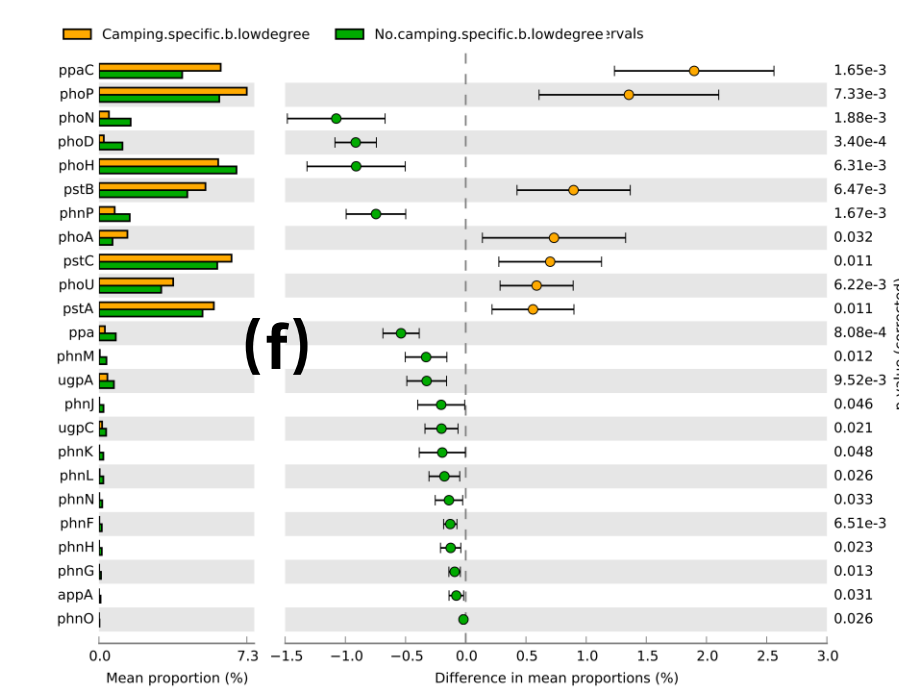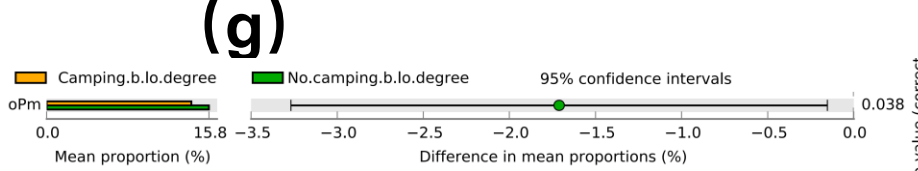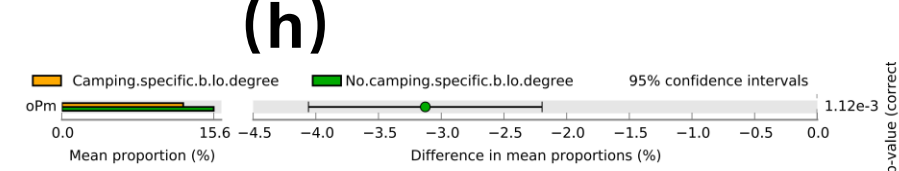

Supplement: Supplementary_Materials_of_Ding_L_et_al_.zip [file Supplementary_Materials_of_Ding_L_et_al_.zip]

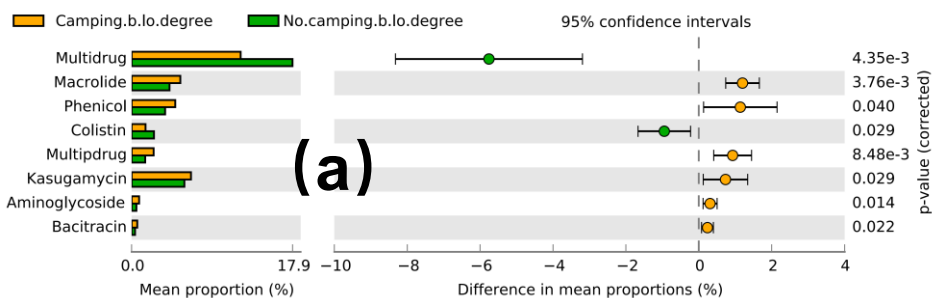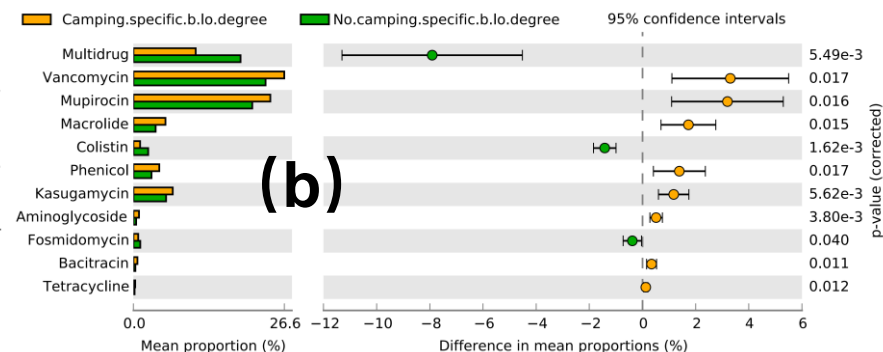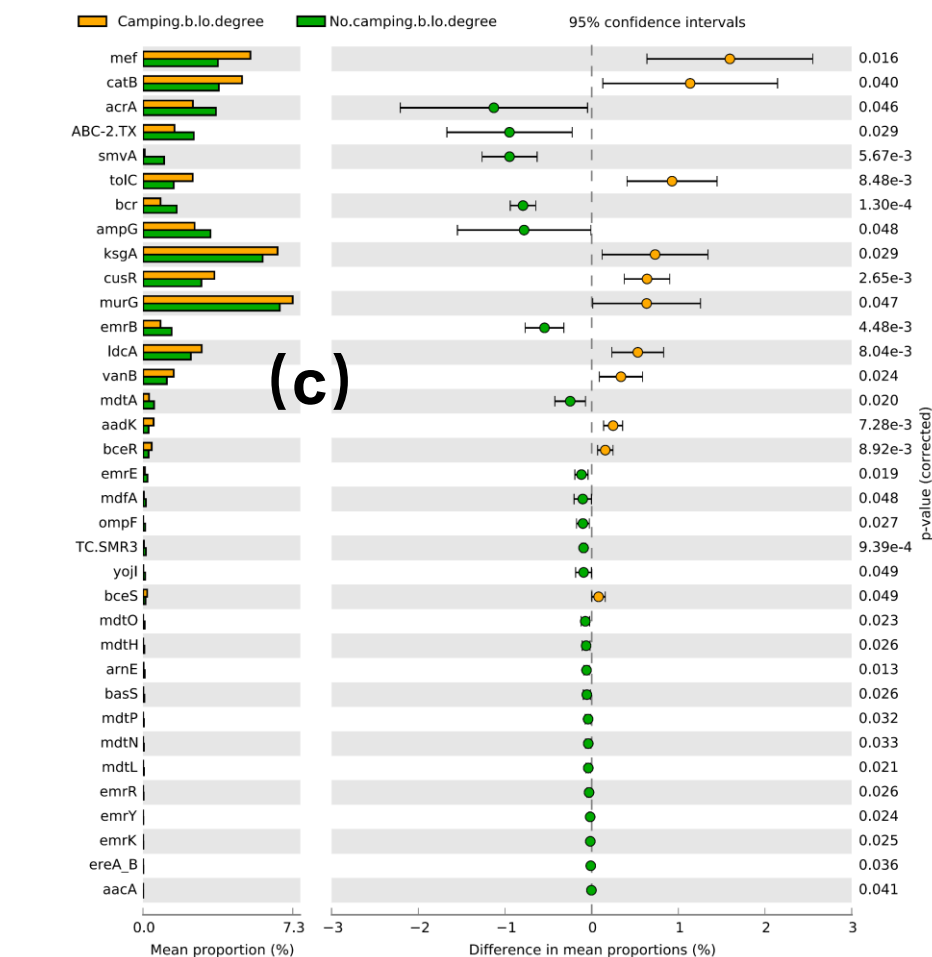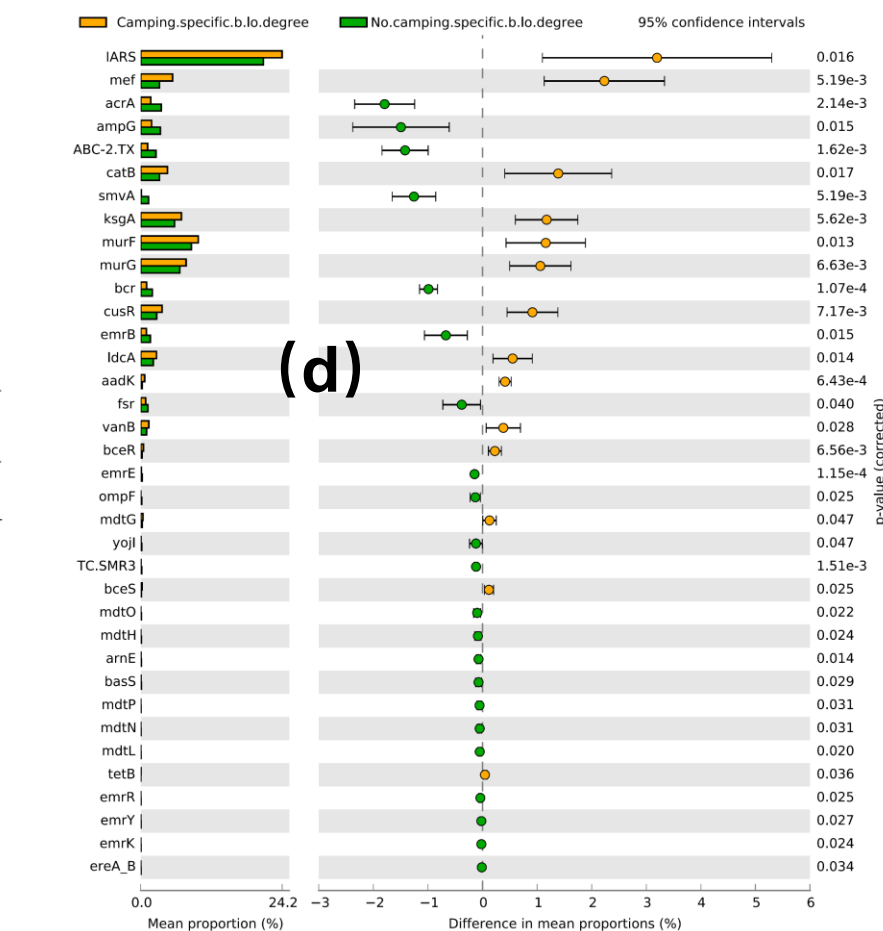

Supplement: Supplementary_Materials_of_Ding_L_et_al_.zip [file Supplementary_Materials_of_Ding_L_et_al_.zip]

(a)

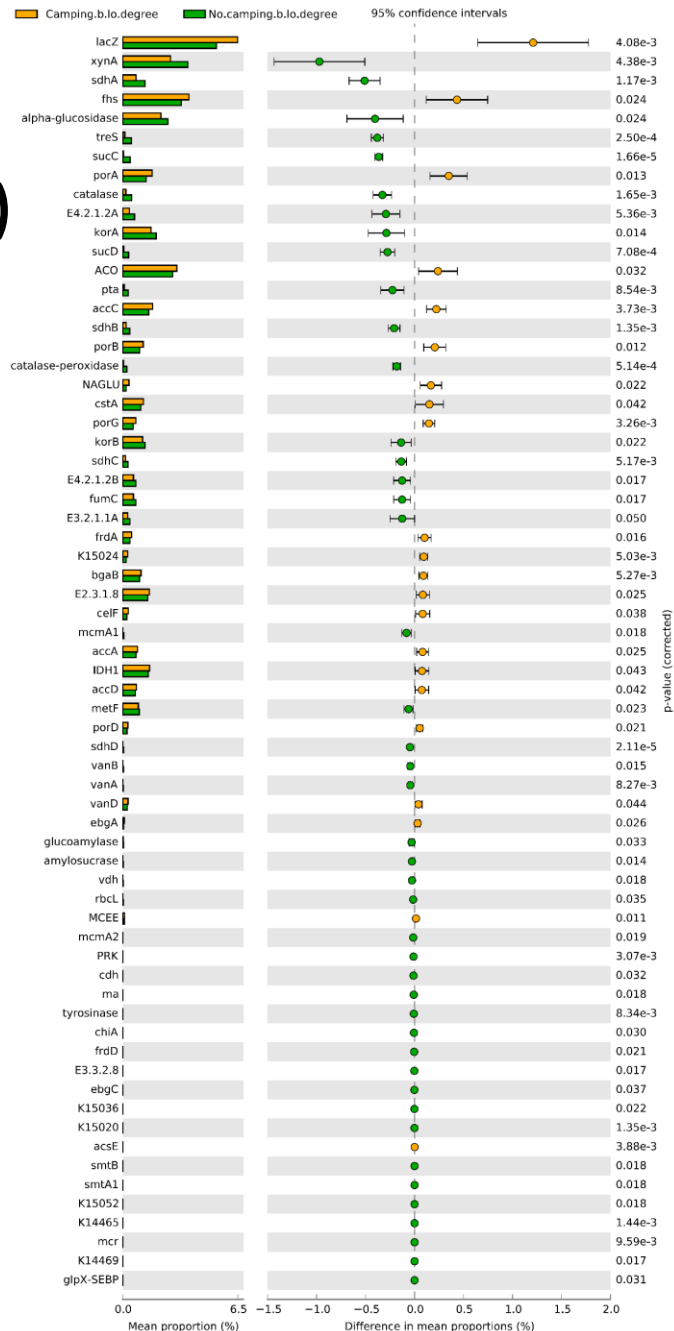

(b)

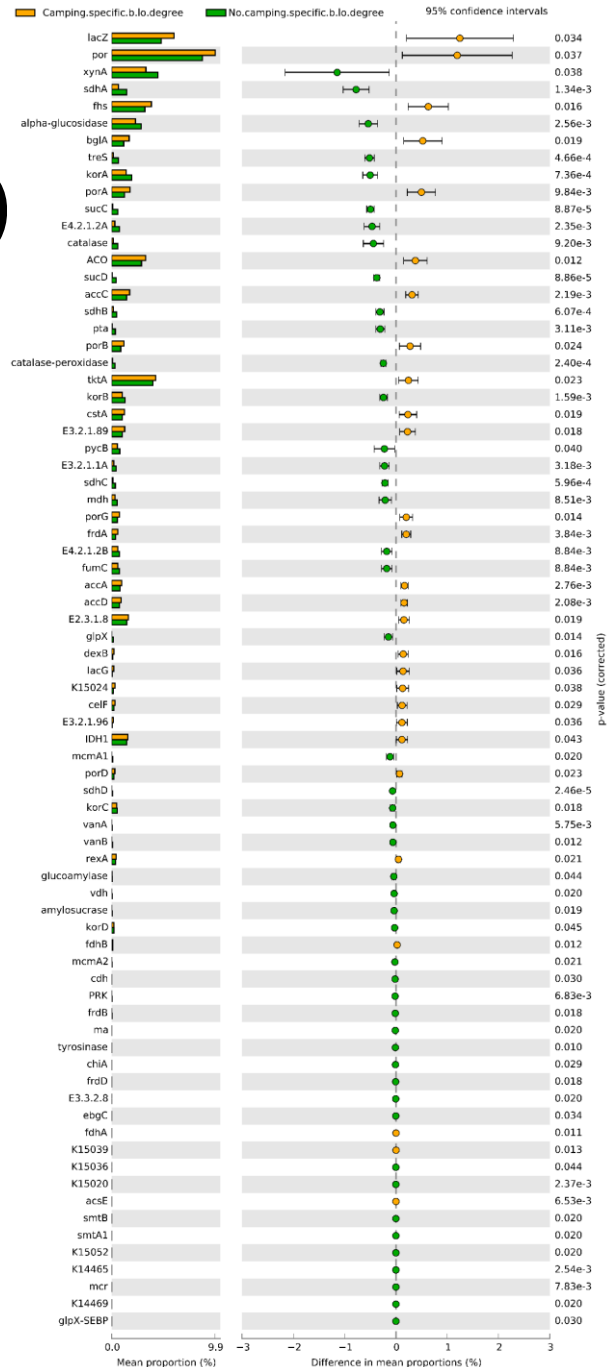

(c)

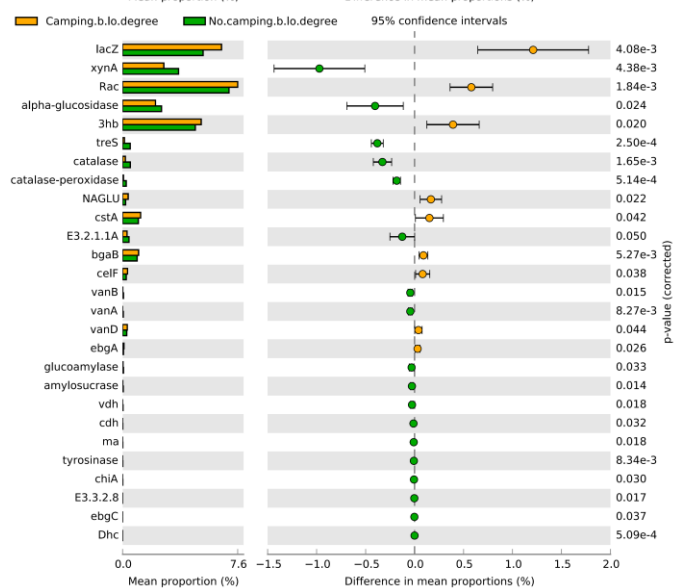

(d)

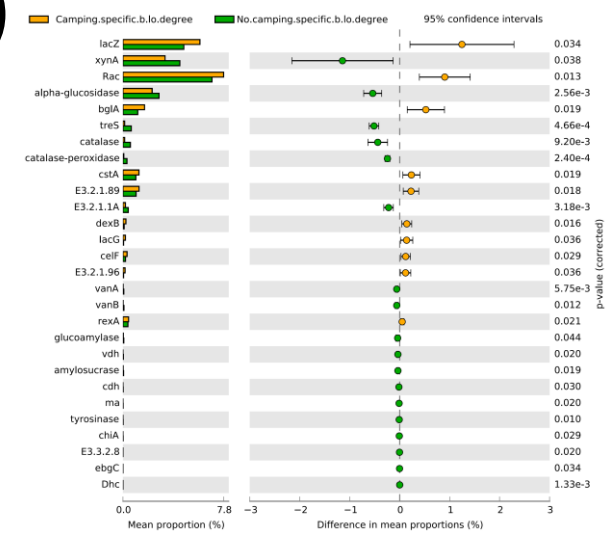

(e)

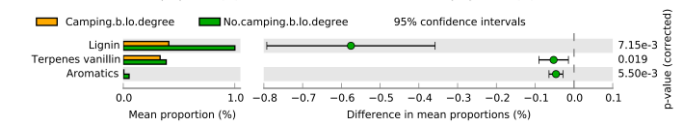

(f)

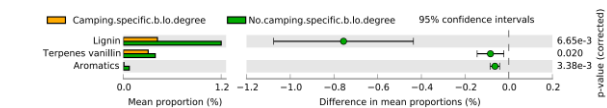

(g)

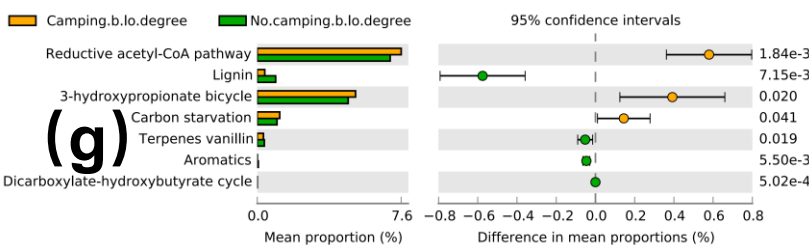

(h)

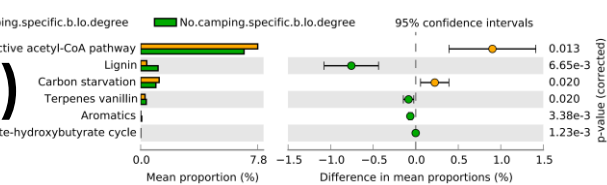

Supplement: Supplementary_Materials_of_Ding_L_et_al_.zip [file Supplementary_Materials_of_Ding_L_et_al_.zip]

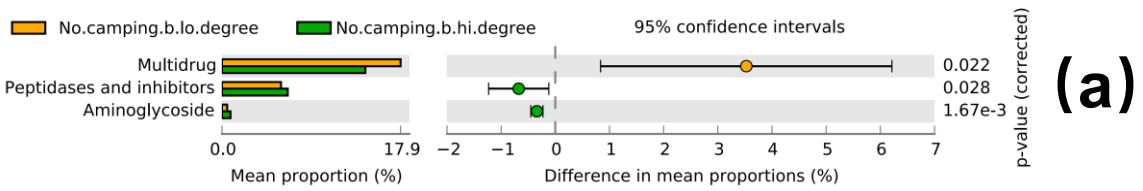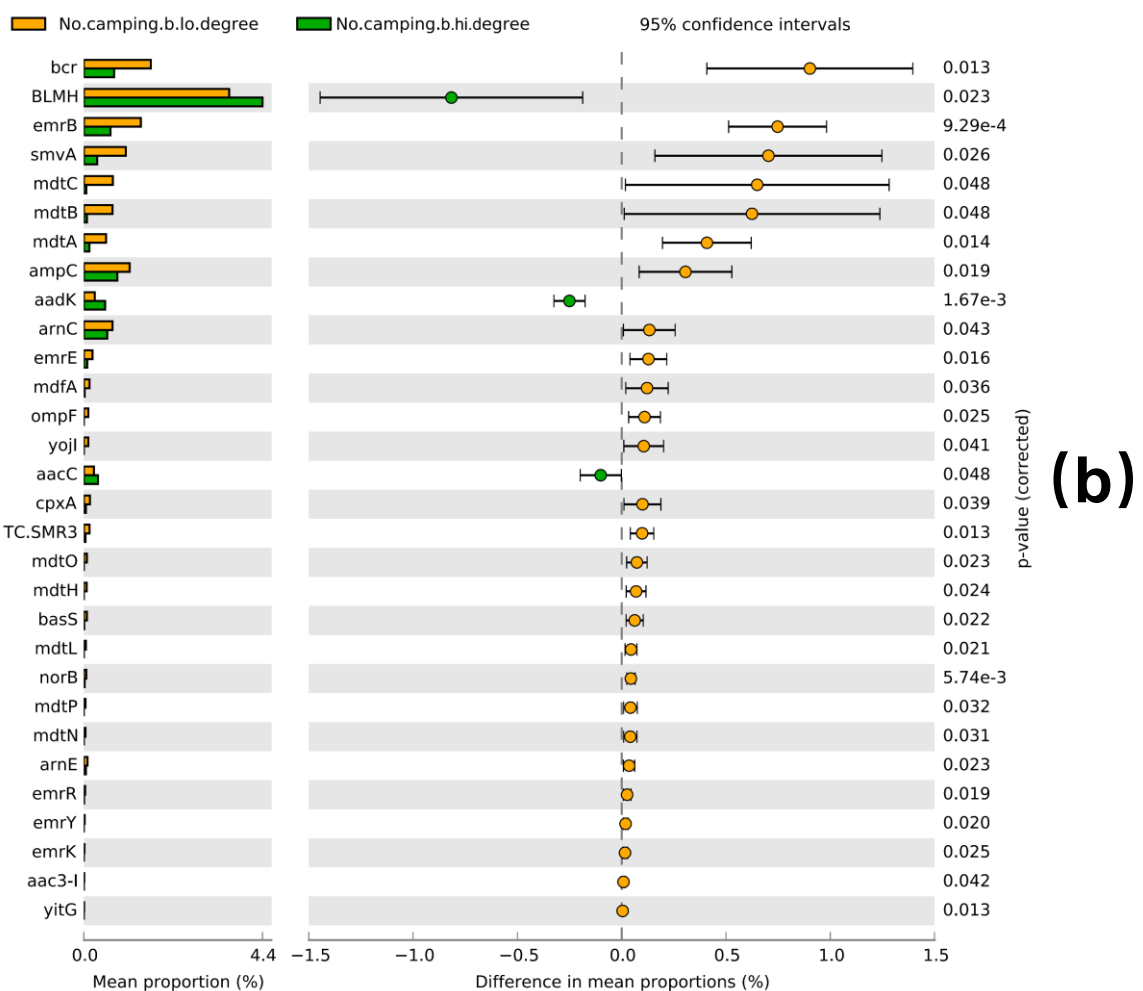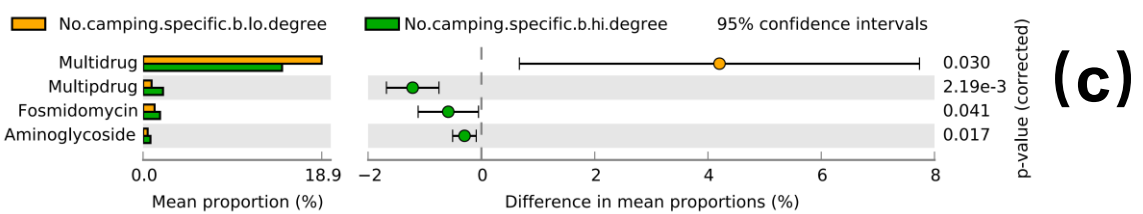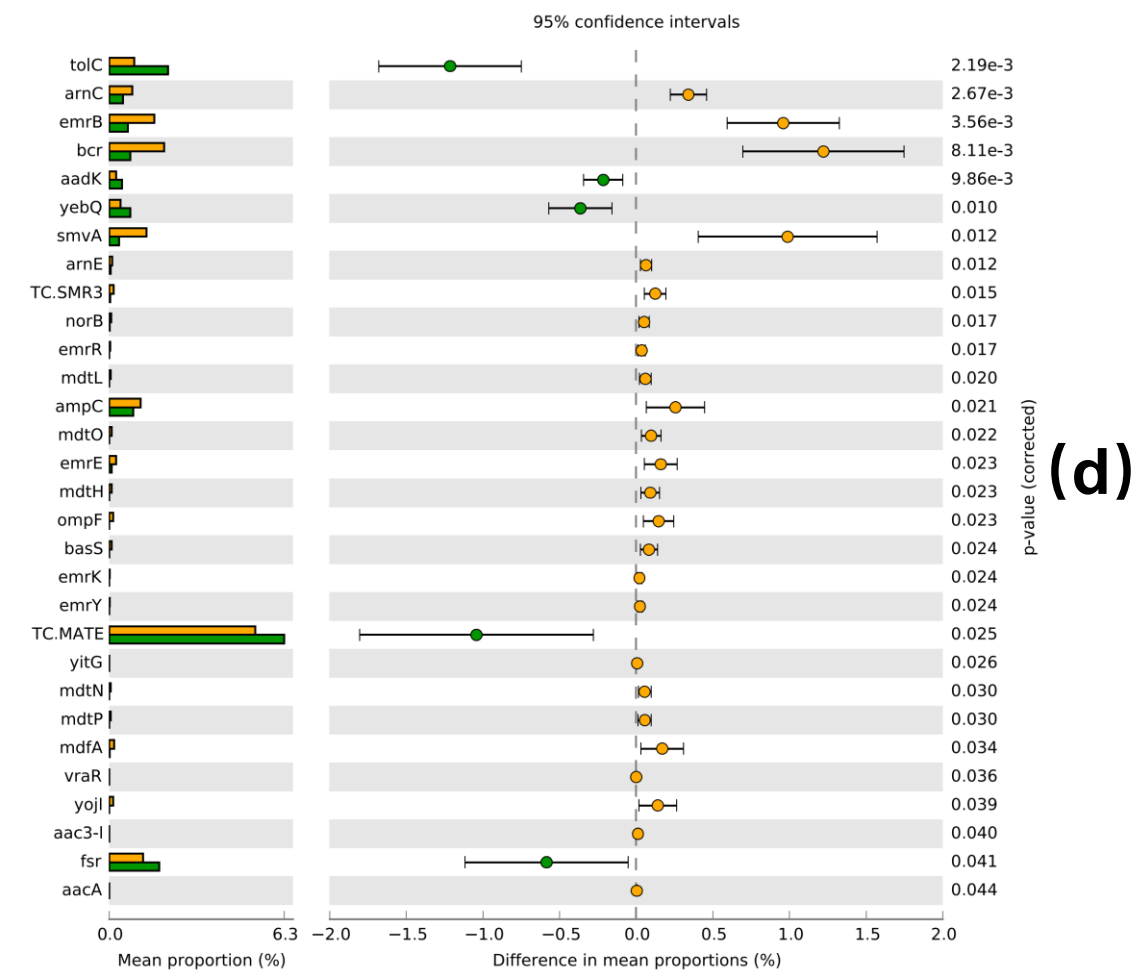

Supplement: Supplementary_Materials_of_Ding_L_et_al_.zip [file Supplementary_Materials_of_Ding_L_et_al_.zip]

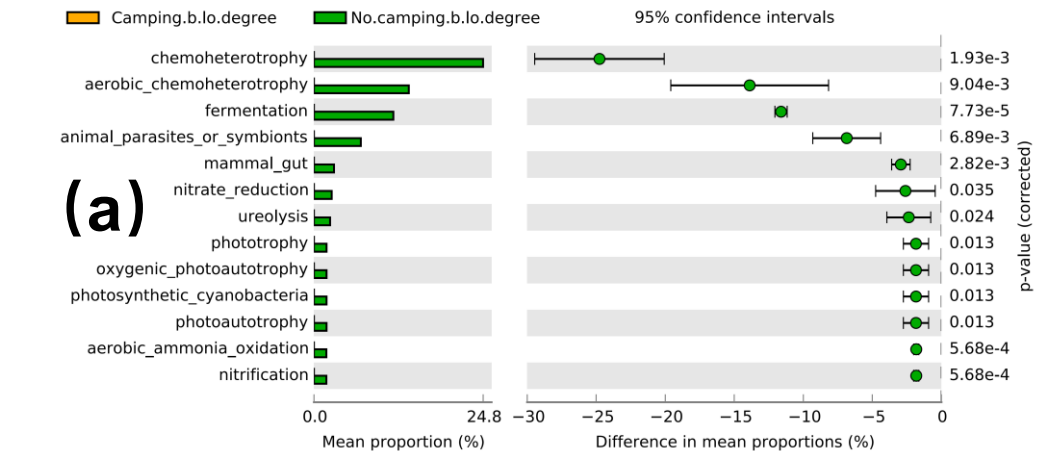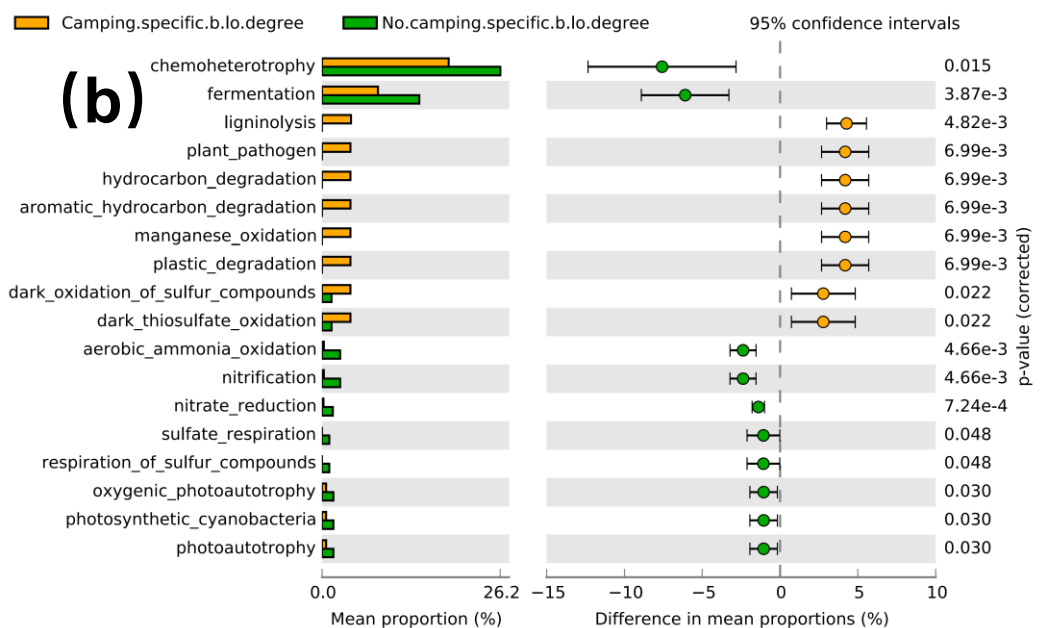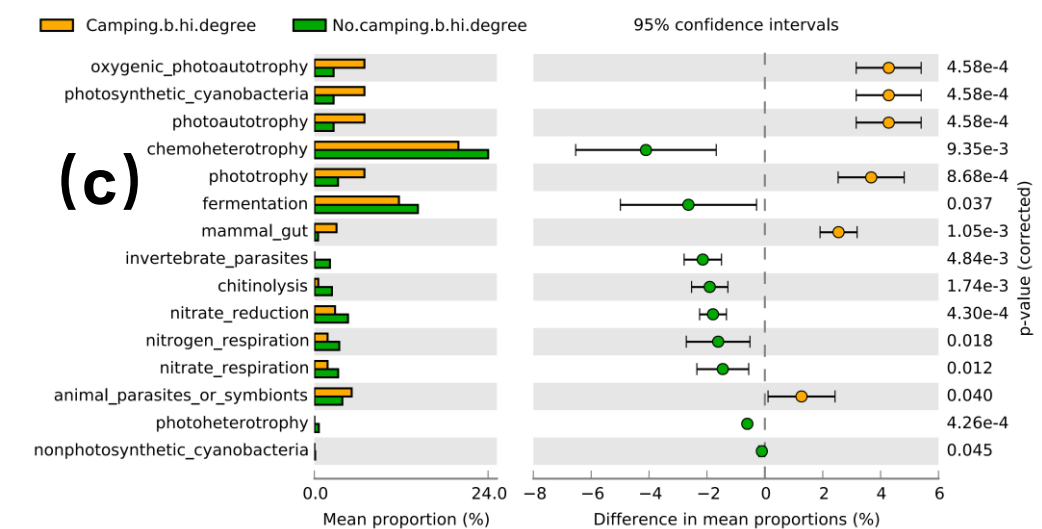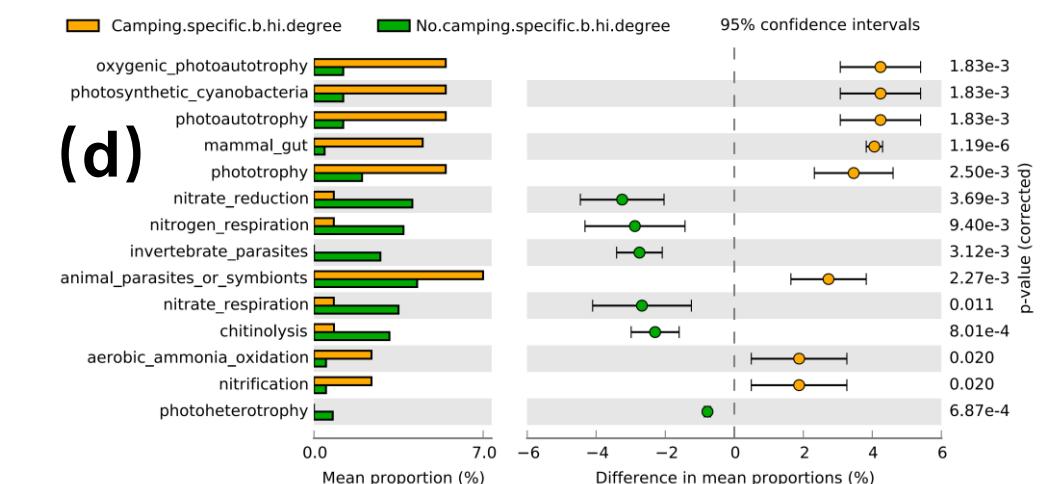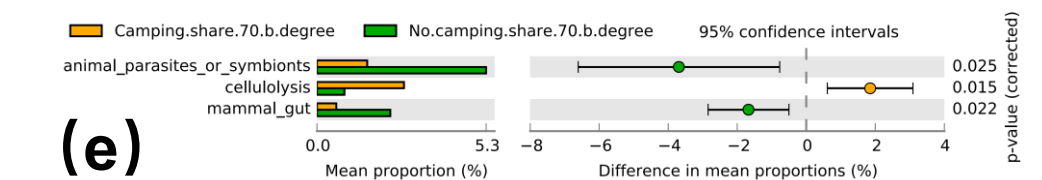

Supplement: Supplementary_Materials_of_Ding_L_et_al_.zip [file Supplementary_Materials_of_Ding_L_et_al_.zip]

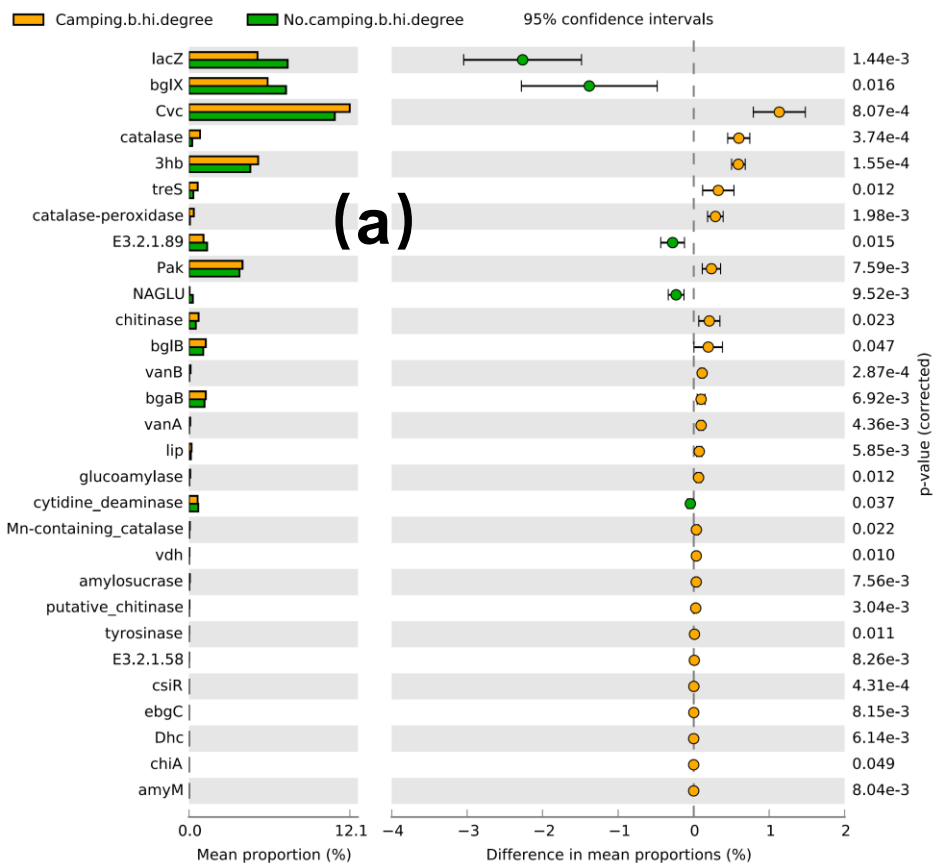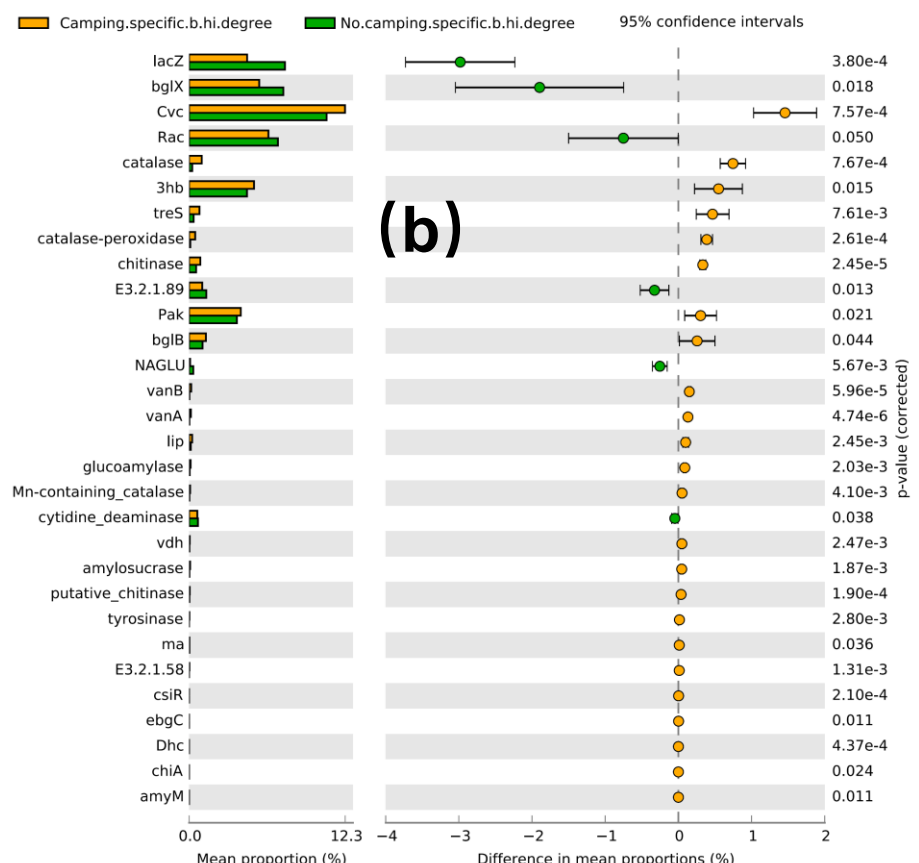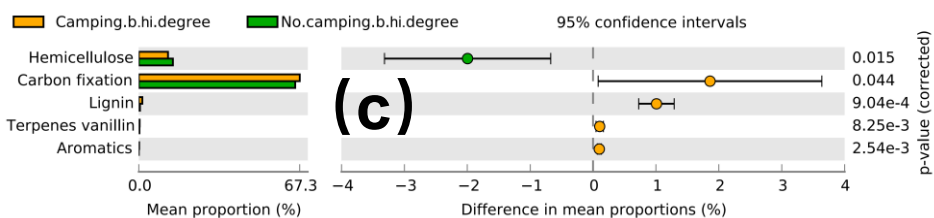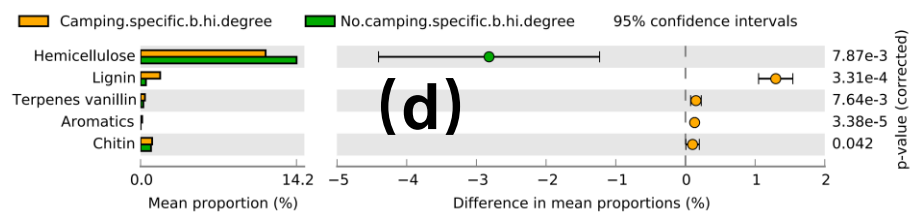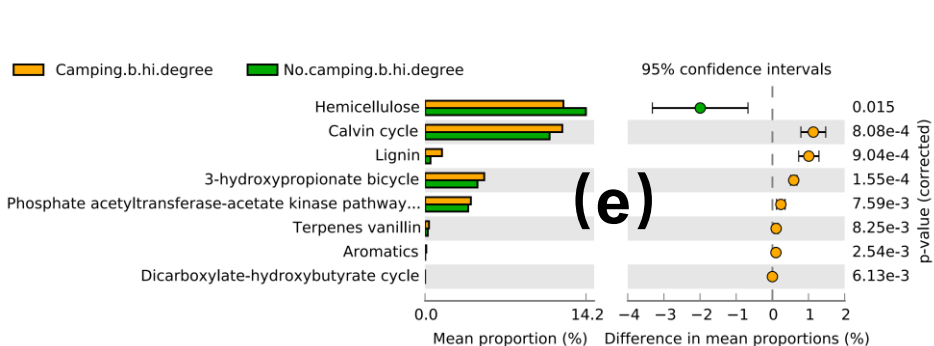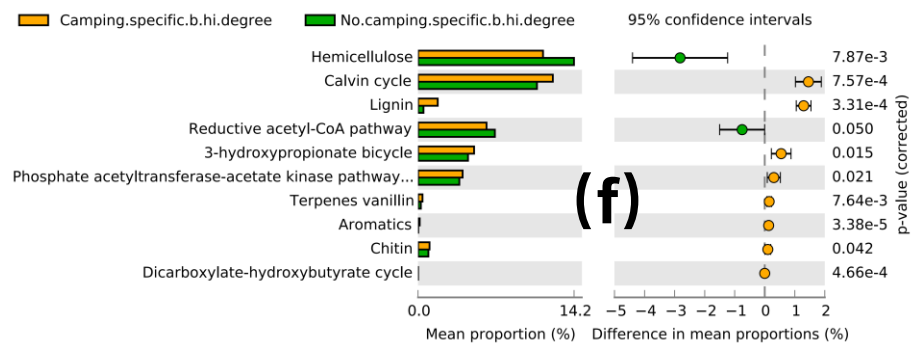

Supplement: Supplementary_Materials_of_Ding_L_et_al_.zip [file Supplementary_Materials_of_Ding_L_et_al_.zip]

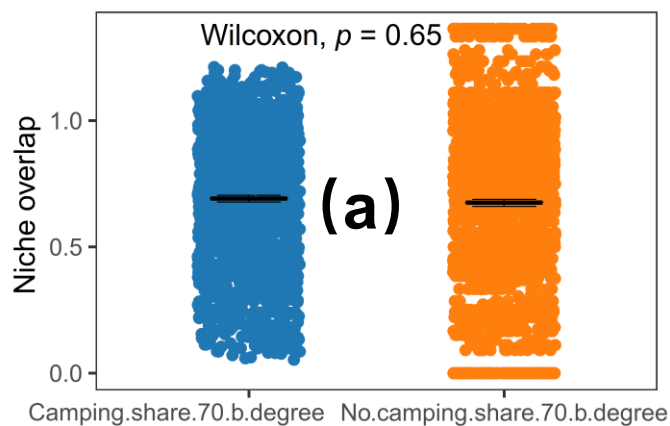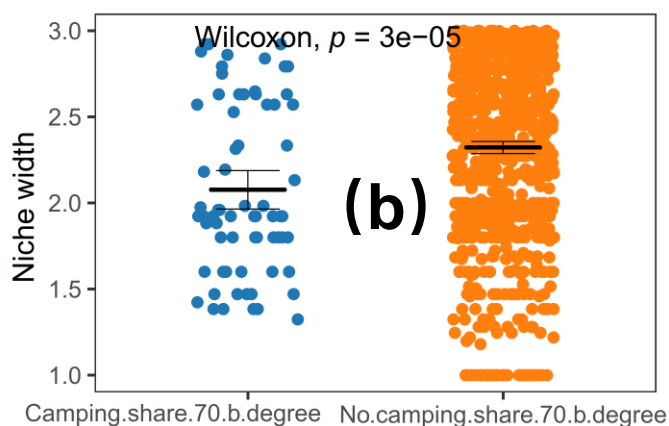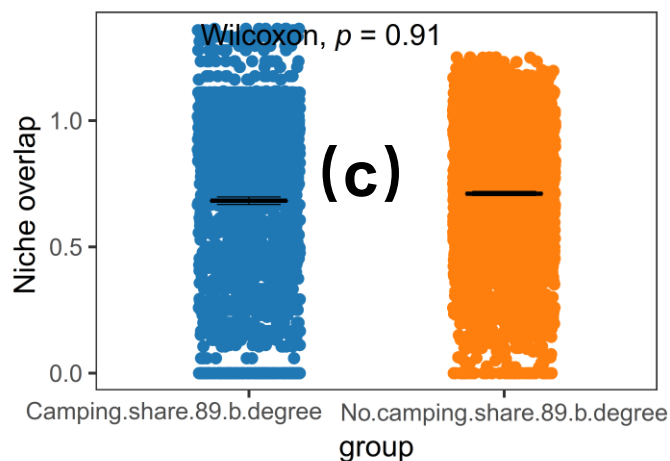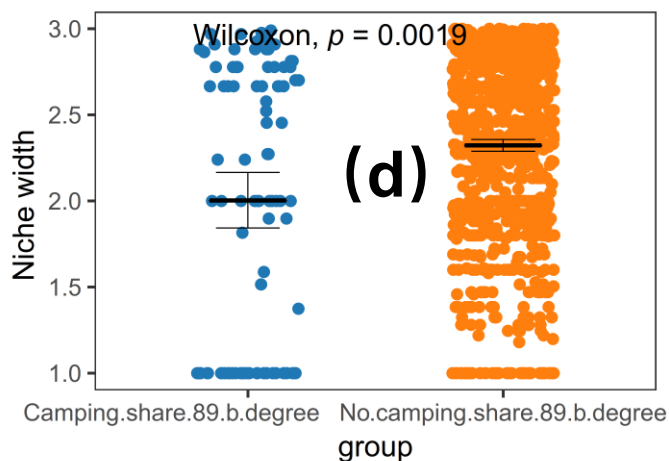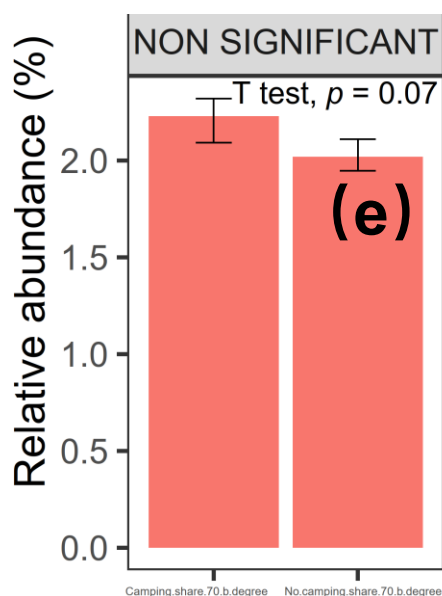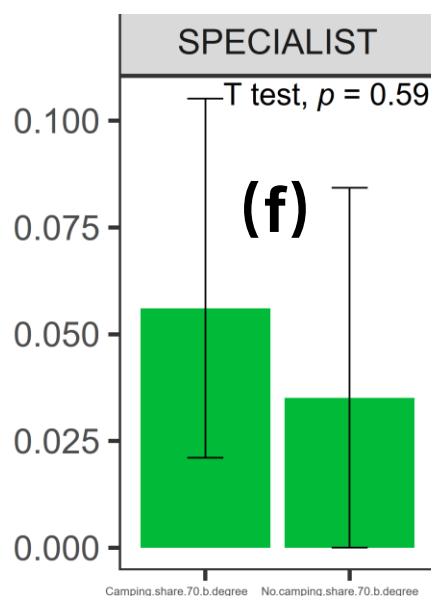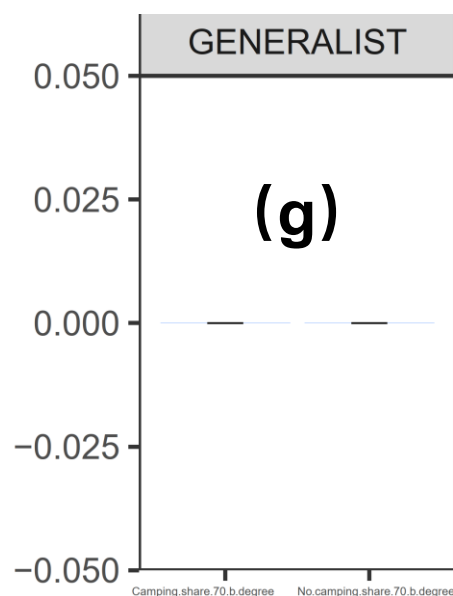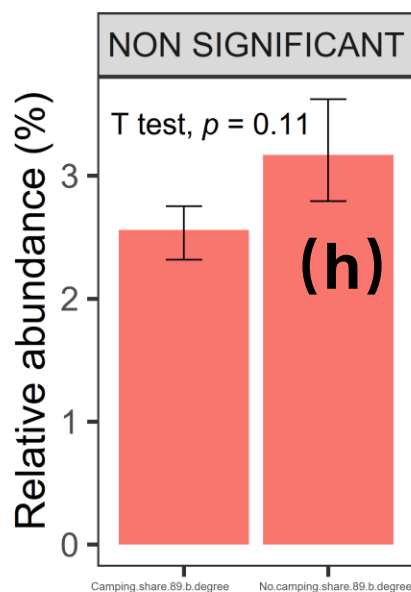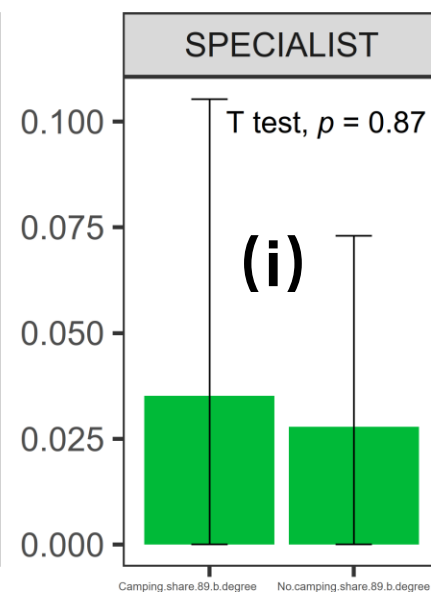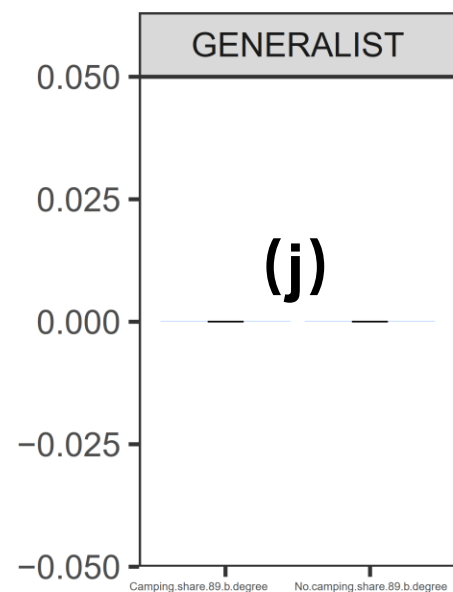

Group

Supplement: Supplementary_Materials_of_Ding_L_et_al_.zip [file Supplementary_Materials_of_Ding_L_et_al_.zip]

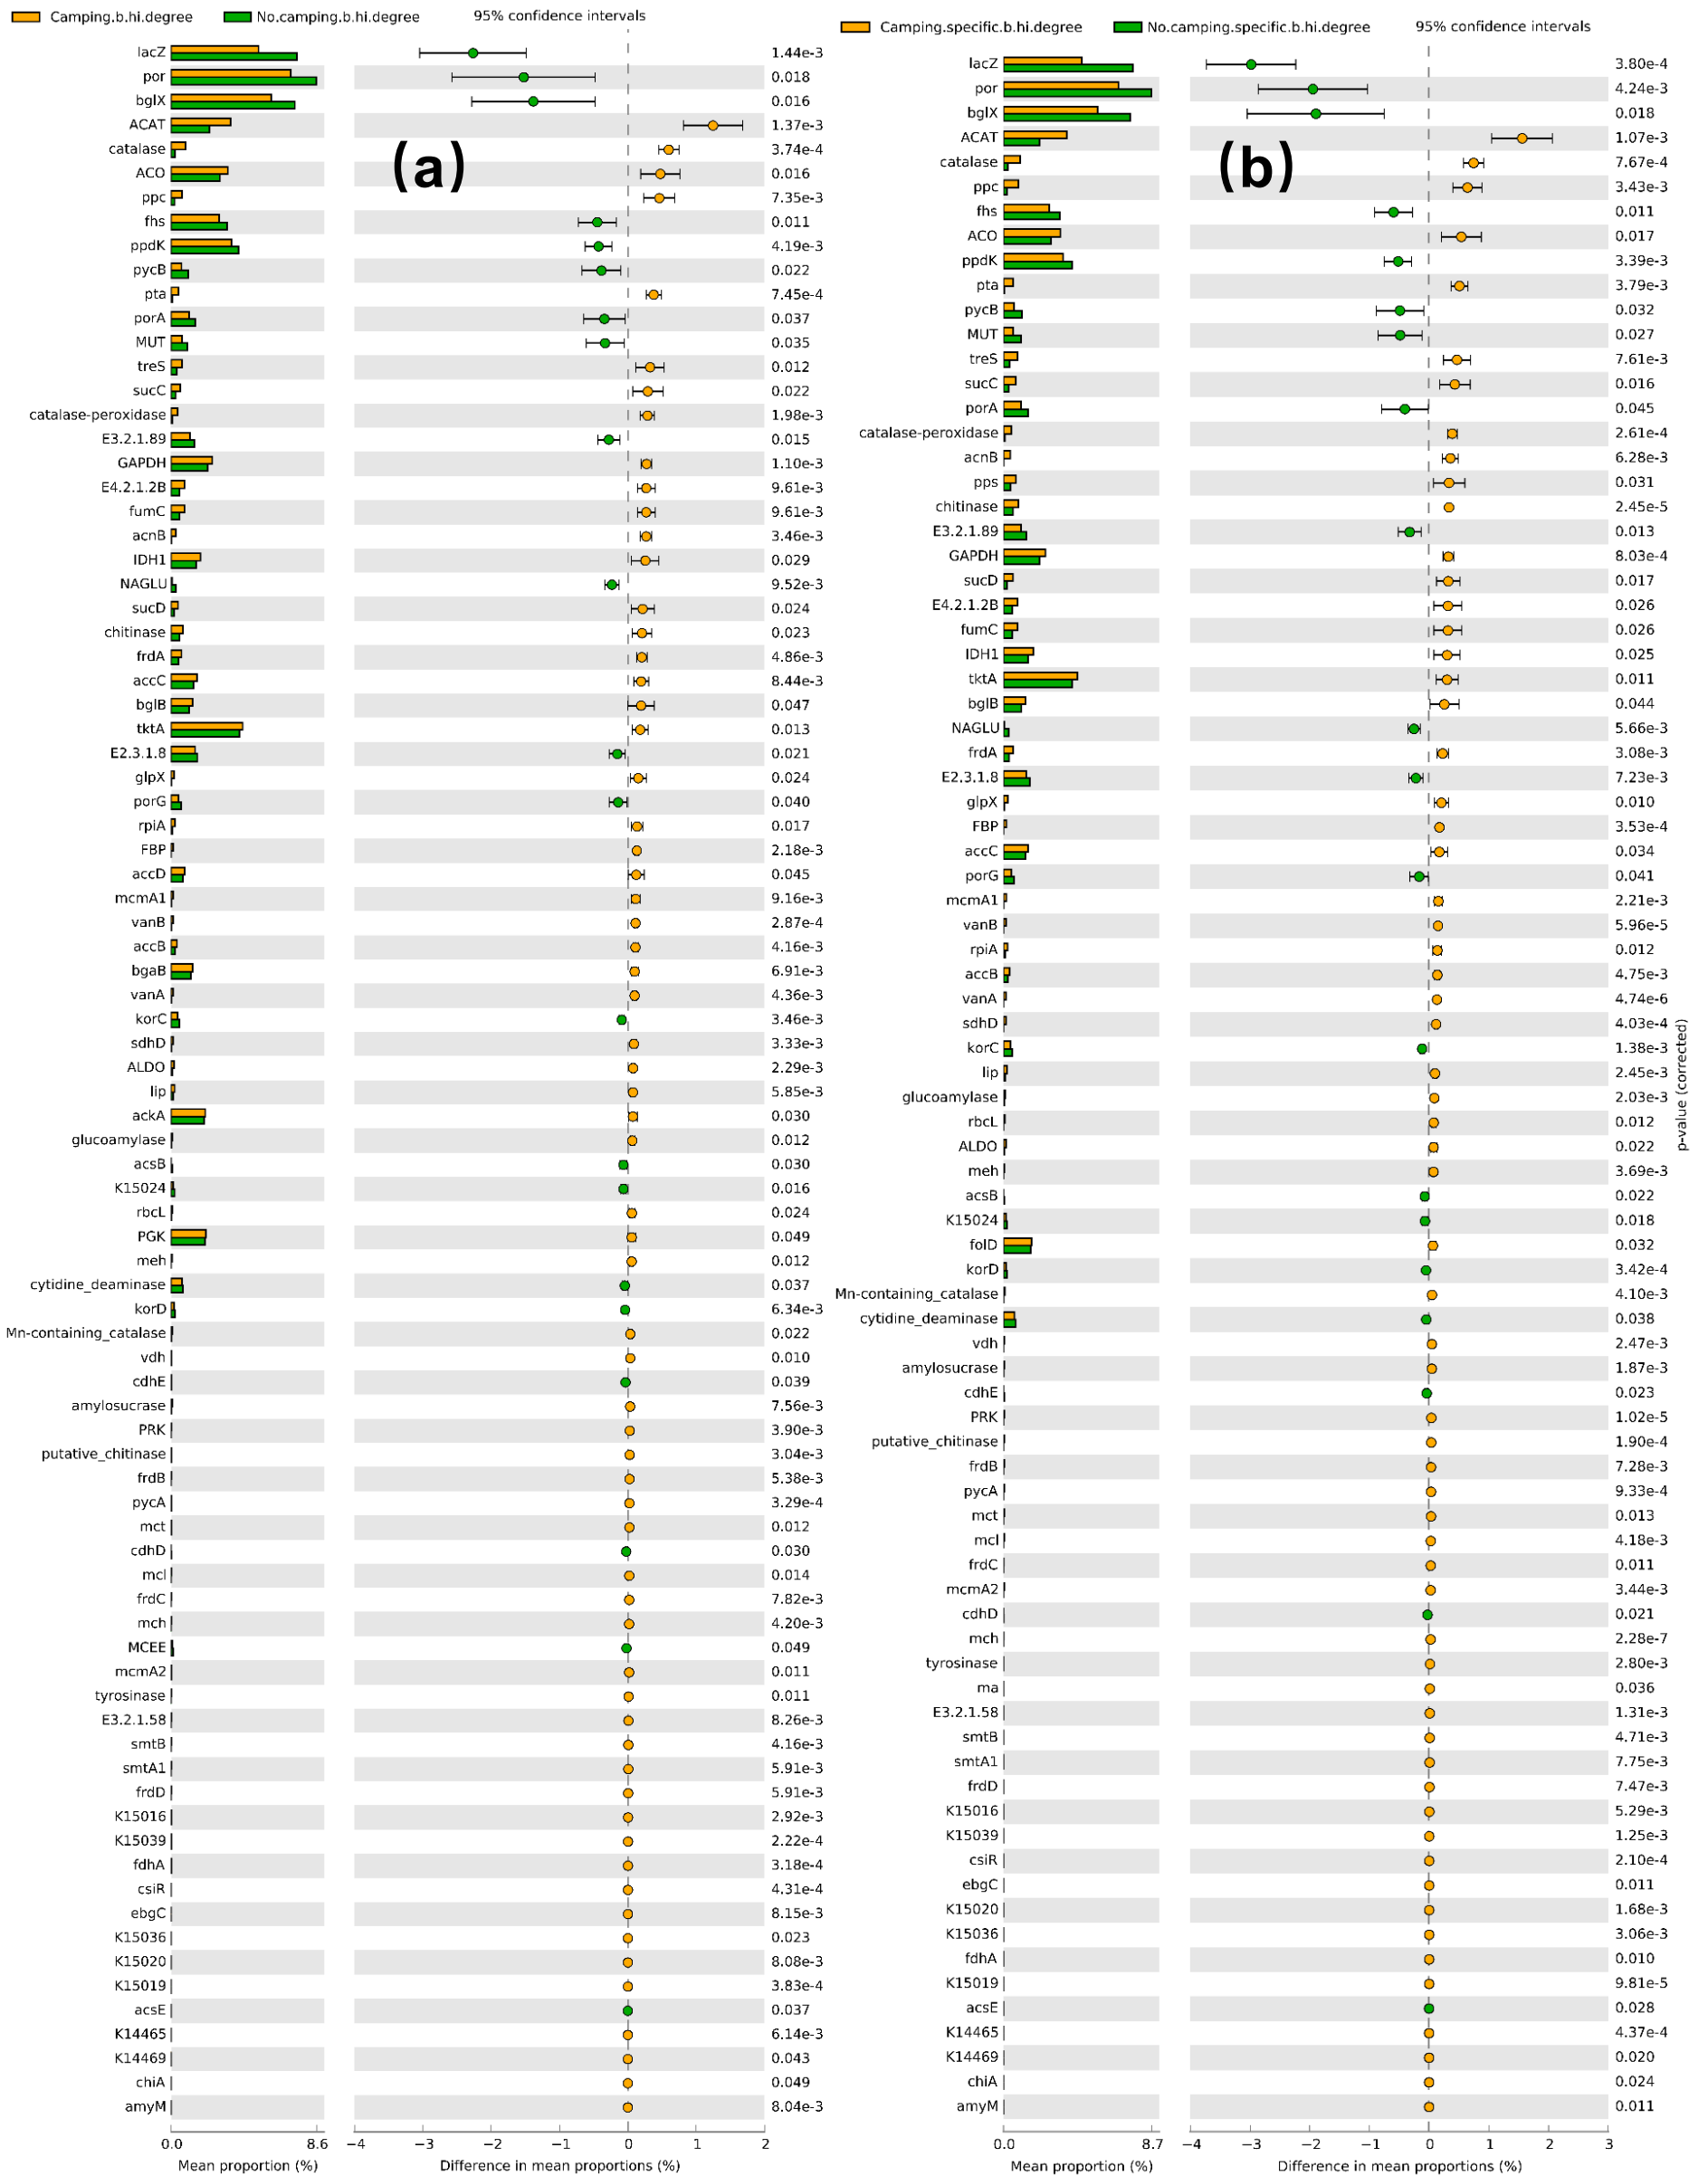

Supplement: Supplementary_Materials_of_Ding_L_et_al_.zip [file Supplementary_Materials_of_Ding_L_et_al_.zip]

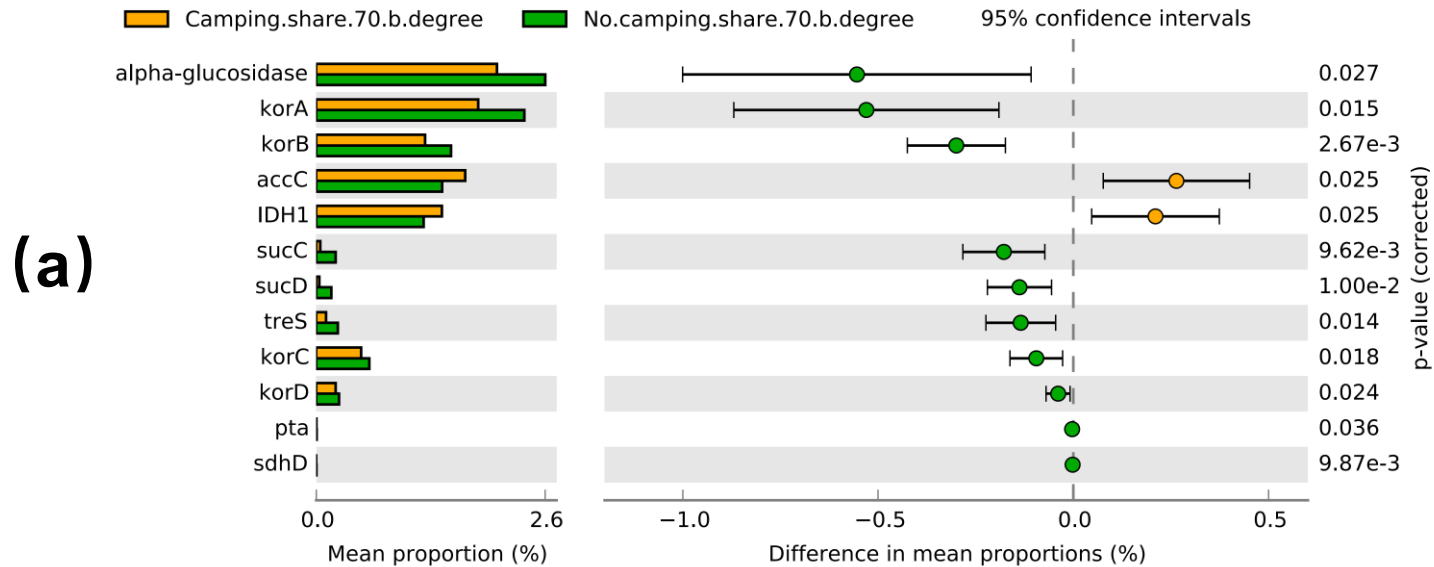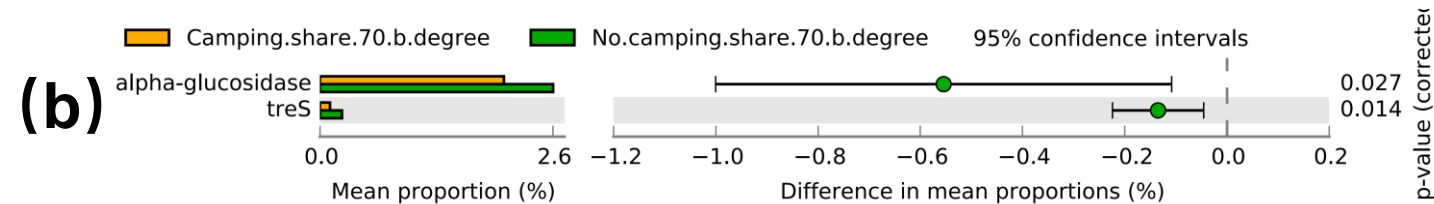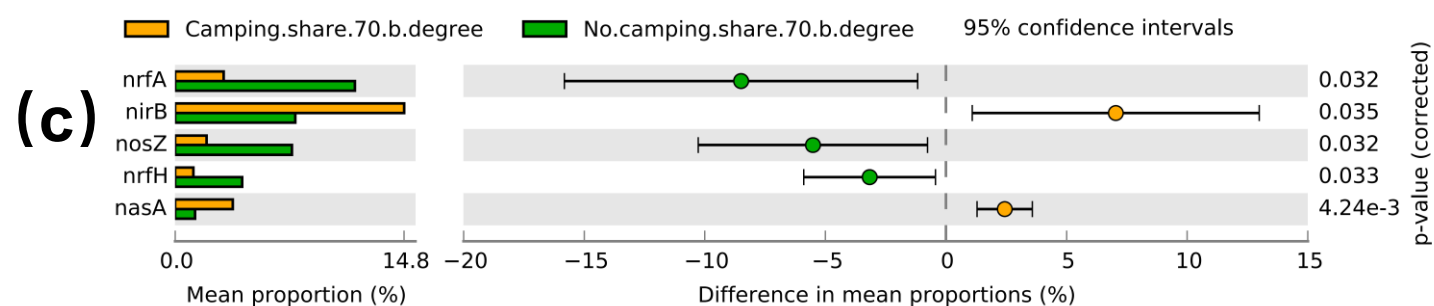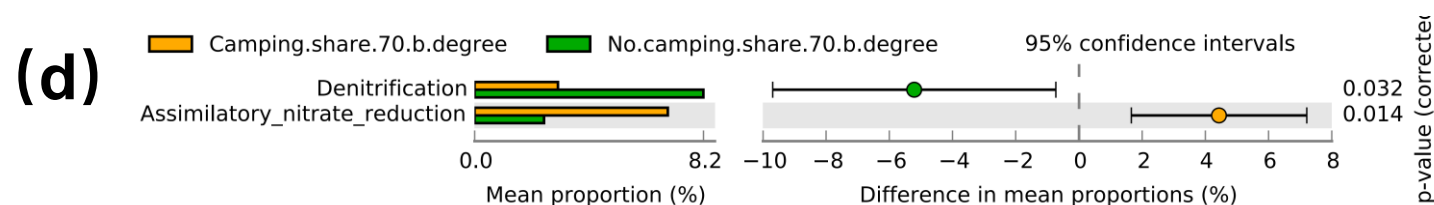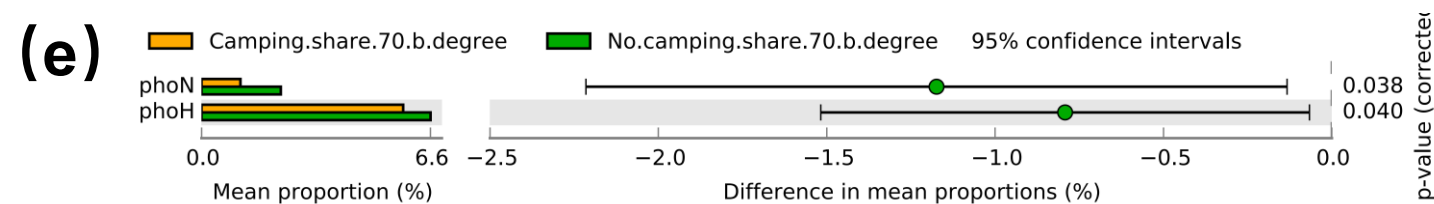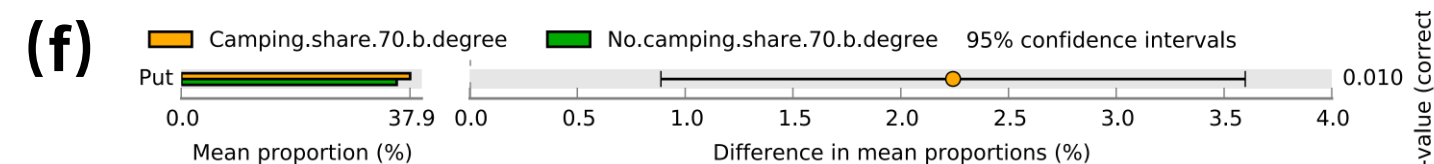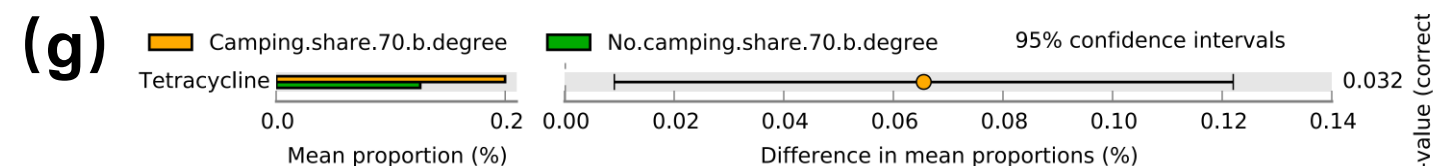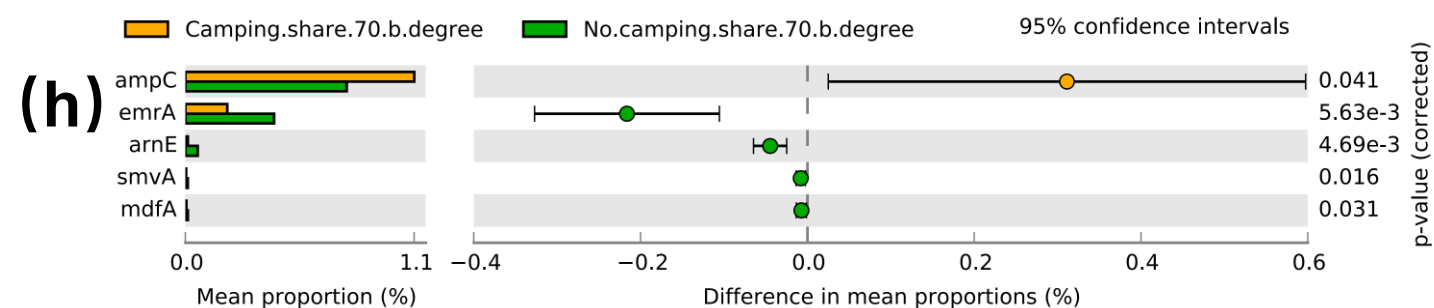

Supplement: Supplementary_Materials_of_Ding_L_et_al_.zip [file Supplementary_Materials_of_Ding_L_et_al_.zip]

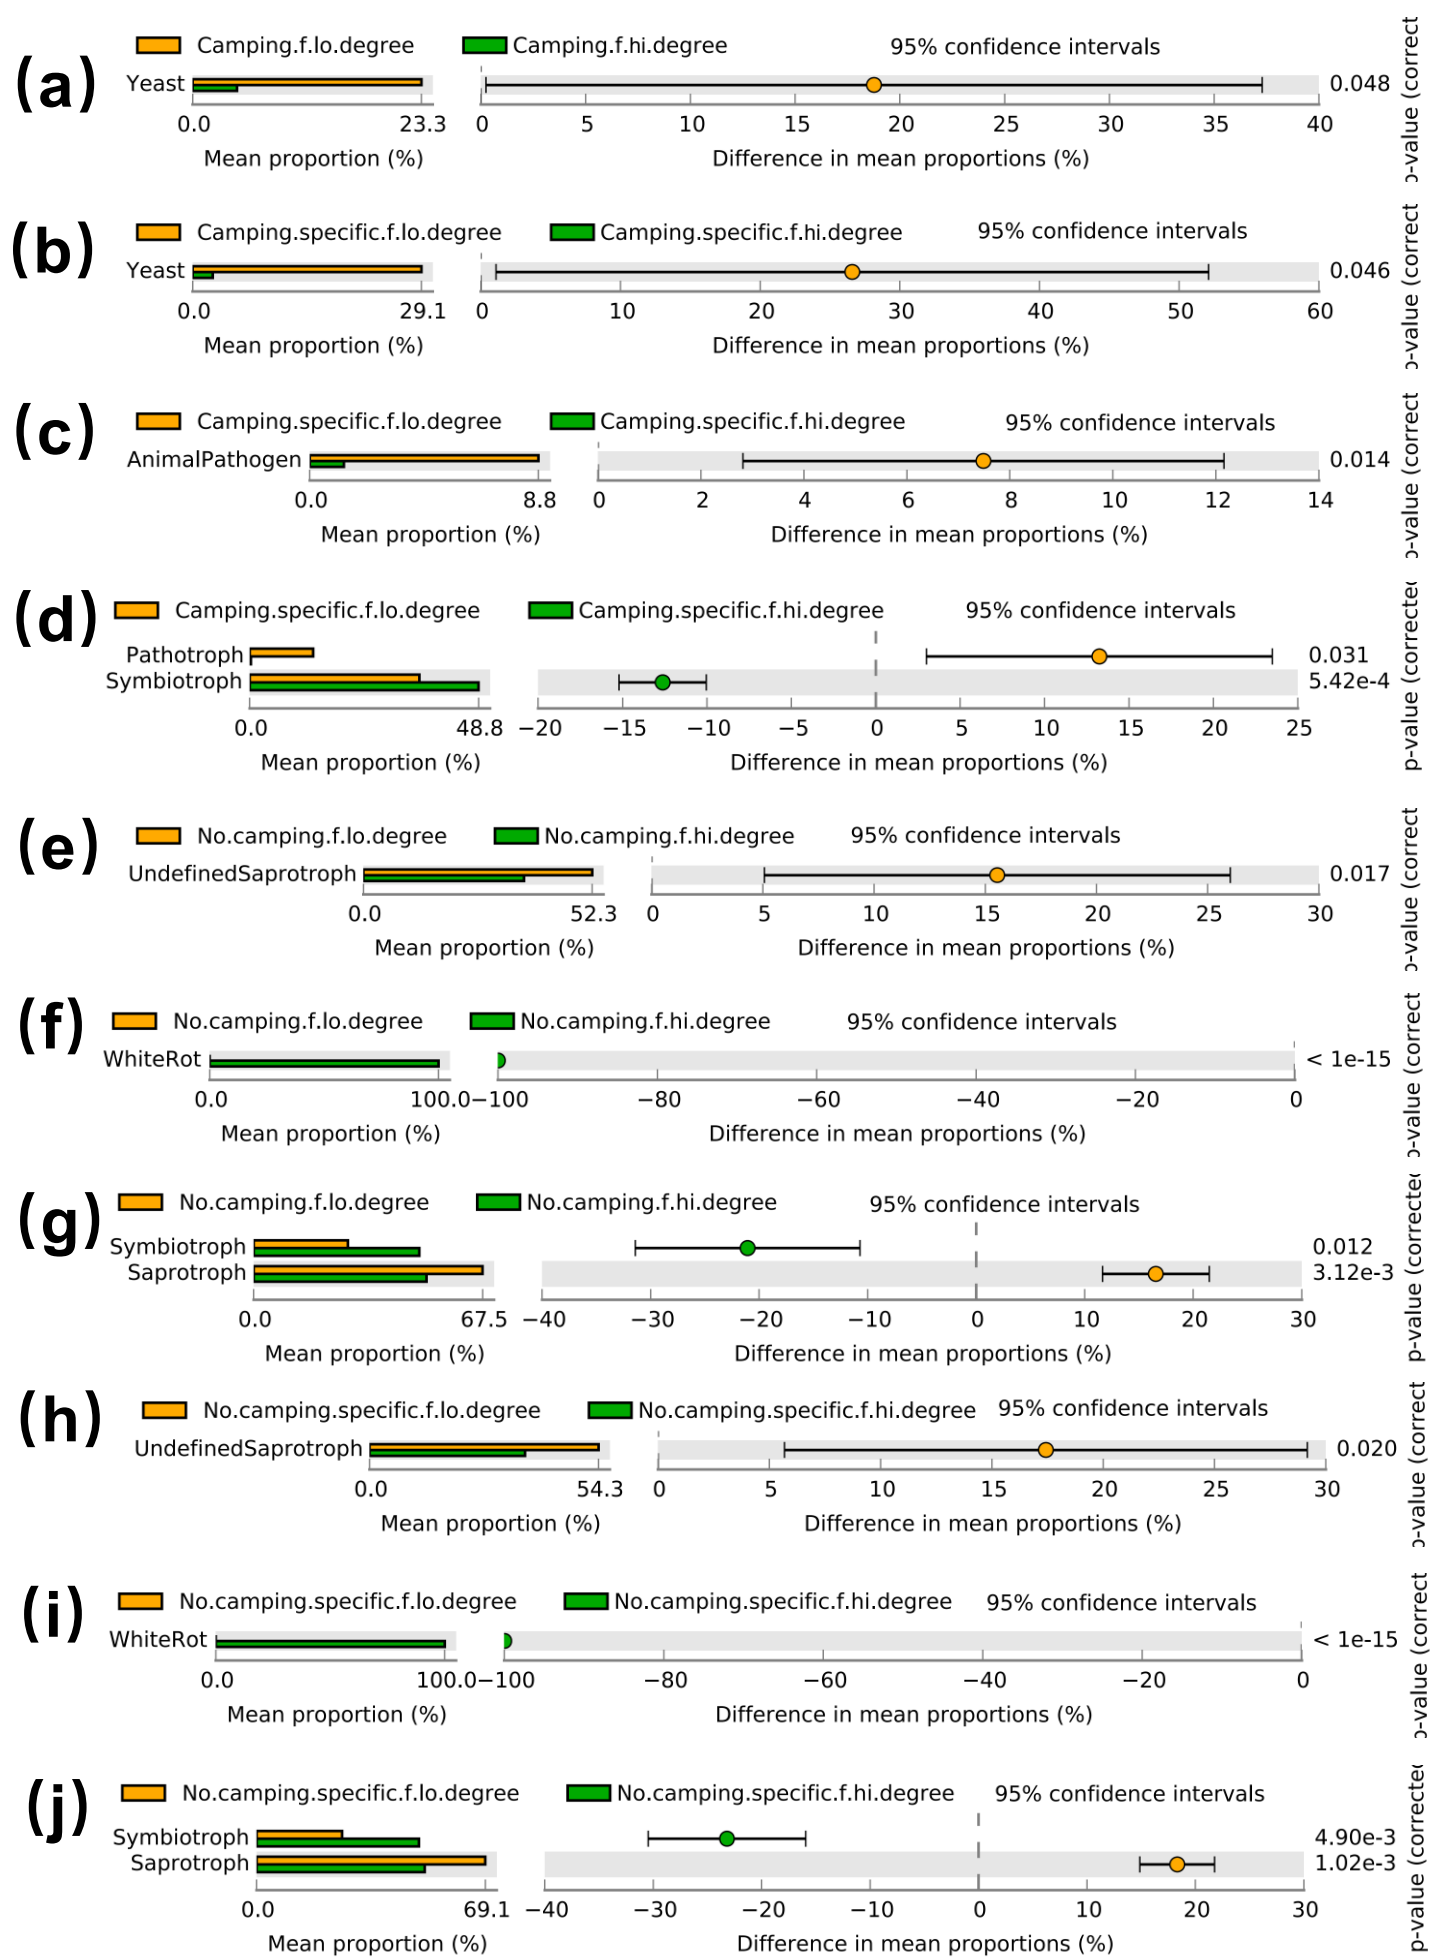

Supplement: Supplementary_Materials_of_Ding_L_et_al_.zip [file Supplementary_Materials_of_Ding_L_et_al_.zip]

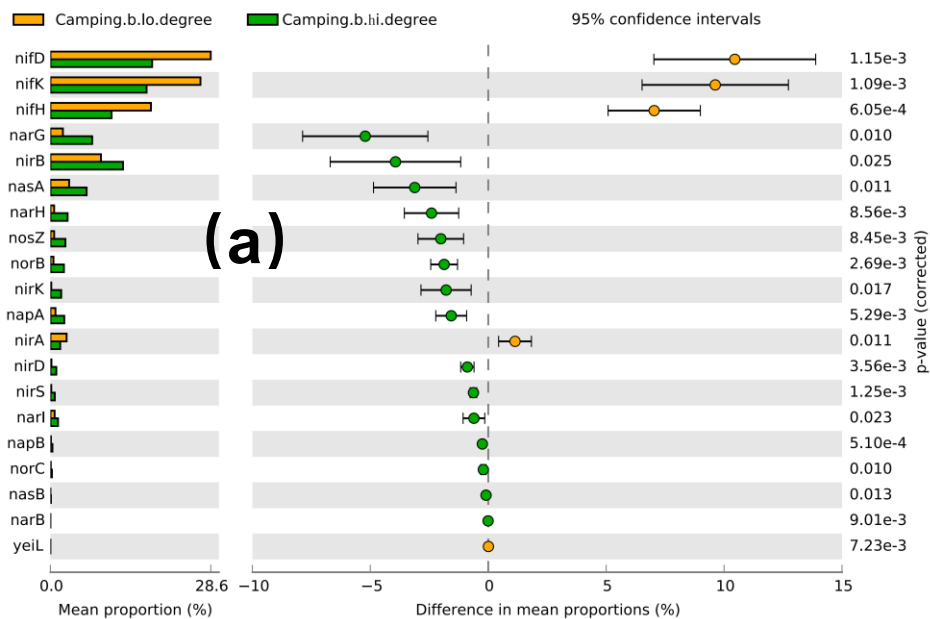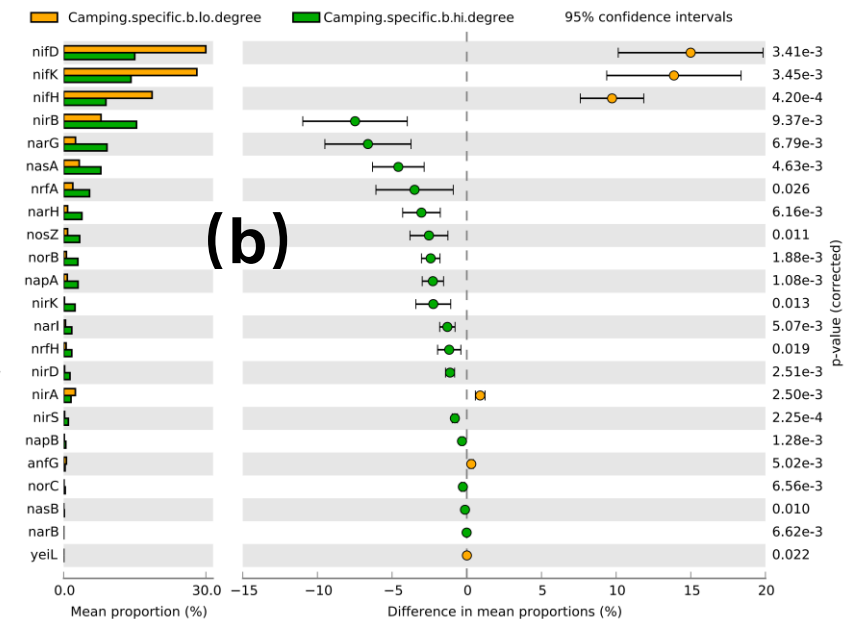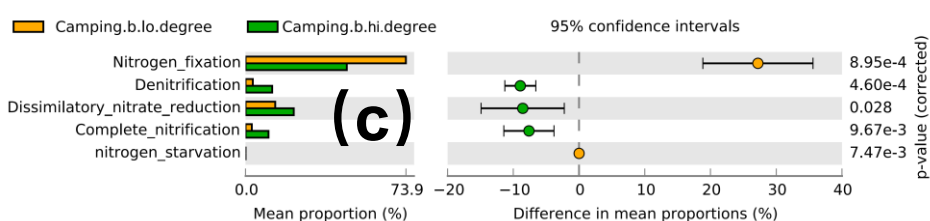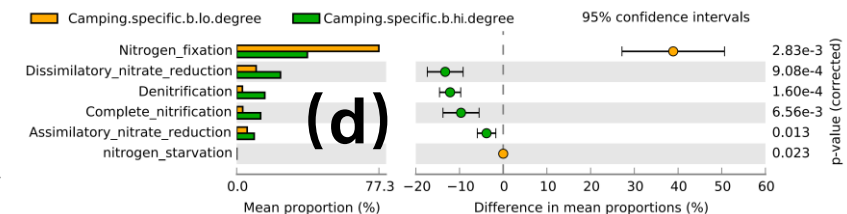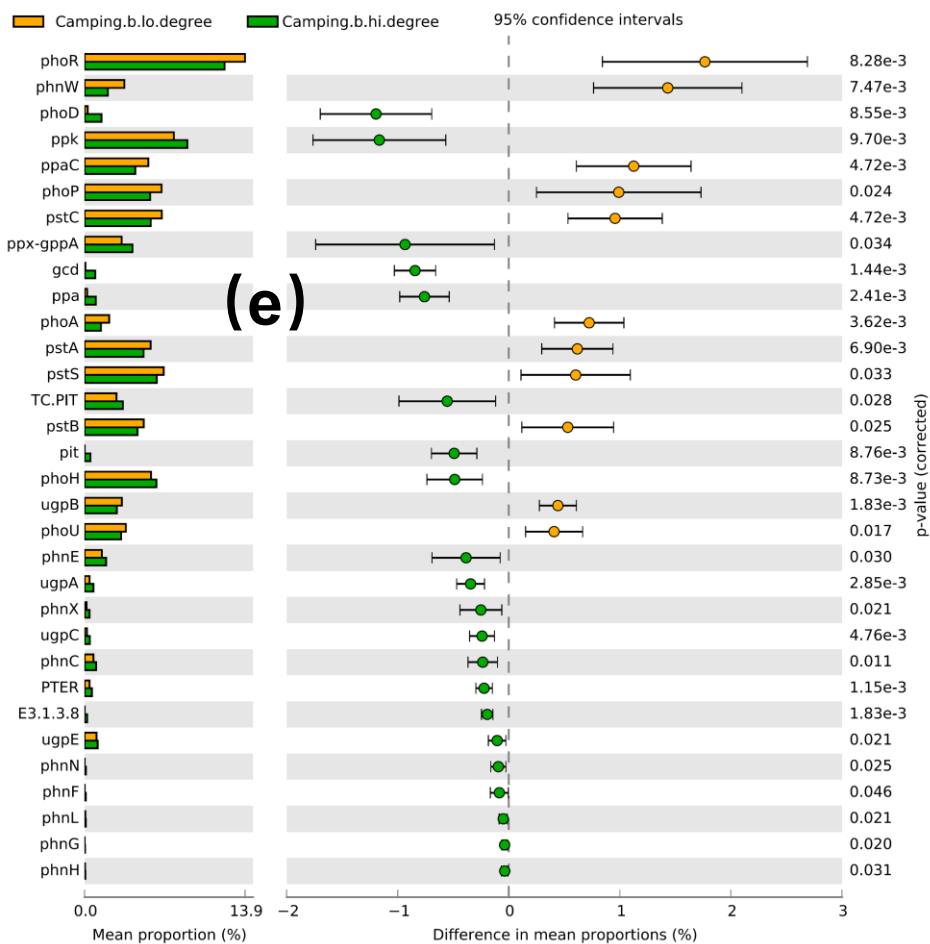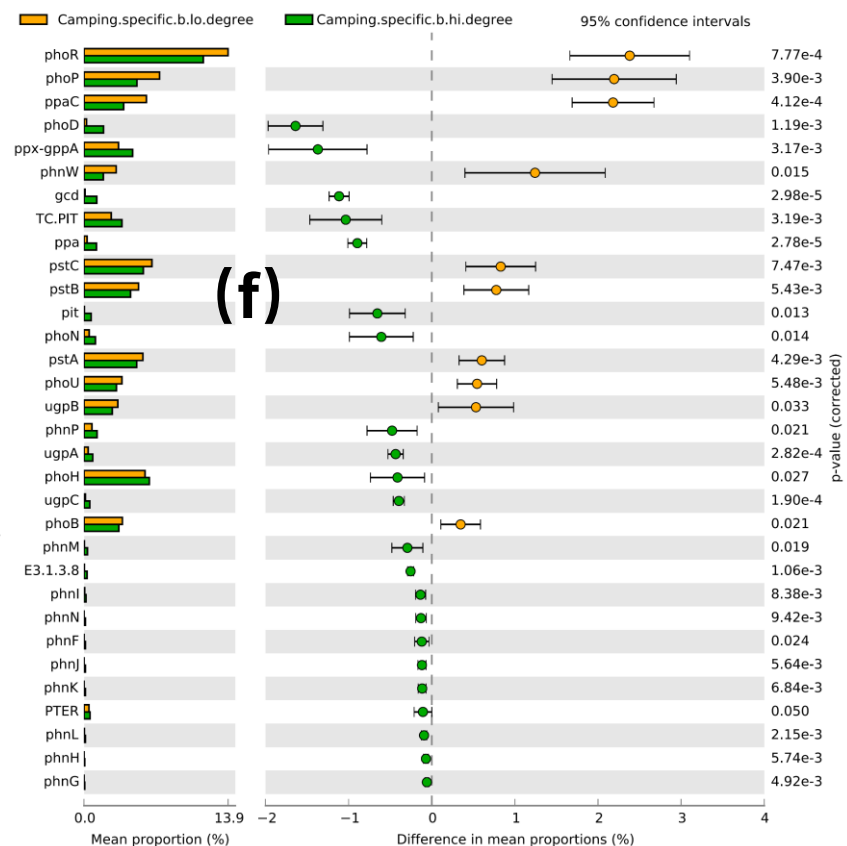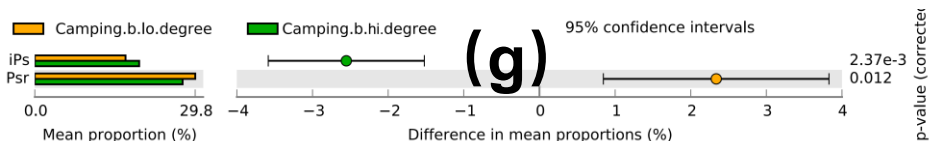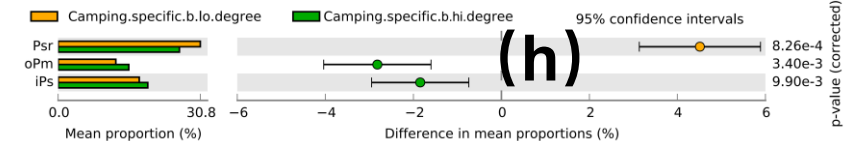

Supplement: Supplementary_Materials_of_Ding_L_et_al_.zip [file Supplementary_Materials_of_Ding_L_et_al_.zip]

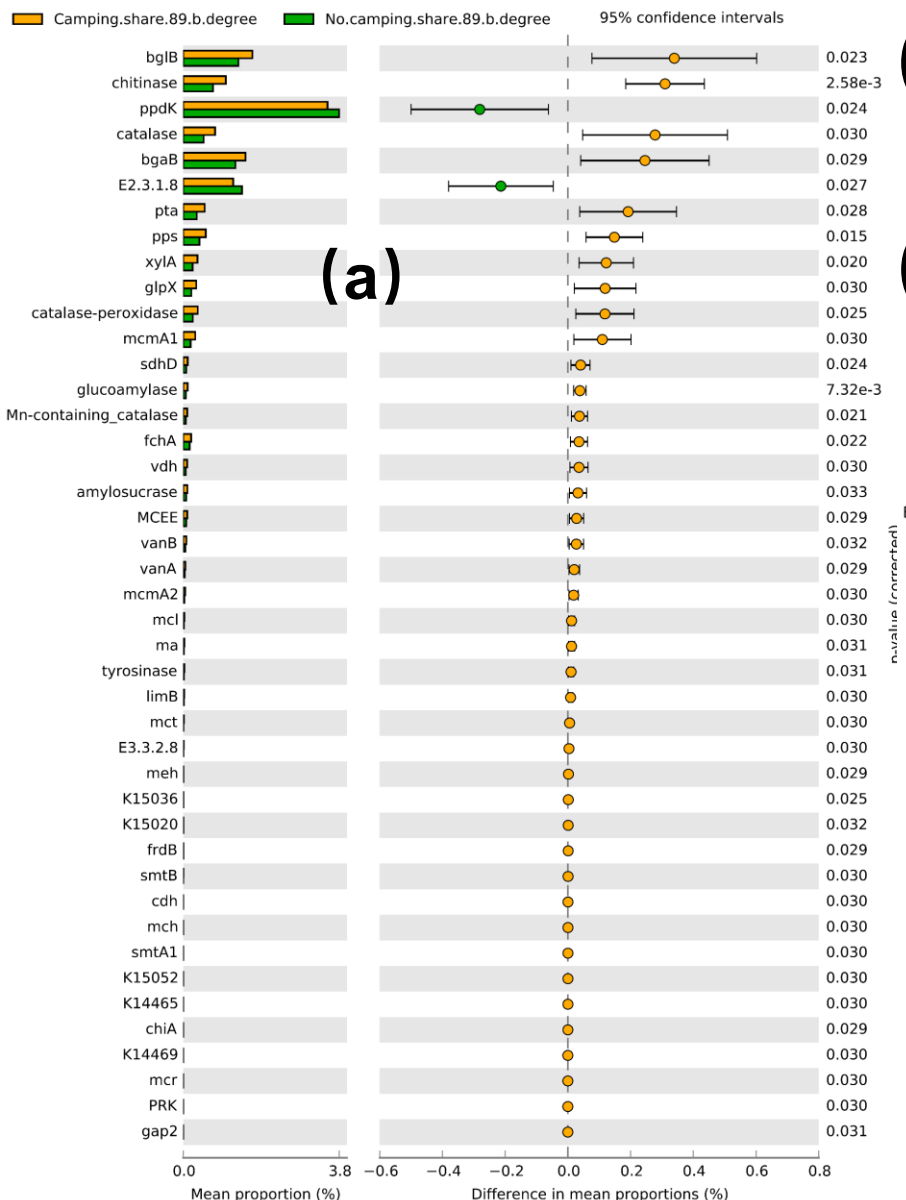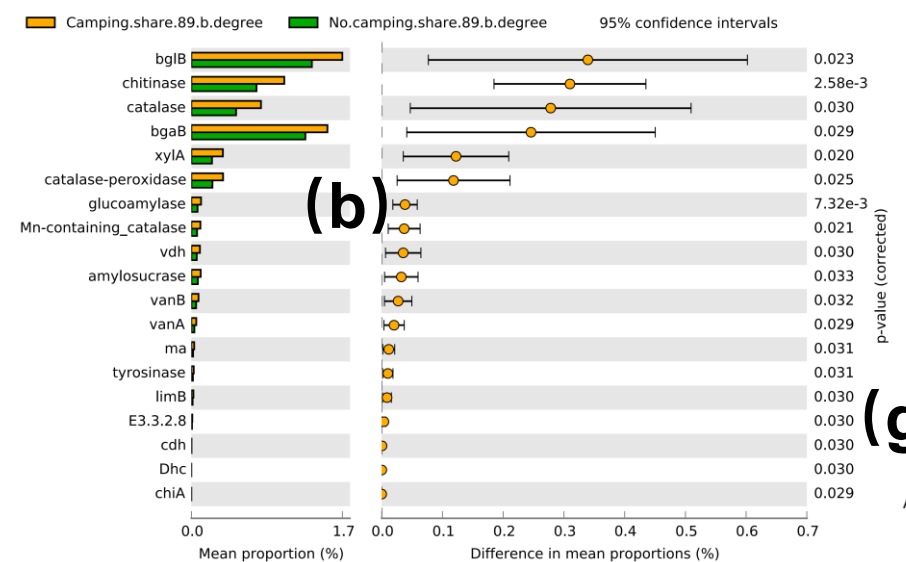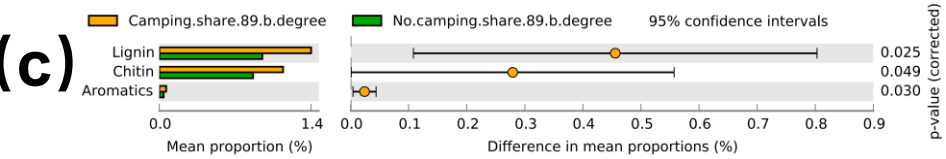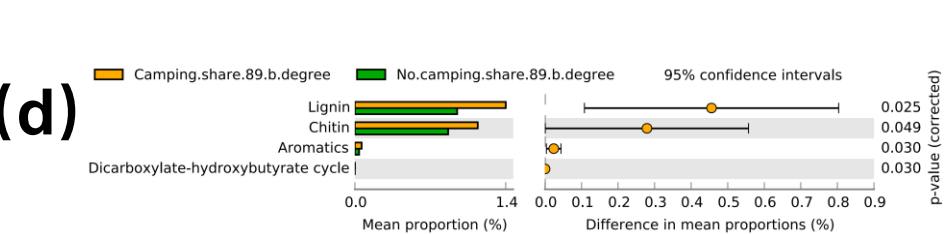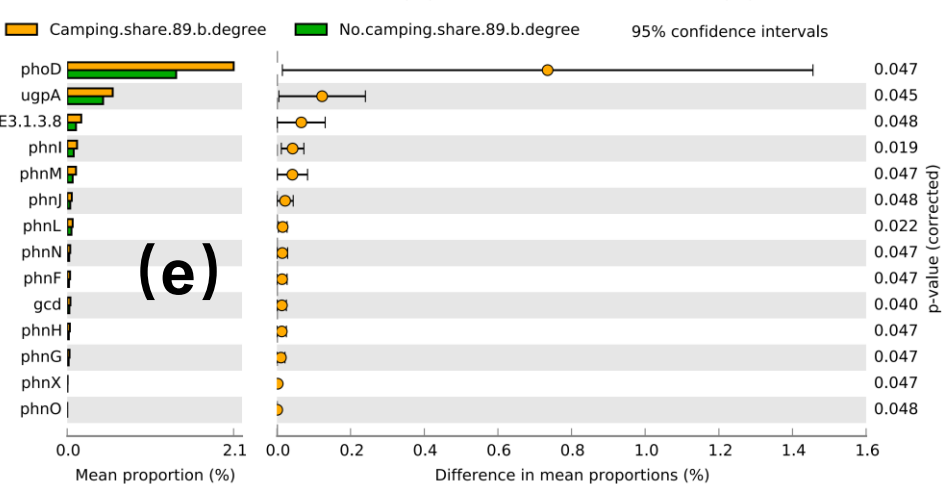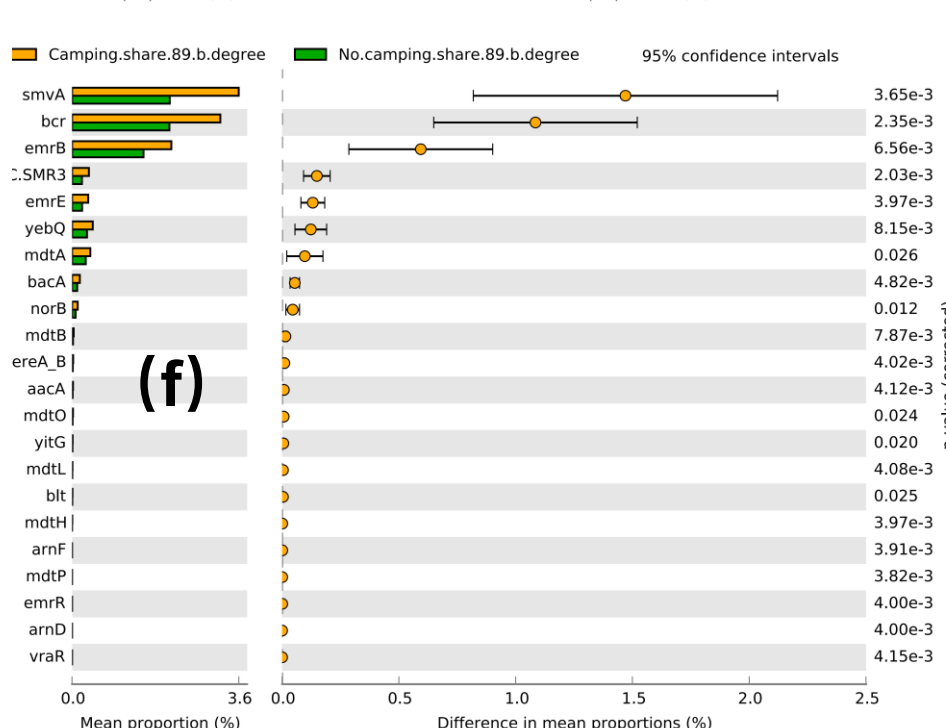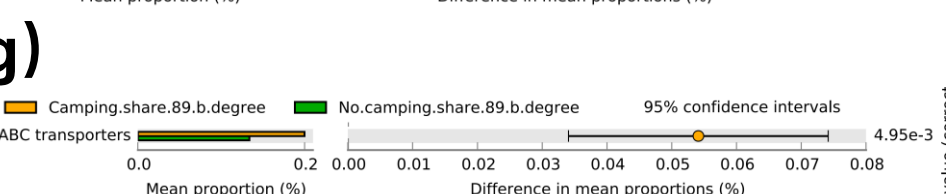

Supplement: Supplementary_Materials_of_Ding_L_et_al_.zip [file Supplementary_Materials_of_Ding_L_et_al_.zip]

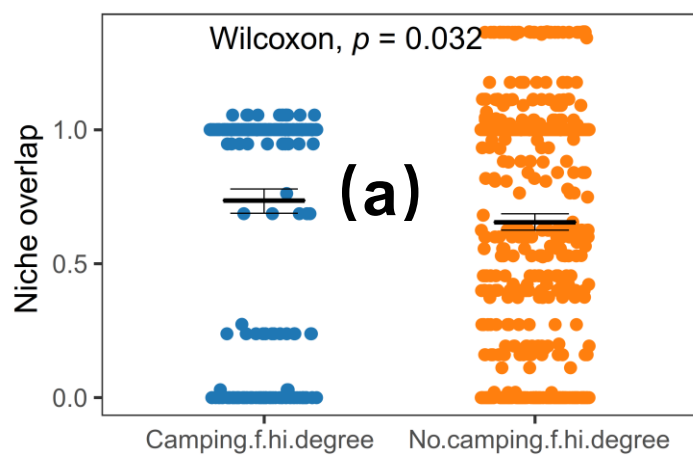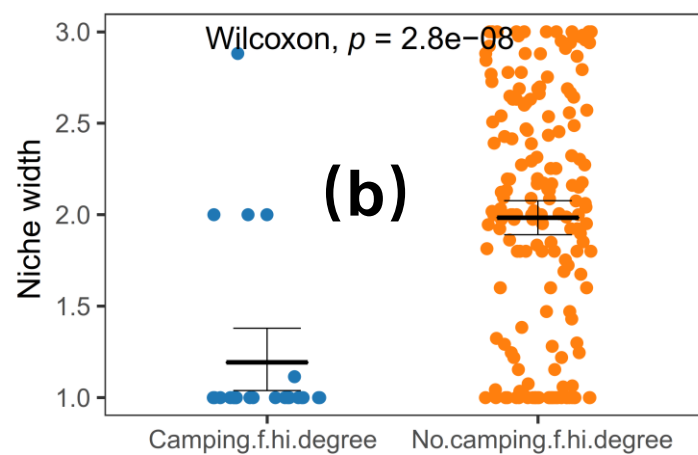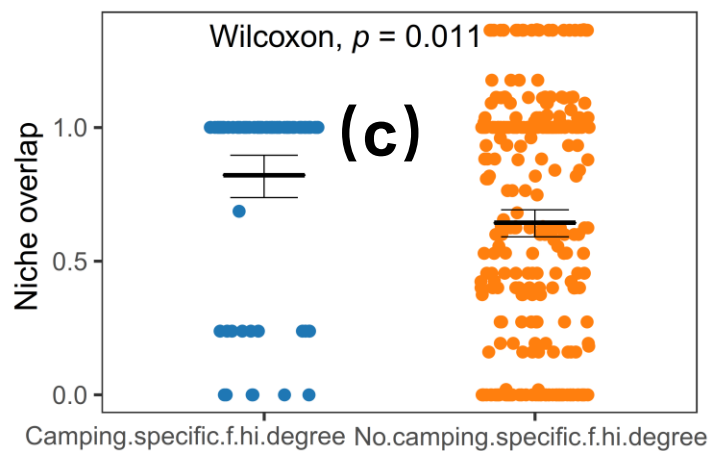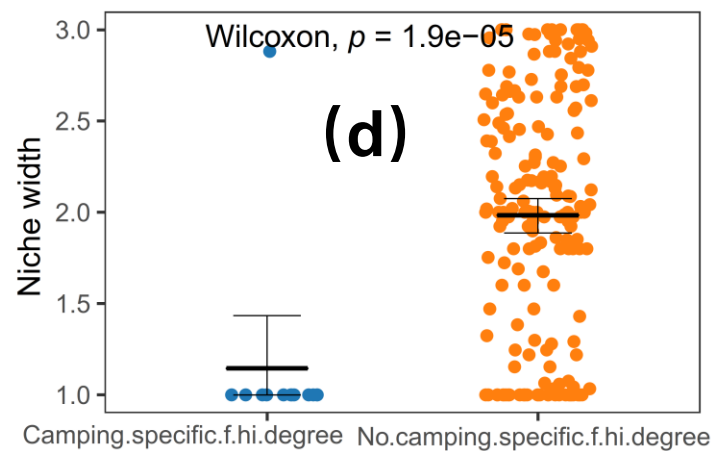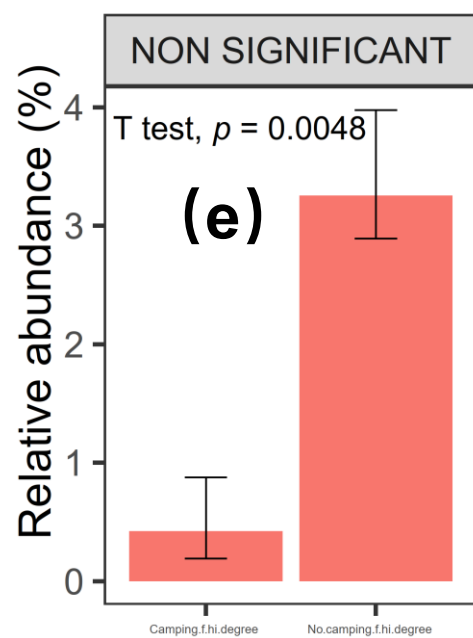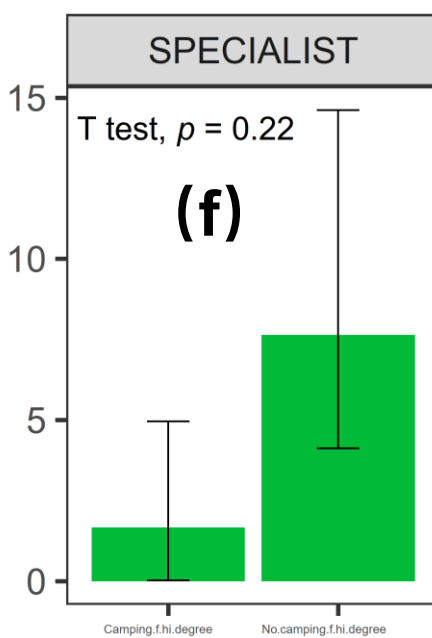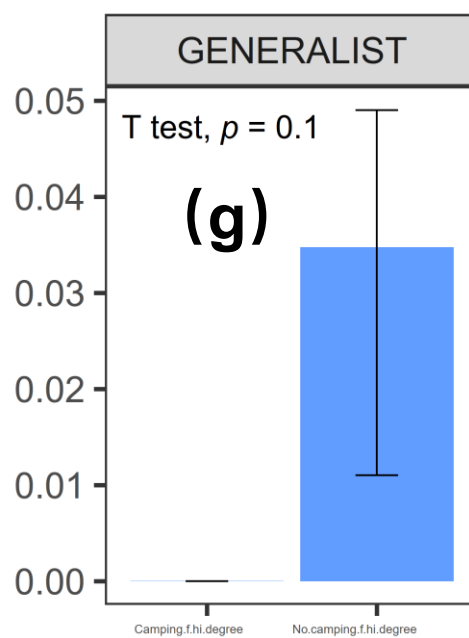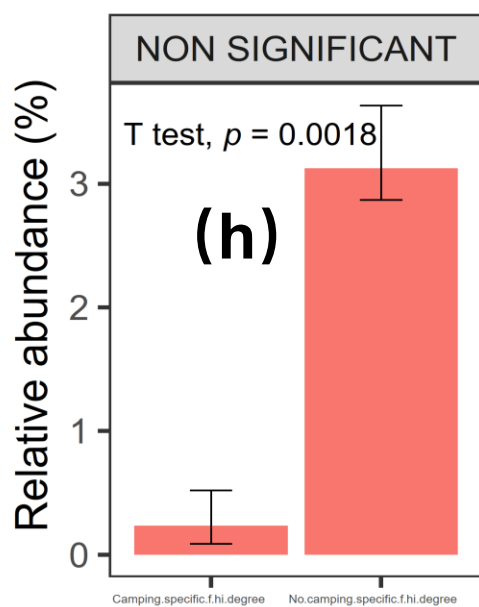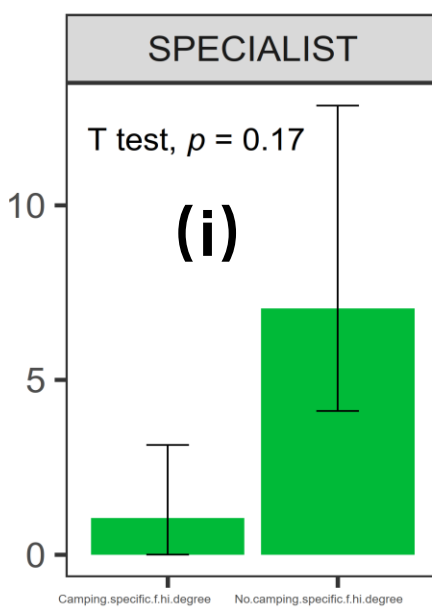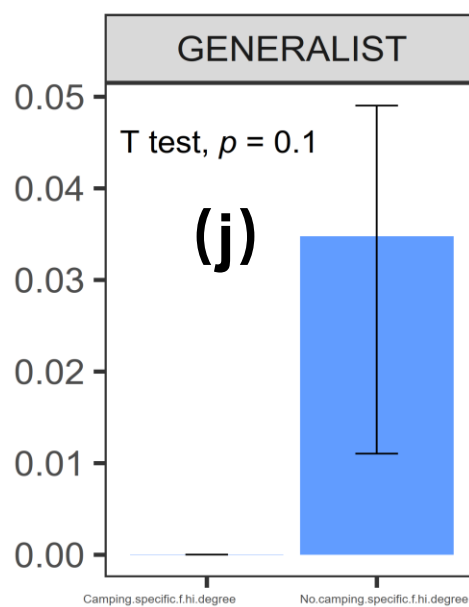

Group

Supplement: Supplementary_Materials_of_Ding_L_et_al_.zip [file Supplementary_Materials_of_Ding_L_et_al_.zip]

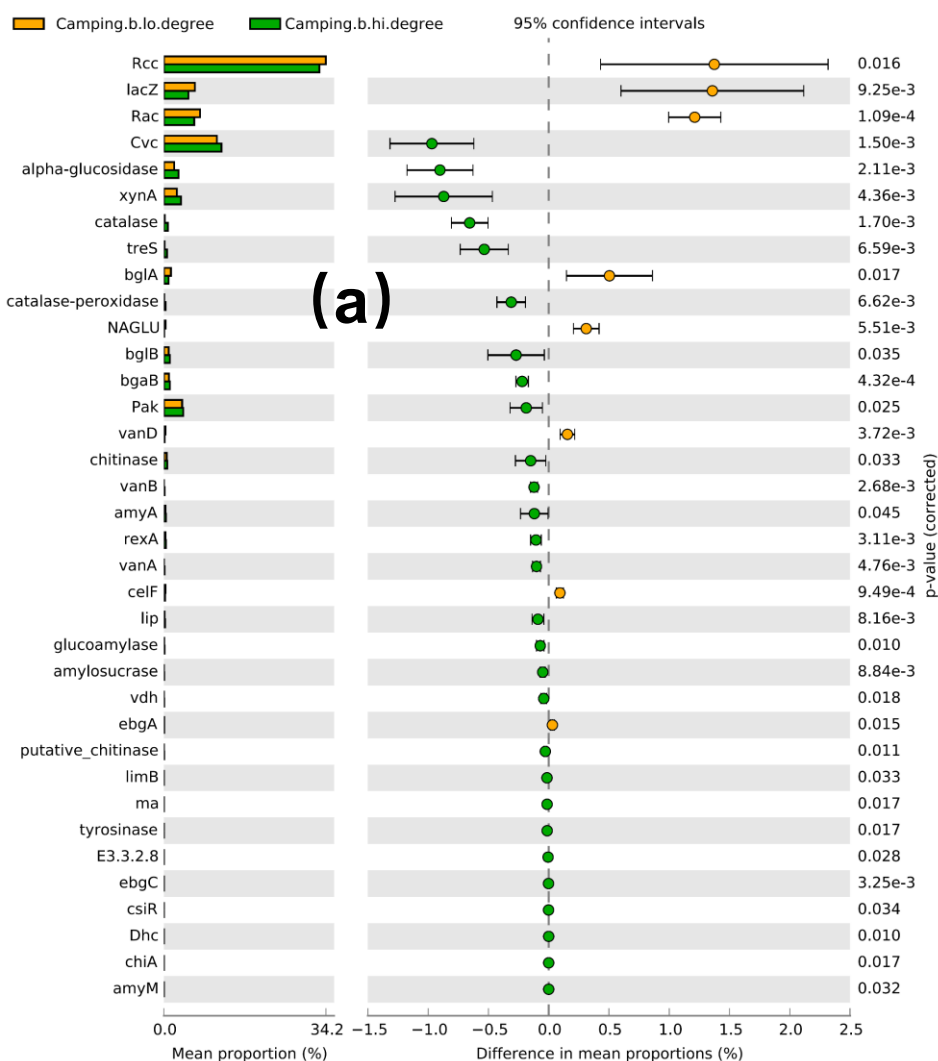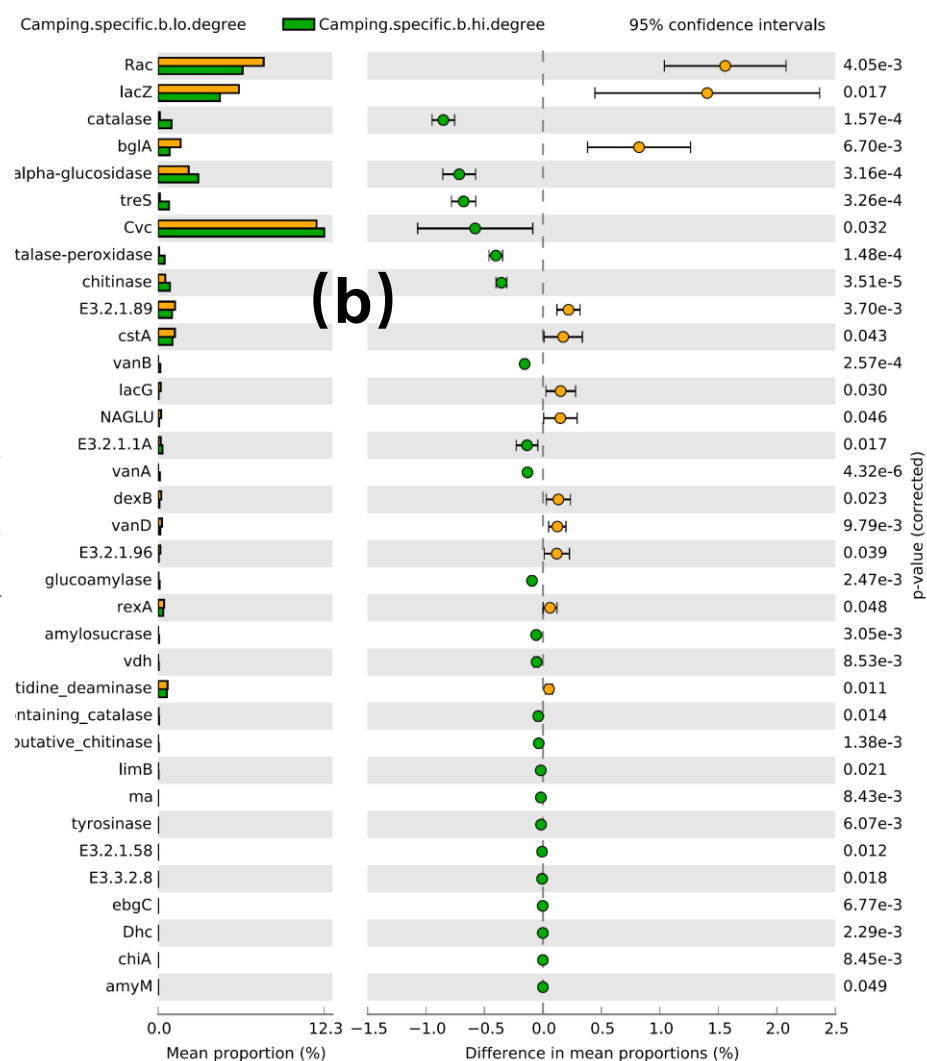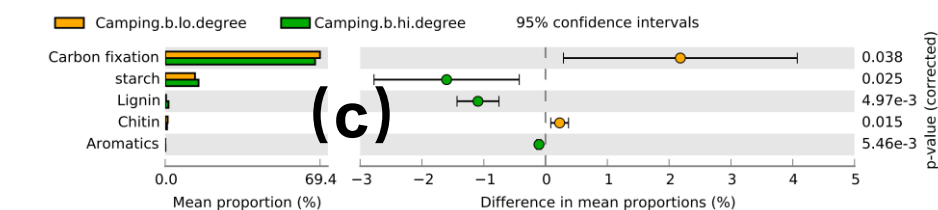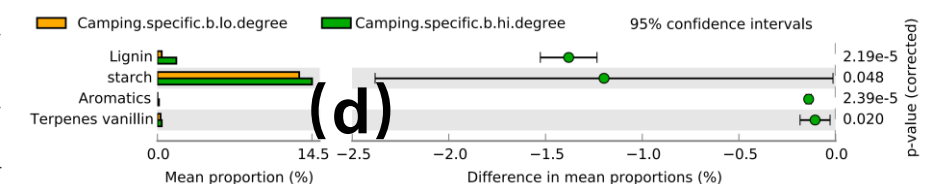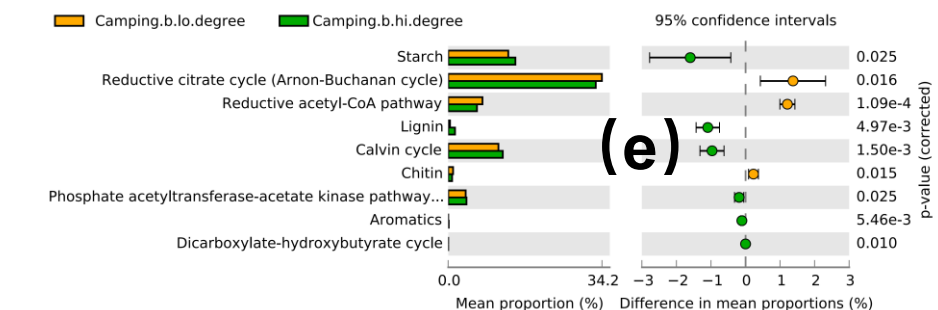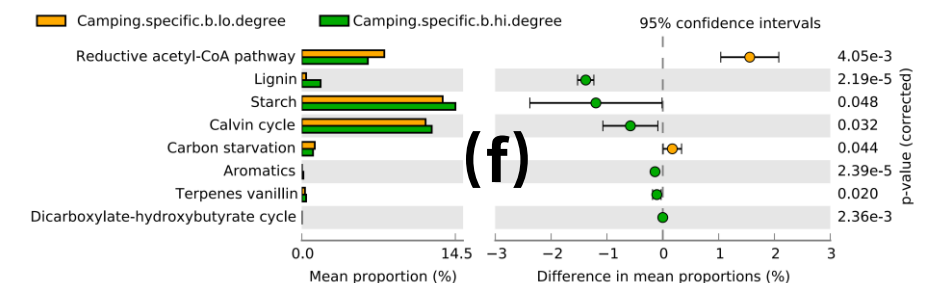

Supplement: Supplementary_Materials_of_Ding_L_et_al_.zip [file Supplementary_Materials_of_Ding_L_et_al_.zip]

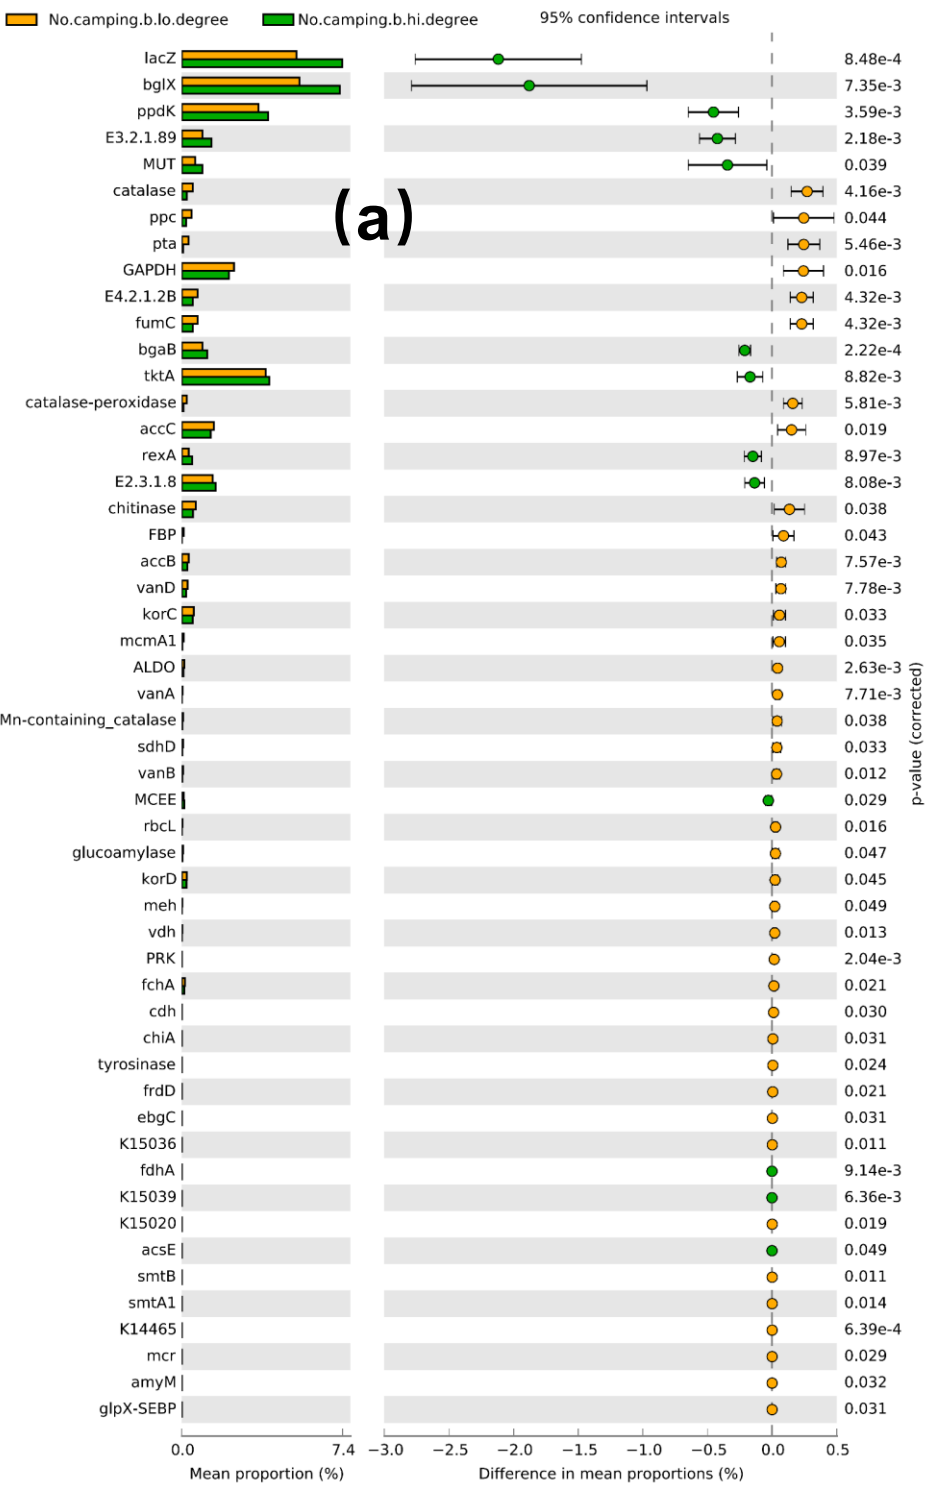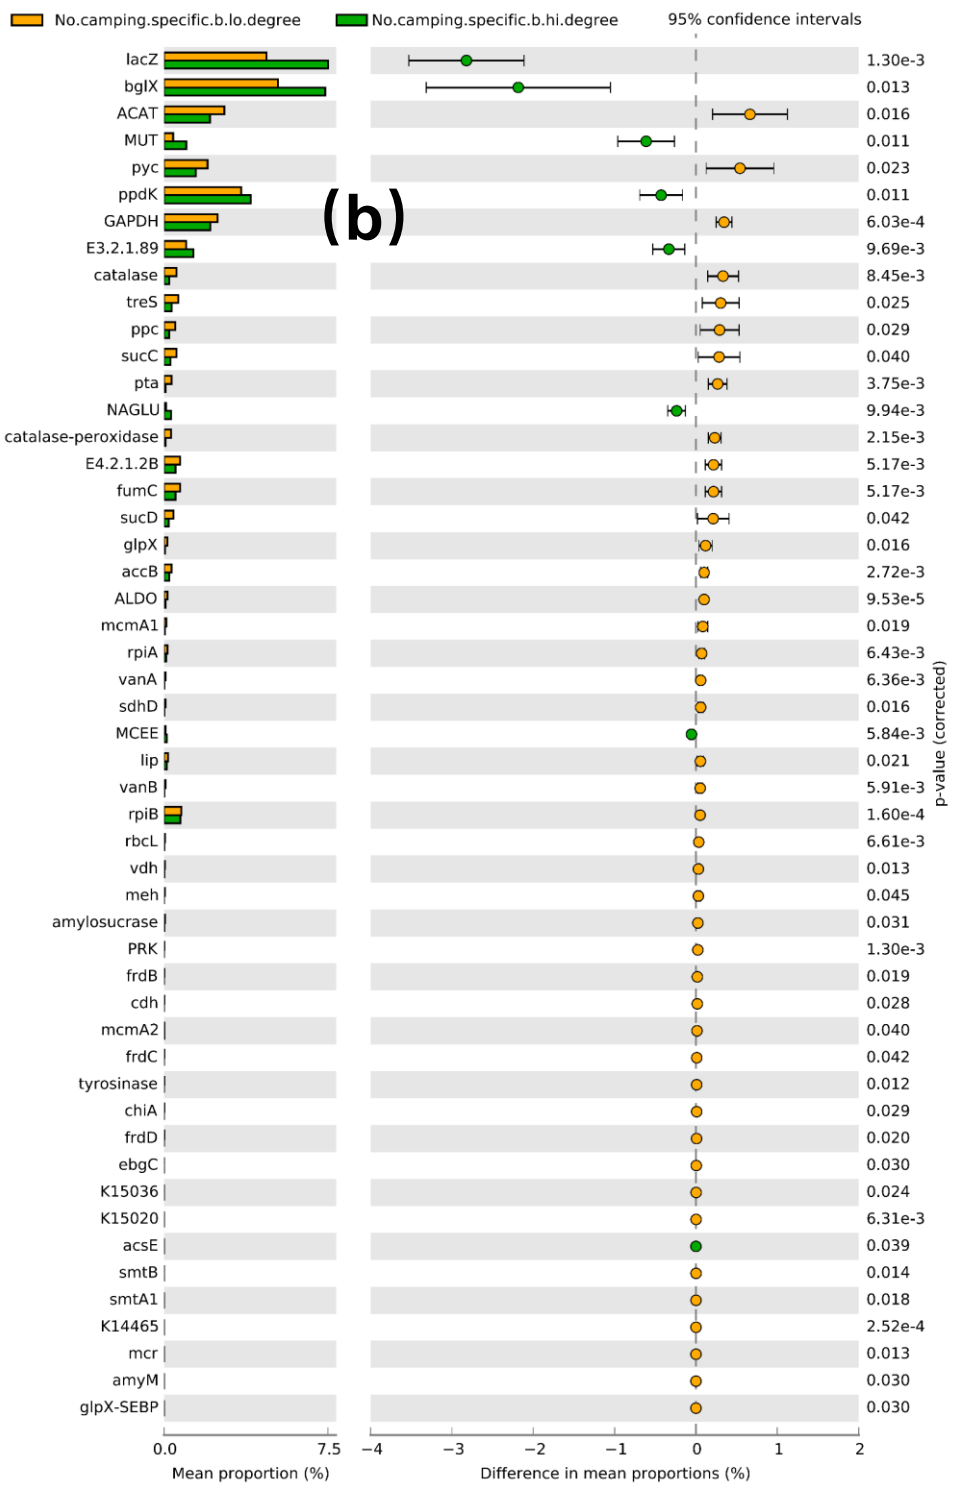

Supplement: Supplementary_Materials_of_Ding_L_et_al_.zip [file Supplementary_Materials_of_Ding_L_et_al_.zip]

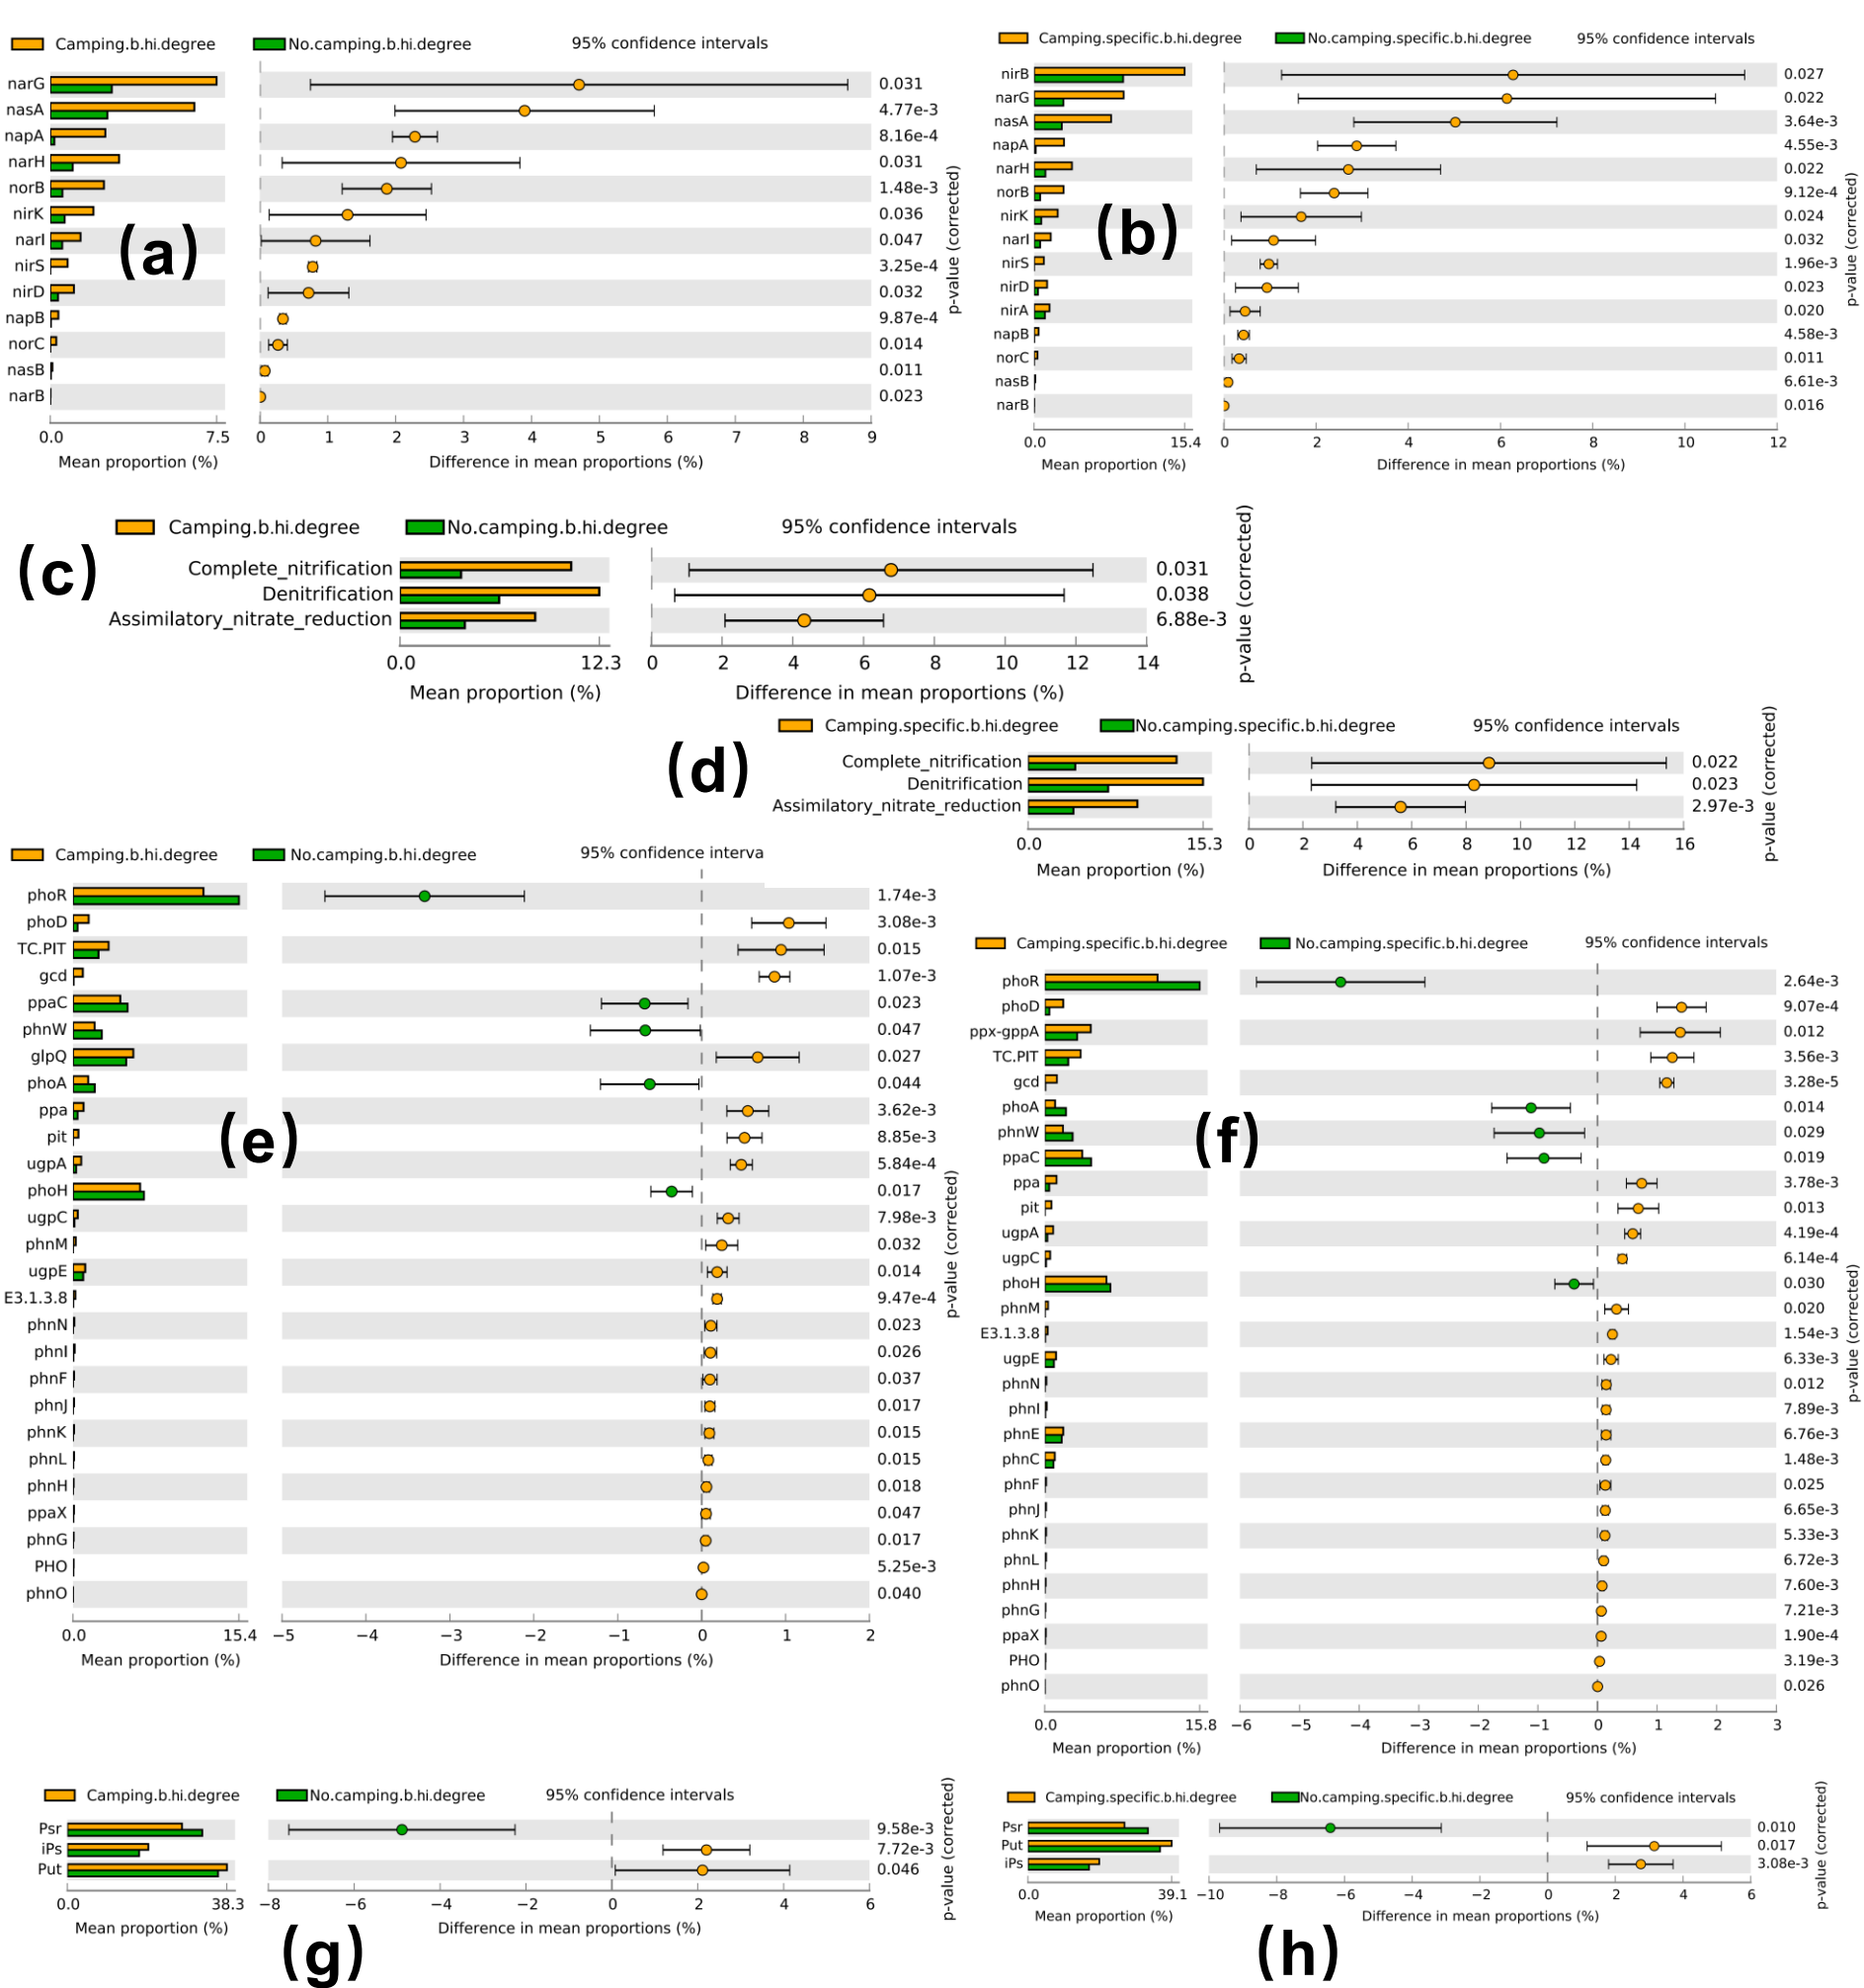

Supplement: Supplementary_Materials_of_Ding_L_et_al_.zip [file Supplementary_Materials_of_Ding_L_et_al_.zip]

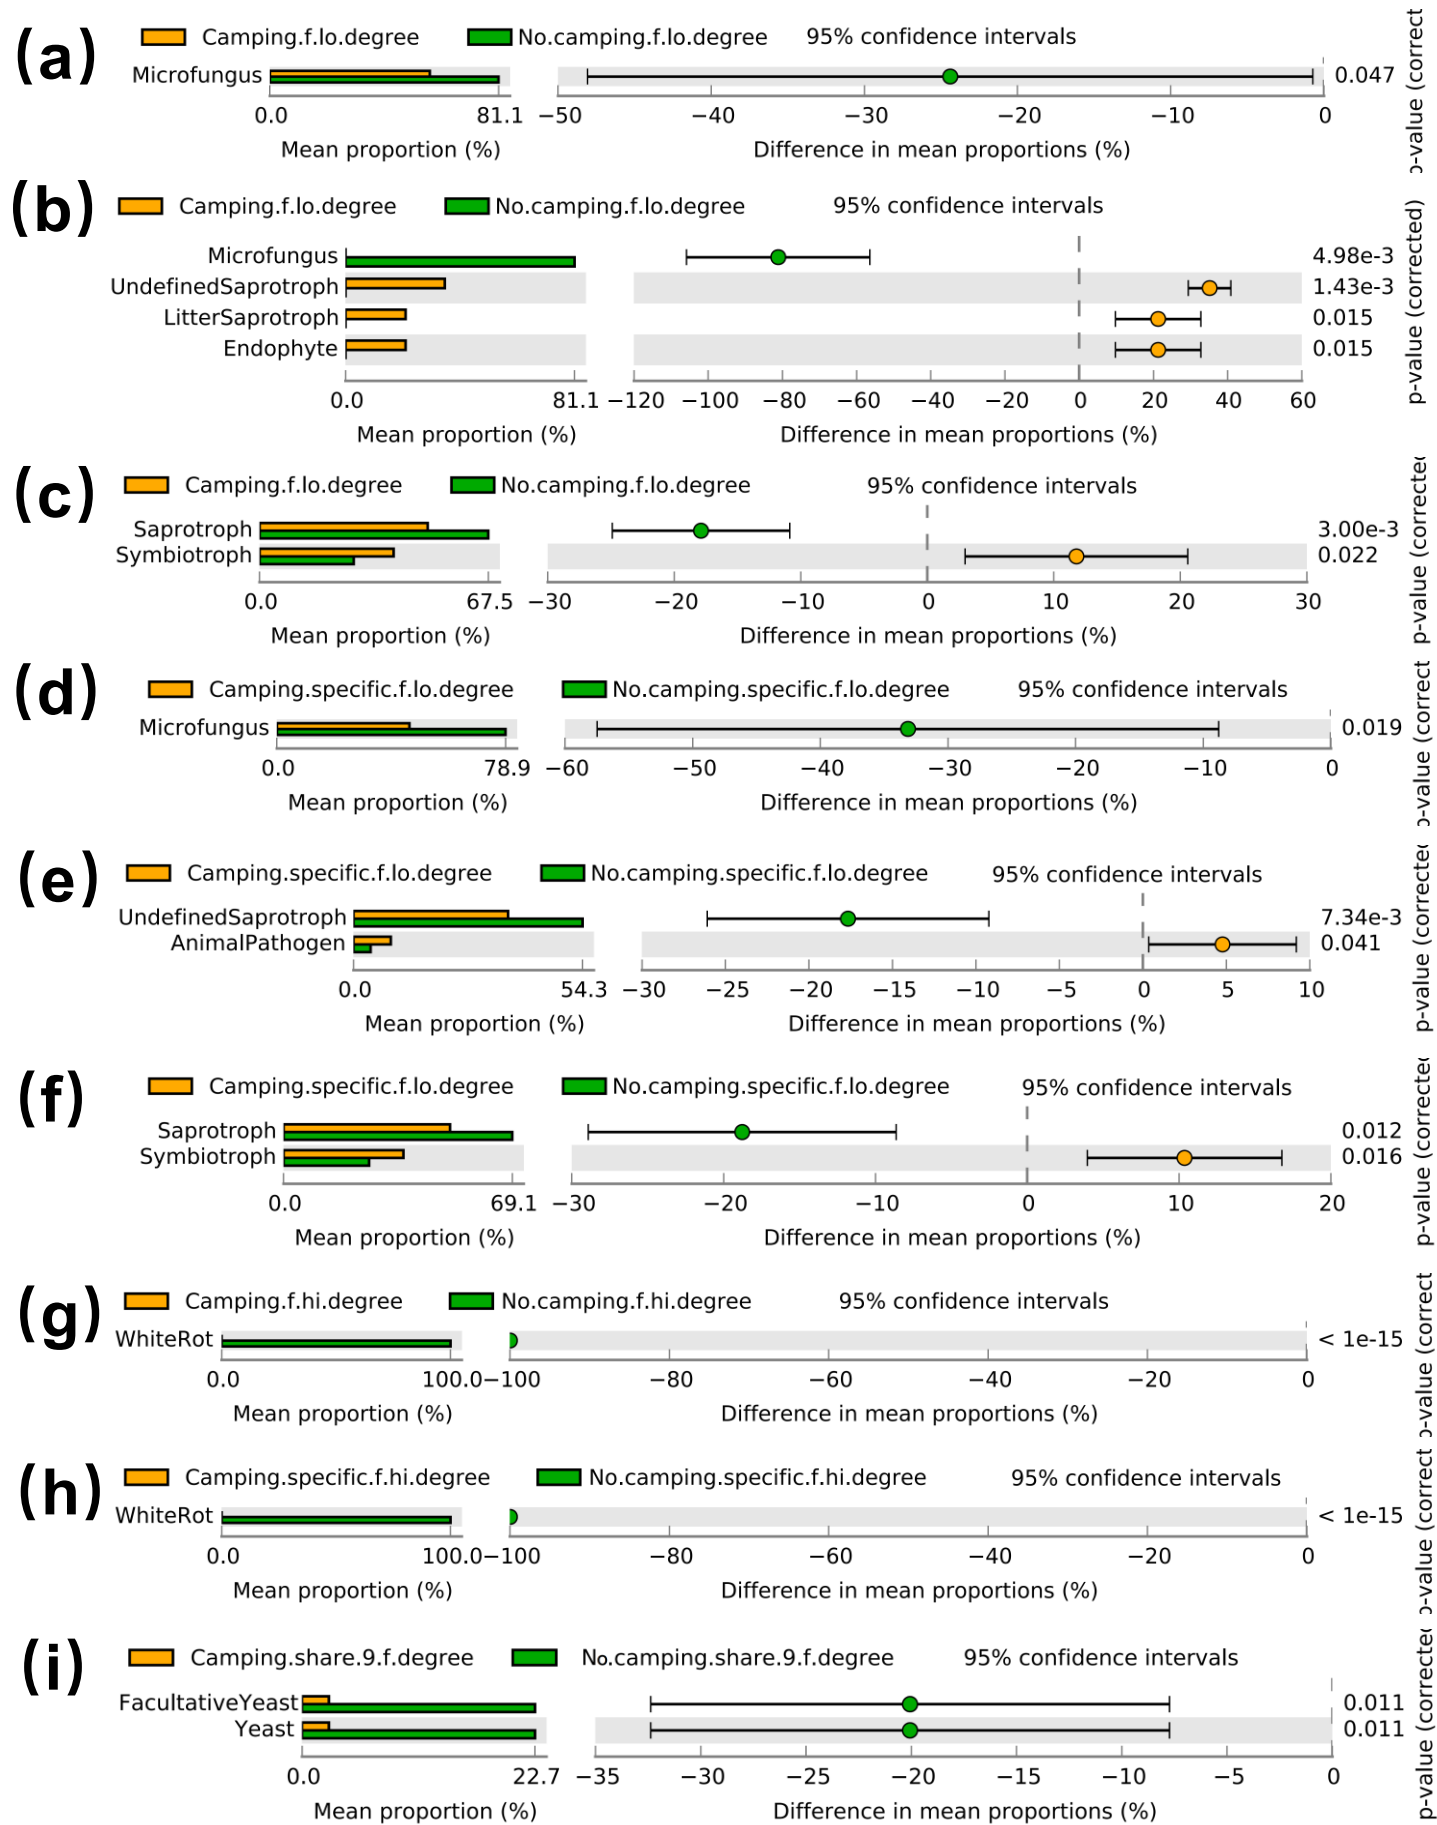

Supplement: Supplementary_Materials_of_Ding_L_et_al_.zip [file Supplementary_Materials_of_Ding_L_et_al_.zip]

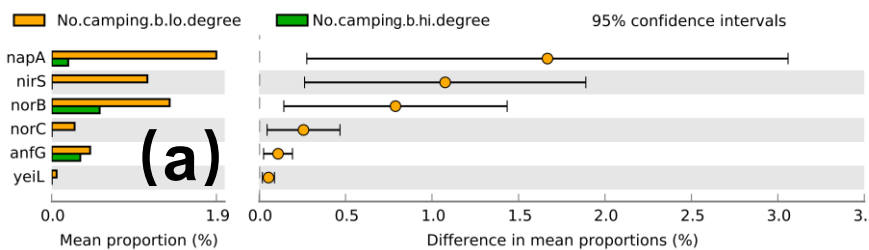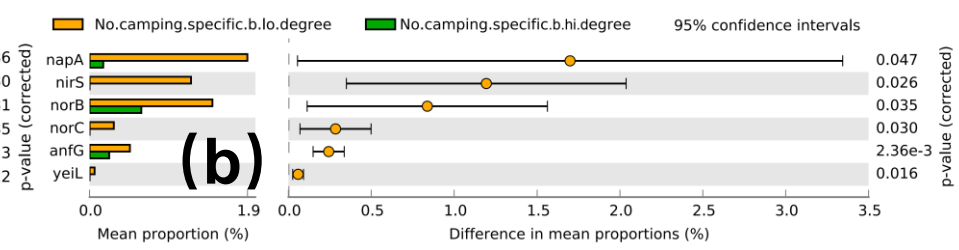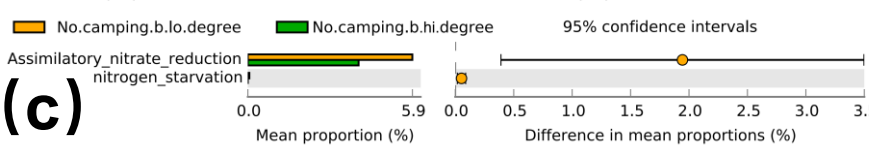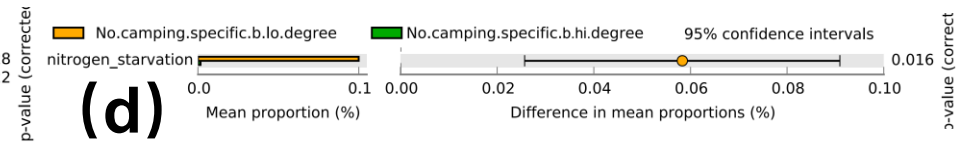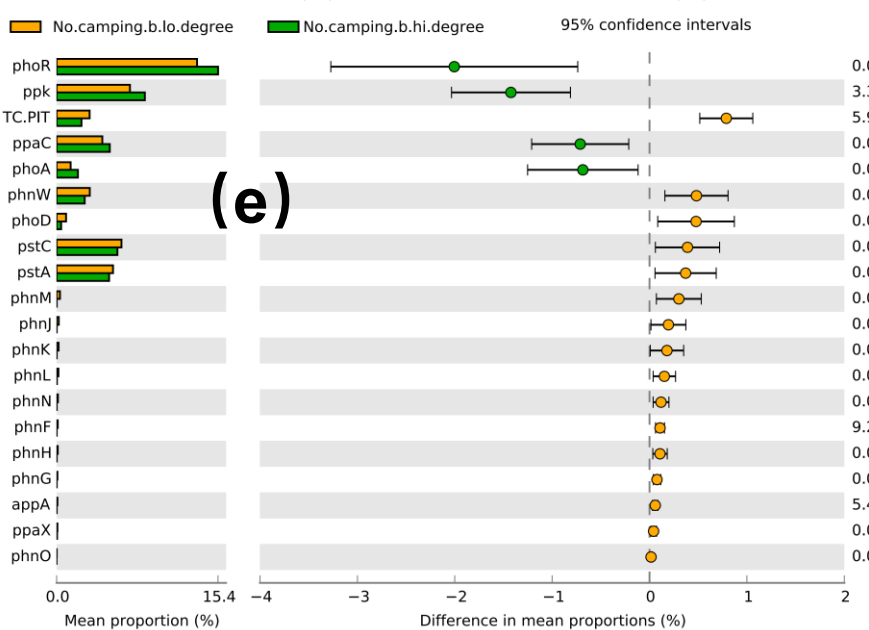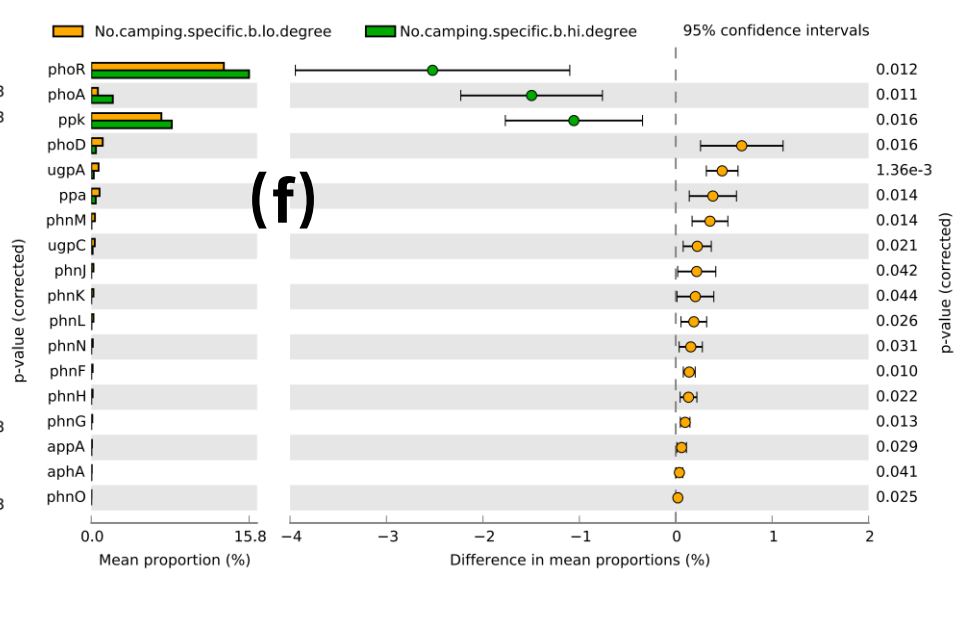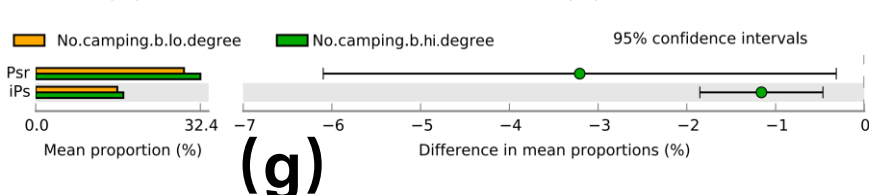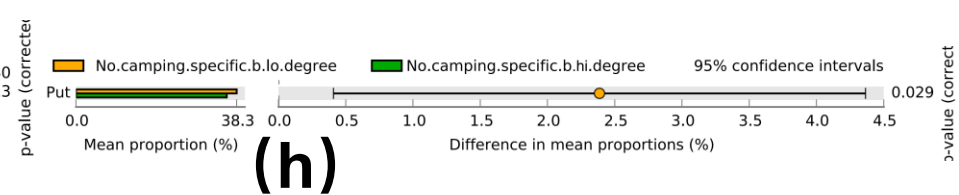

Supplement: Supplementary_Materials_of_Ding_L_et_al_.zip [file Supplementary_Materials_of_Ding_L_et_al_.zip]

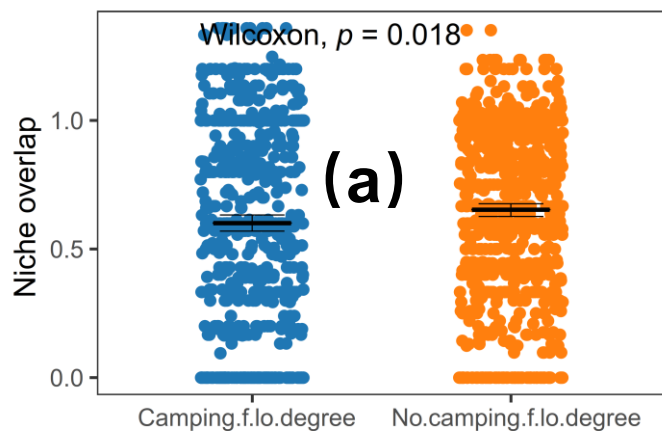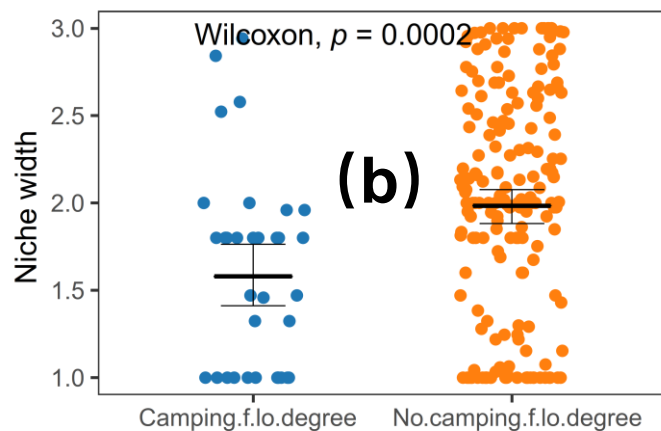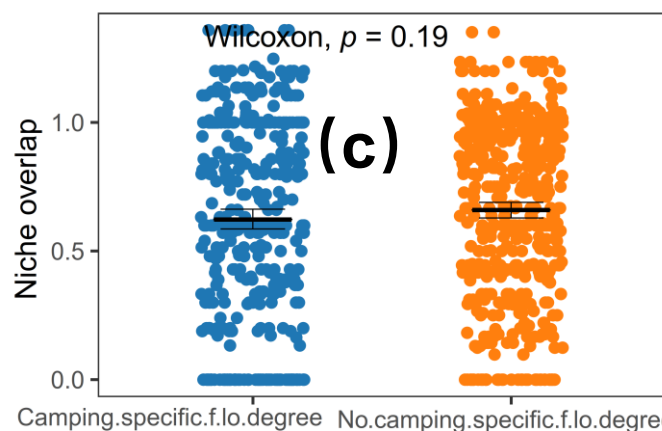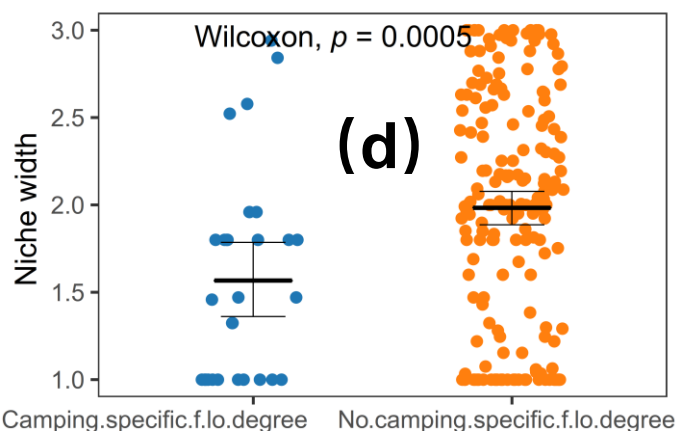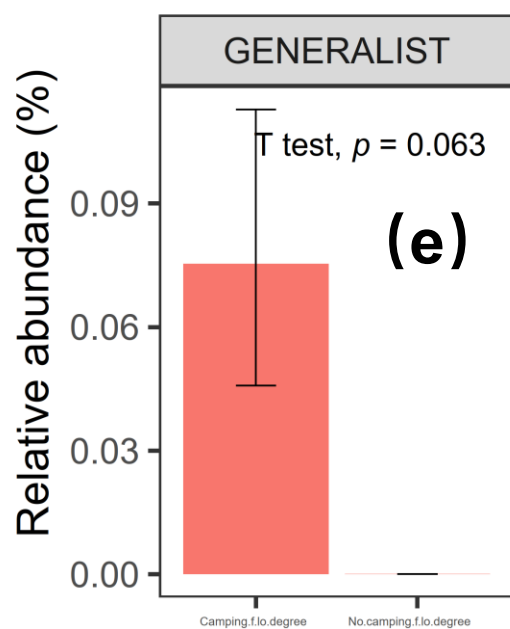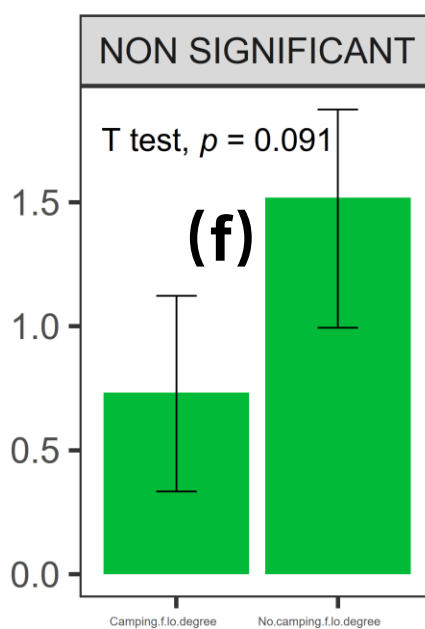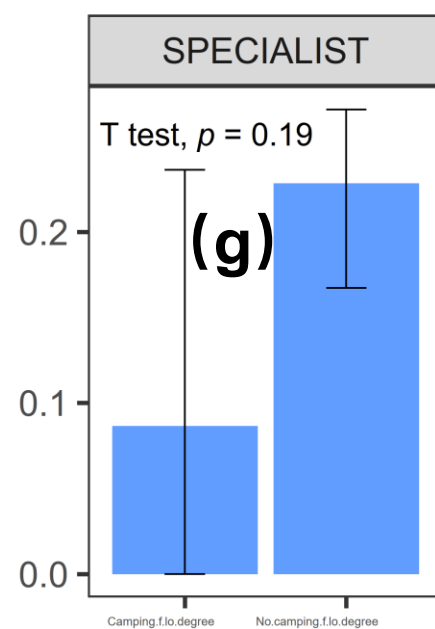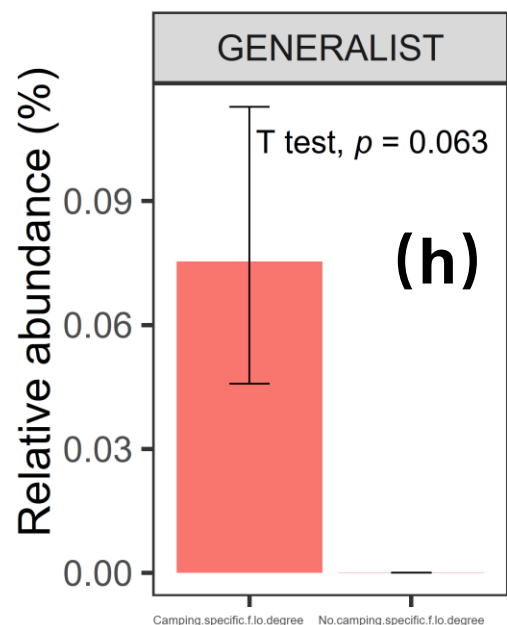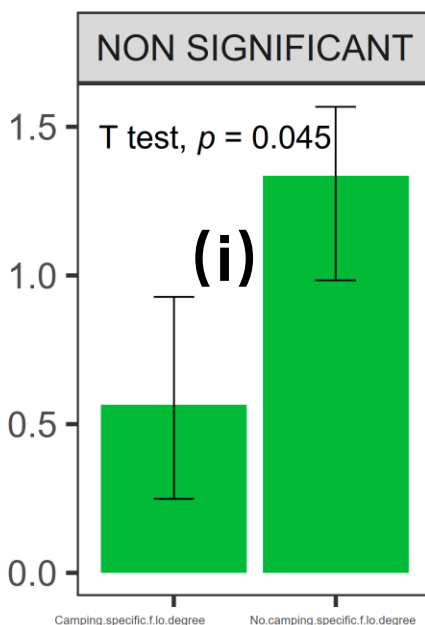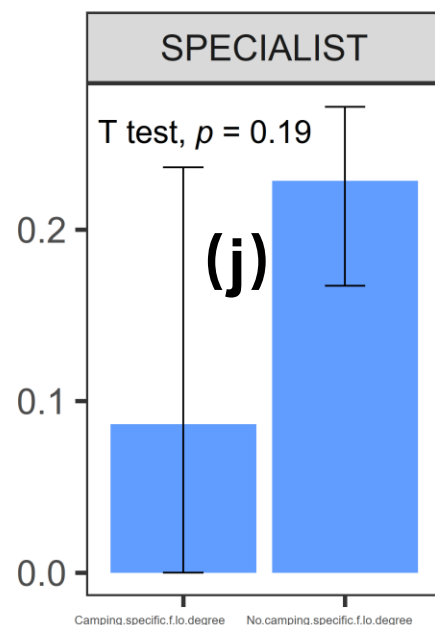

Group

Supplement: Supplementary_Materials_of_Ding_L_et_al_.zip [file Supplementary_Materials_of_Ding_L_et_al_.zip]

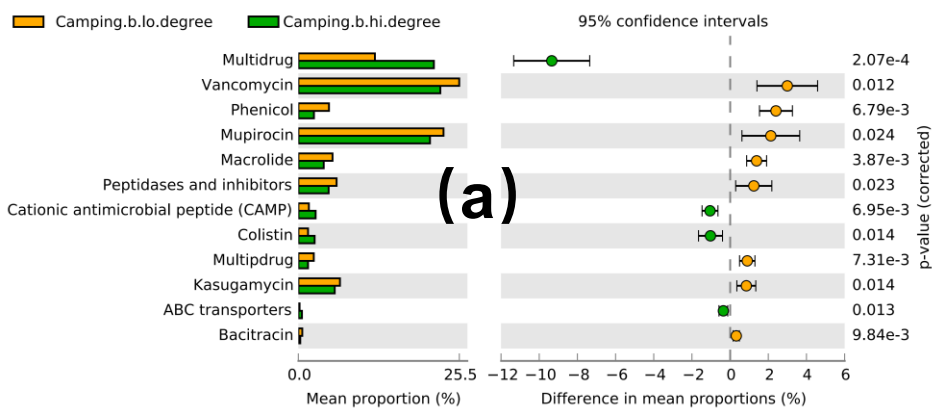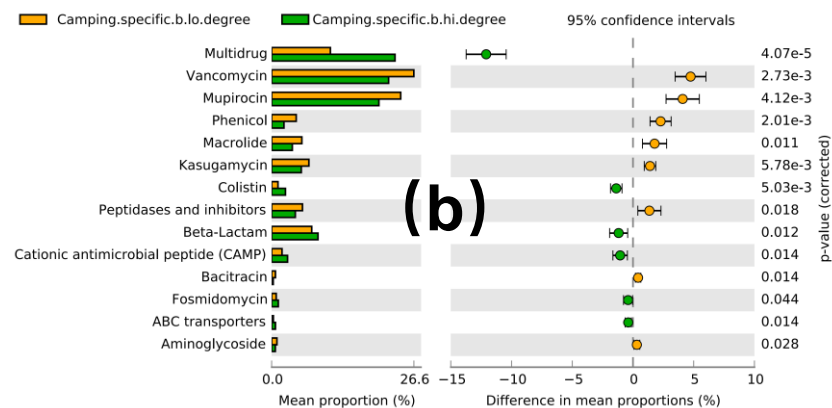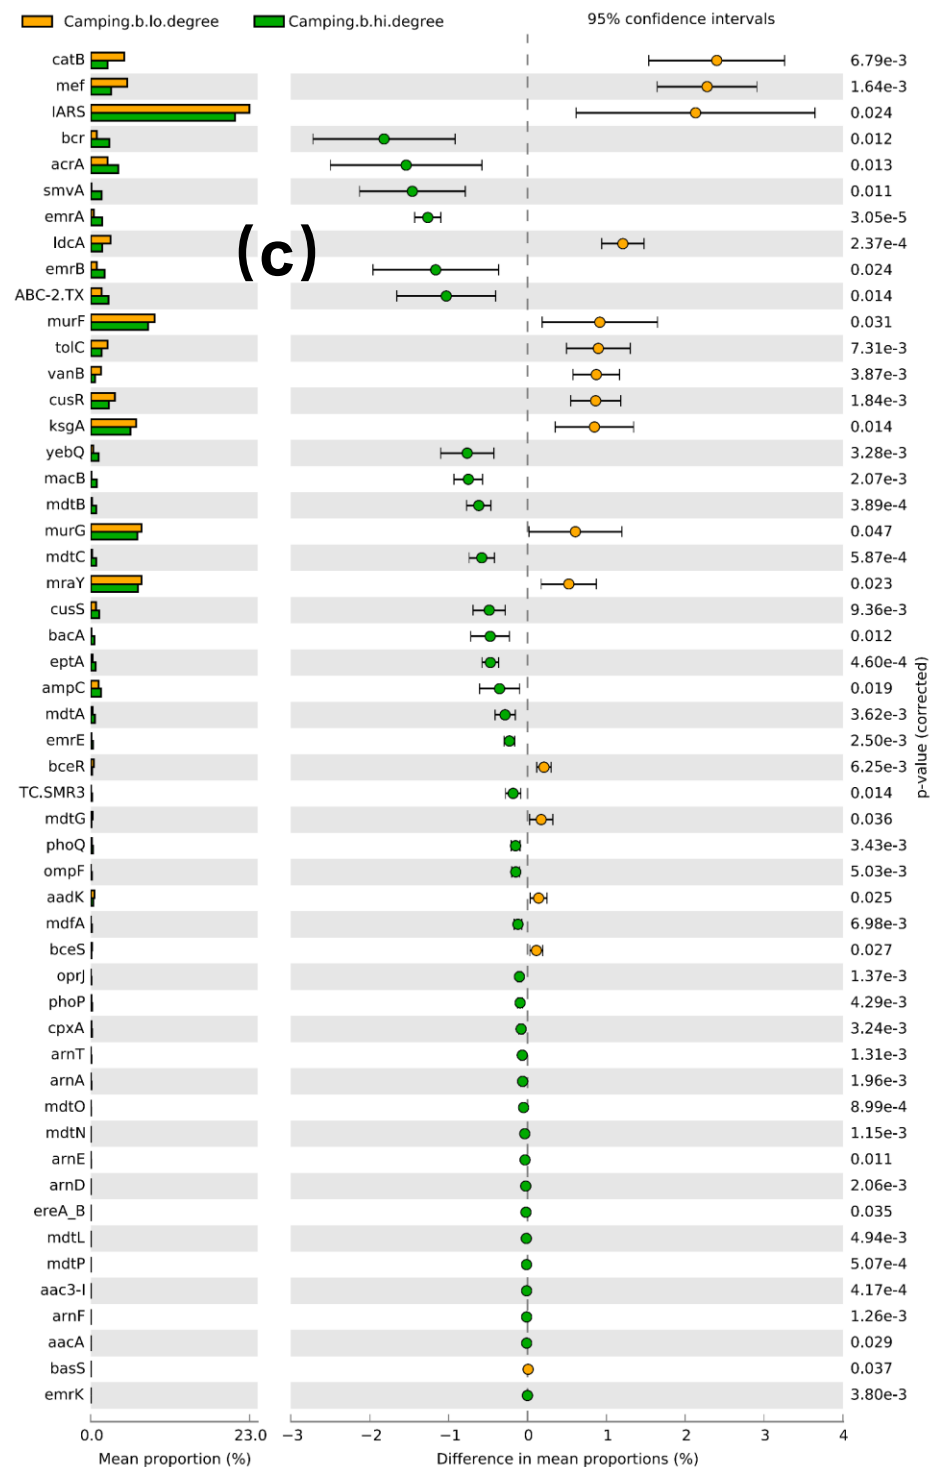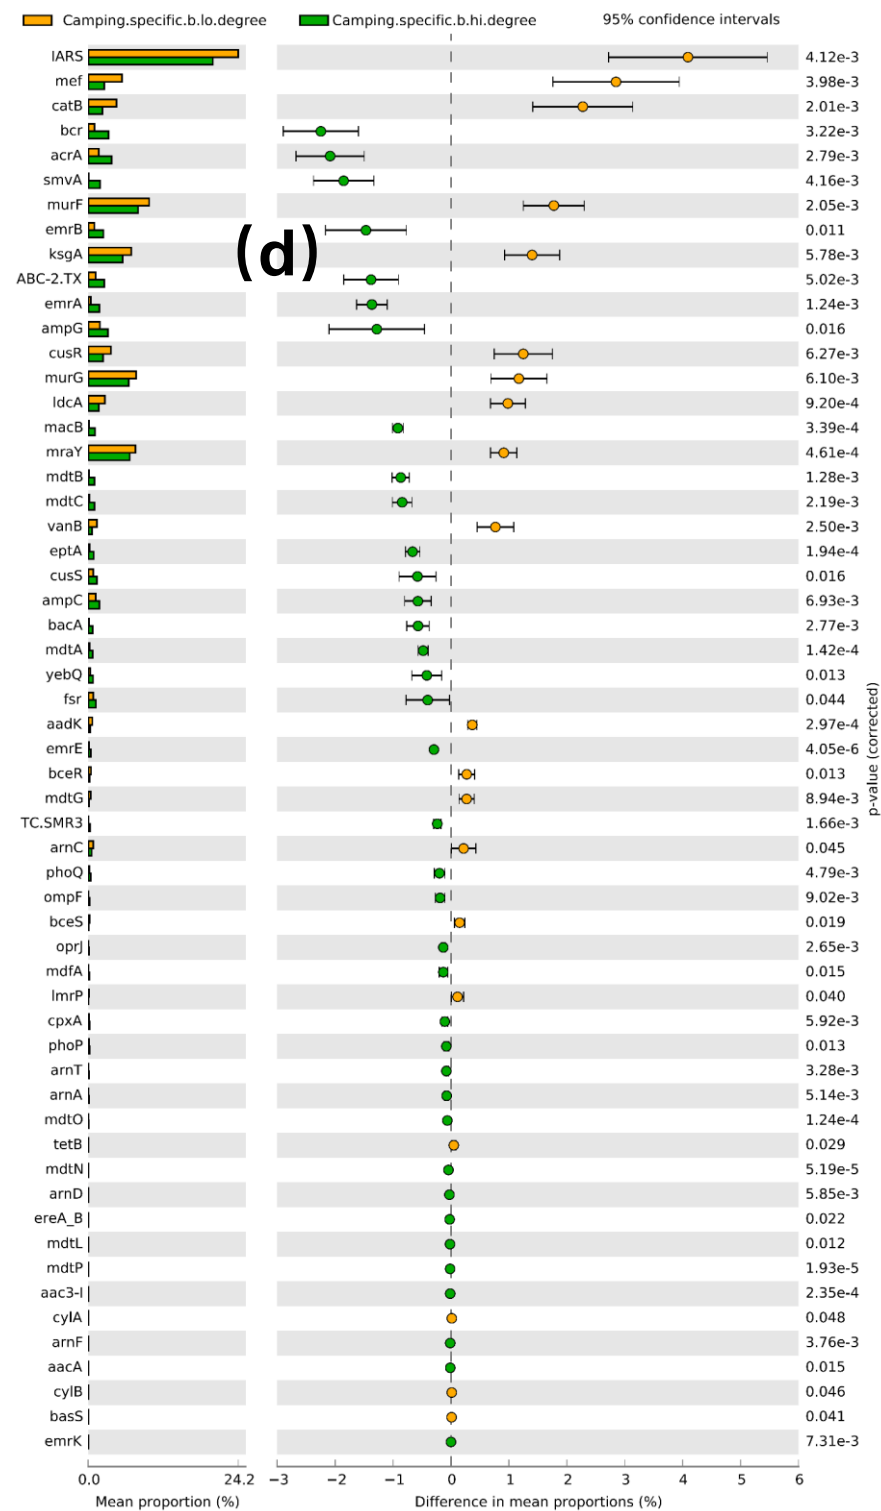

Supplement: Supplementary_Materials_of_Ding_L_et_al_.zip [file Supplementary_Materials_of_Ding_L_et_al_.zip]

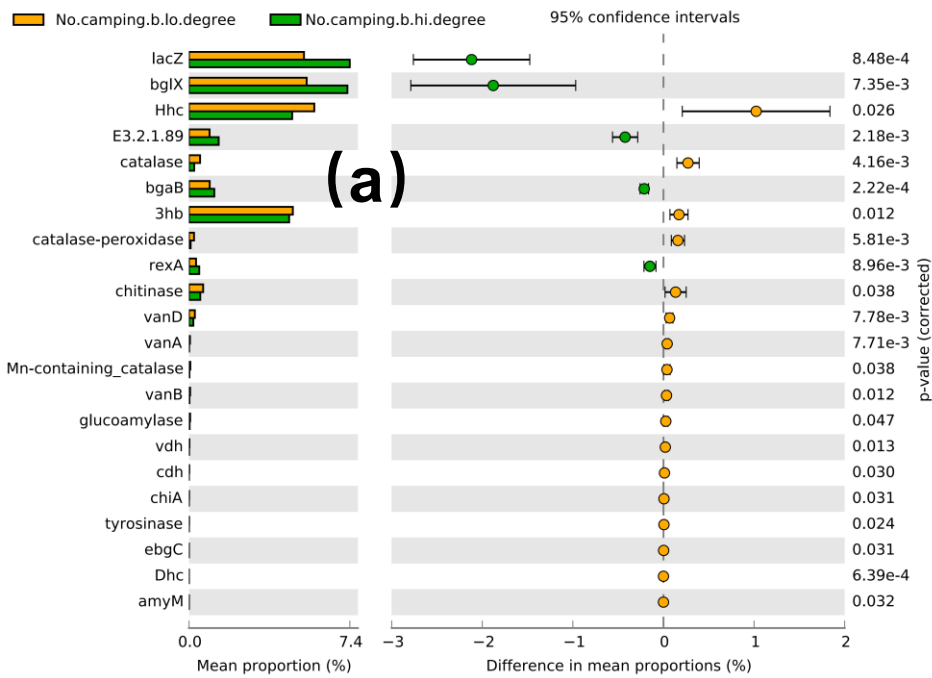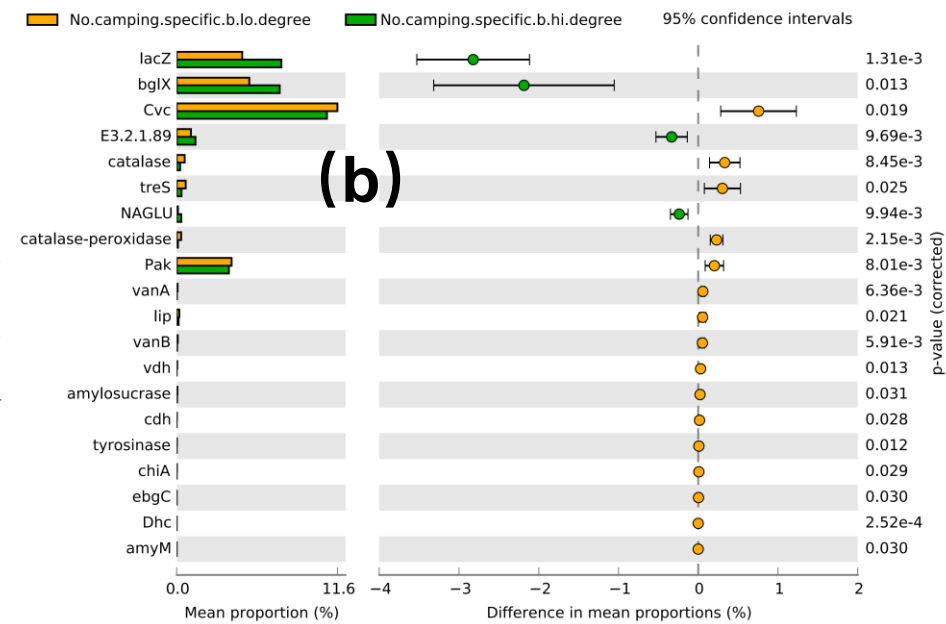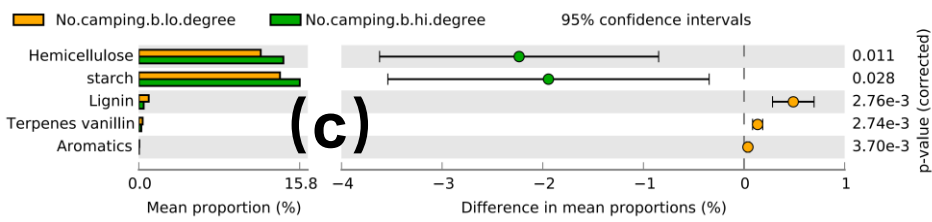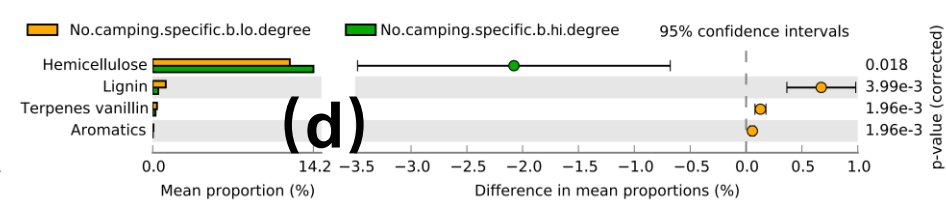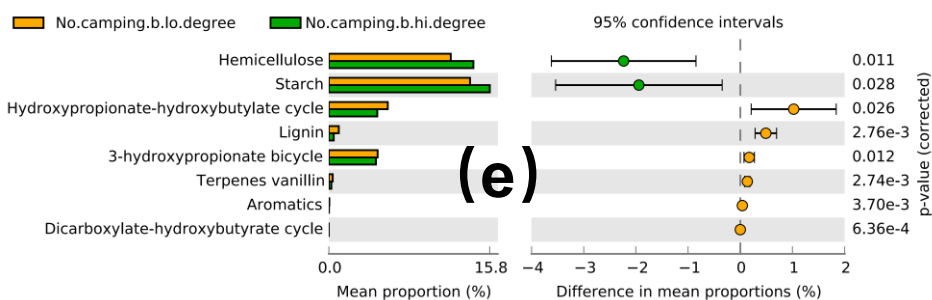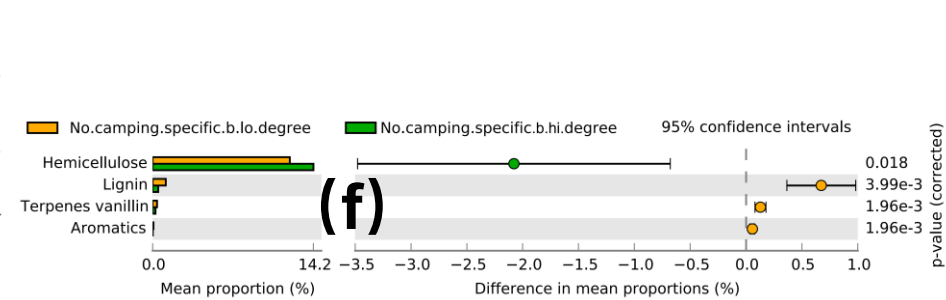

Supplement: Supplementary_Materials_of_Ding_L_et_al_.zip [file Supplementary_Materials_of_Ding_L_et_al_.zip]
